# Supplementary material
Source: publisher figshare collection journal article supplement (https://gsapubs.figshare.com/articles/dataset/_/20482131)
Supplement: Supplementary file 1 [file 1]

## Sheet: S1. Bulk Rock
XRF				Lewis, C.T., de Silva, S.L., and Burns, D.H., 2022, Rhyolitic melt production in the midst of a continental arc flare-up—The heterogeneous Caspana ignimbrite of the Altiplano-Puna volcanic complex of the Central Andes: Geosphere, v. 18, https://doi.org/10.1130/GES02462.1.													XRF - Acid Washed 10% HCl										TIMS - Isotopic Analyses
Unnormalized																	*Some samples were new and some were re-runs to check for pervasive contamination										Analyses
Sample	CH19C006-CL	CH19C002-CL	CH19C003-CL	CH19C007-CL	CH19C009-CL	84014-Caspana	84015-Dark	84015-Light	83070	84015-Dark®	CH12020 (2)	CH12021	CH12022-light	CH12022-dark			84014	CH19C006	84015	83070	CH19C005	CH12022	CH12020(1)	CH19C009				CH19C005	CH19C006	CH19C009	CH12022	CH12021	84015	84015*	84014*
SiO2	57.6589	69.926	70.6266	58.5442	68.7942	72.2563	58.2759	57.6027	70.7326	58.2627	53.6533	71.7556	69.3051	69.4447			72.3807	58.2054	57.7256	72.4797	69.9353	69.5345	58.2525	68.9423			87Sr/86Sr	0.711258	0.711168	0.708247	0.708122	0.711289	0.711231	0.71114	0.71079
TiO2	0.661748	0.173166	0.170305	0.610114	0.18611	0.0990011	0.631064	0.757867	0.0824571	0.632306	0.539181	0.08259	0.183152	0.187229			0.10478	0.656804	0.737278	0.0852271	0.08927	0.185382	0.702769	0.206058			143Nd/144Nd	0.512154	0.51214	0.512317	0.512136	0.512096	0.512134	0.512127	0.512148
Al2O3	20.0301	14.1665	13.8675	19.6345	14.7536	12.7914	20.6377	20.114	12.4394	20.6423	17.862	12.273	14.7399	14.5456			12.8992	19.4239	21.2585	12.6954	11.9495	14.669	20.3235	14.9589			206Pb/204Pb	18.773	18.745	18.814	18.812	18.763	18.745
FeO*	3.65655	1.15246	1.12318	3.58525	1.24046	1.55862	3.51918	4.33261	1.48018	3.56263	3.19514	1.41003	1.1676	1.21398			1.61812	3.60595	3.80842	1.4968	1.42635	1.16597	3.65801	1.28663			207Pb/204Pb	15.662	15.657	15.649	15.649	15.665	15.66
MnO	0.0595728	0.0802098	0.0820463	0.0588095	0.0798089	0.0338299	0.0580184	0.0704311	0.033957	0.0582307	0.0618641	0.0315415	0.0796854	0.0842885			0.0342072	0.0586468	0.0632323	0.032525	0.0302733	0.0811406	0.0608241	0.0792736			208Pb/204Pb	38.843	38.85	38.796	38.791	38.871	38.854
MgO	2.14271	0.265617	0.266864	1.76716	0.281343	0.317435	1.5257	2.16057	0.335437	1.52584	1.88635	0.970284	0.269054	0.284039			0.283257	2.67671	1.51727	0.176993	2.36509	0.24509	1.85666	0.280273
CaO	7.81596	1.30109	1.31262	7.60035	1.32411	1.06378	7.78304	7.76715	1.19421	7.77789	11.4942	1.01859	1.32629	1.33458			1.08754	7.26627	8.19795	1.03189	1.03602	1.28866	7.58879	1.31915			Error
Na2O	2.64764	3.06526	3.57433	2.70363	2.9705	2.66988	2.71306	2.51104	3.00661	2.71683	2.34528	2.37462	2.92084	3.10802			2.68629	2.45159	2.73139	2.65663	2.01072	3.07437	2.6589	3.01543				CH19C005	CH19C006	CH19C009	CH12022	CH12021	84015
K2O	1.87321	3.92092	3.94739	2.12501	3.78953	5.34792	2.0583	1.96745	5.39854	2.06285	1.89462	5.47562	3.86477	3.85426			5.29188	1.88209	1.86688	5.51322	4.82617	3.82353	1.94436	3.8143			87Sr/86Sr	1.6e-05	8e-06	1.3e-05	9e-06	1e-05	8e-06
P2O5	0.192375	0.0490446	0.049703	0.184294	0.0491683	0.0239306	0.196274	0.233397	0.0212256	0.197188	0.179682	0.0183826	0.050653	0.053318			0.0159458	0.130263	0.125214	0.0155936	0.01476	0.0474876	0.130106	0.0500068			143Nd/144Nd	5e-06	5e-06	7e-06	6e-06	1.2e-05	6e-06
Total	96.7388	94.1003	95.0206	96.8134	93.4688	96.1621	97.3983	97.5171	94.7247	97.4387	93.1116	95.4102	93.9071	94.11			96.4019	96.3576	98.0317	96.184	93.6834	94.1151	97.1763	93.9523			206Pb/204Pb	0.001	0.002	0.001	0.001	0.002	0.001
LOI %	2.6618	5.50847	4.40801	2.53277	5.93623	3.36746	2.19544	2.13248	4.3797	2.19544	6.44502	4.05751	5.80804	5.45487			3.4258	3.4964	1.76257	3.52019	6.01571	5.68624	2.65423	5.68546			207Pb/204Pb	0.001	0.001	0.001	0.001	0.002	0.001
																											208Pb/204Pb	0.002	0.003	0.002	0.002	0.003	0.003
Normalized																	Normalized
SiO2	59.6027	74.3101	74.3277	60.4712	73.6012	75.1401	59.8326	59.0693	74.6718	59.7942	57.6225	75.2074	73.8018	73.791			75.0822	60.4056	58.8846	75.3553	74.6506	73.8824	59.9451	73.3801			Standards
TiO2	0.684056	0.184023	0.179229	0.630196	0.199115	0.102952	0.647921	0.777162	0.0870492	0.648927	0.579069	0.086563	0.195036	0.198947			0.108691	0.681632	0.752082	0.0886084	0.095289	0.196973	0.723189	0.219322				87Sr/86Sr	Error	206Pb/204Pb	Error	207Pb/204Pb	Error	208Pb/204Pb
Al2O3	20.7053	15.0547	14.5942	20.2808	15.7845	13.3019	21.189	20.6261	13.1322	21.1849	19.1835	12.8634	15.6963	15.4559			13.3807	20.1581	21.6853	13.1991	12.7552	15.5862	20.914	15.9218			NBS987	0.710291	1.2e-05	16.93	0.001	15.482	0.001	36.667	0.002
FeO*	3.77982	1.22472	1.18204	3.70326	1.32714	1.62083	3.61318	4.44292	1.56261	3.65627	3.43151	1.47786	1.24335	1.28996			1.67852	3.74225	3.88489	1.55618	1.52252	1.23887	3.7643	1.36945				0.710293	1.2e-05	16.929	0.001	15.482	0.001	36.667	0.002
MnO	0.0615811	0.0852386	0.0863458	0.0607452	0.0853855	0.0351801	0.0595682	0.0722243	0.0358481	0.0597614	0.0664408	0.0330588	0.0848556	0.0895638			0.035484	0.0608637	0.0645018	0.0338154	0.0323145	0.0862142	0.0625915	0.0843764						16.93	0.001	15.483	0.001	36.672	0.002
MgO	2.21495	0.28227	0.280849	1.82533	0.301002	0.330104	1.56646	2.21558	0.354118	1.56595	2.0259	1.01696	0.286511	0.301816			0.29383	2.77789	1.54773	0.184015	2.52455	0.260415	1.91061	0.298314			La Jolla	143Nd/144Nd	Error
CaO	8.07945	1.38266	1.38141	7.85052	1.41663	1.10624	7.99094	7.96491	1.26071	7.98234	12.3445	1.06759	1.41234	1.41811			1.12813	7.54094	8.36255	1.07282	1.10588	1.36924	7.8093	1.40407				0.512111	1e-05
Na2O	2.73689	3.25744	3.76164	2.79262	3.17806	2.77644	2.78553	2.57497	3.17405	2.78825	2.51879	2.48885	3.11035	3.30254			2.78655	2.54426	2.78623	2.76203	2.14629	3.26661	2.73616	3.20954				0.512116	9e-06
K2O	1.93636	4.16675	4.15425	2.19495	4.05432	5.56136	2.11328	2.01754	5.6992	2.11707	2.03479	5.73903	4.11553	4.09549			5.4894	1.95323	1.90436	5.73195	5.15157	4.06261	2.00085	4.05982				0.512103	1e-05
P2O5	0.198861	0.0521195	0.0523076	0.19036	0.052604	0.0248857	0.201517	0.23934	0.0224077	0.202371	0.192975	0.0192669	0.0539395	0.056655			0.016541	0.135187	0.127728	0.0162123	0.0157552	0.0504569	0.133887	0.0532258				0.512115	8e-06
Total	100	100	100	100	100	100	100	100	100	100	100	100	100	100			100	100	100	100	100	100	100	100
																											* from de Silva (1991)
Ni	0	0.594	0.0495	0	0.396	2.39325	2.53725	3.98	1.287	3.407	2.63675	2.4875	1.39525	1.3965			6.58477	2.25137	1.393	0.2	0	3.46113	1.85757	0.8331
Cr	51.8602	62.9145	40.3425	54.526	44.649	61.9945	10.8455	19.1538	4.455	10.6762	12.3877	6.0695	4.18725	4.23875			9.43053	10.5299	12.3048	3.4016	2.66667	3.9601	9.28653	4.83163
Sc	12.608	3.663	3.465	12.6365	3.8115	10.523	12.8355	13.6315	9.405	11.878	11.144	9.751	3.6895	3.59025			10.2573	11.7174	13.5652	10.1731	9.33333	3.3864	12.139	4.4955
V	91.9005	5.049	6.5835	76.9135	6.5835	6.5355	86.764	114.126	6.237	86.1148	76.9632	4.12925	6.68325	8.03225			7.97263	91.321	100.628	3.70347	7	6.92093	94.0596	8.93023
Ba	549.679	940.698	939.312	576.304	930.897	1056.49	565.061	759.533	1050.84	567.372	618.094	1099.97	940.038	954.158			1061.62	522.858	533.851	1068.71	901.4	938.296	562.604	924.457
Rb	69.7695	131.726	135.218	79.56	127.458	182.06	77.61	71.2725	178.722	77.2252	69.1275	171.6	129.469	130.251			179.003	70.3067	69.5175	182.143	165.718	129.433	72.7674	128.957
Sr	526.679	215.325	216.464	505.609	215.276	120.946	530.036	529.837	145.183	530.522	485.062	117.161	215.359	215.459			122.991	500.343	543.171	136.958	116.167	211.779	521.181	220.327
Zr	132.583	140.992	138.123	150.148	147.293	128.897	139.85	130.17	124.956	140.957	124.094	123.219	147.067	145.518			138.324	134.064	132.676	130.566	125.683	147.586	139.232	151.749
Y	20.9312	19.8	20.2455	22.2383	19.9485	41.1465	21.7905	21.7905	39.8475	21.8545	19.4522	39.999	20.3985	19.2525			40.9637	19.4036	19.6347	40.9605	35.3667	19.4011	20.2316	20.6932
Nb	8.7665	14.652	14.2065	10.149	15.048	12.1692	9.4525	9.20375	12.1275	9.674	8.40775	11.7907	15.0125	14.8127			12.3418	8.9402	9.0545	12.4748	11.3667	15.1415	9.28683	15.2282
Ga	20.3895	16.731	15.9885	20.5965	16.2855	17.6067	22.5865	21.4423	16.83	21.202	19.2533	16.4672	16.8578	16.3075			17.0073	19.7674	21.6578	16.5775	15.6333	16.0395	21.2601	16.1949
Cu	15.0705	4.653	3.4155	9.4525	4.653	6.633	4.52725	5.4725	15.741	4.6135	11.0943	11.542	4.04075	11.3208			3.80563	9.30427	4.61017	1.8004	3.7	4.02673	8.0596	5.49797
Zn	65.01	66.7755	65.934	67.0132	66.528	68.7285	64.5755	73.033	67.1715	64.211	85.769	91.9878	66.4845	67.1308			70.9426	64.4998	66.665	67.0121	63.3667	64.9578	79.8322	65.2452
Pb	13.79	23.0175	23.166	14.4772	22.968	27.1822	13.9797	12.139	26.7795	14.085	13.9797	27.2133	22.9403	24.2377			26.865	12.736	12.8355	26.8536	24.9333	22.2108	13.0345	21.5784
La	23.246	38.115	37.3725	27.9595	40.986	40.8955	25.5218	25.0242	38.511	26.4095	22.885	38.6557	38.4597	37.014			40.207	23.5751	23.5152	41.5	34.7	39.3368	26.201	41.4861
Ce	49.3485	69.795	72.8145	54.924	71.973	79.157	55.72	51.0932	79.101	52.1278	48.8047	75.8688	70.3465	73.8			82.6176	47.5168	48.3238	82.2	72.8	72.1	48.6575	75.3246
Th	7.289	13.464	13.464	8.0595	14.355	14.9635	7.11425	7.761	14.751	7.8695	6.91525	14.3778	14.1	14.2			14.652	7.1424	7.4625	15.1433	13.5	14.6	7.0716	14.1621
Nd	23.1475	29.205	28.017	26.069	30.294	35.9	26.3675	23.681	35.8875	24.908	22.5865	34.3772	30.845	28.8295			37.1135	20.9312	22.885	36.2724	32.4	30.876	22.9614	31.9
U	2.41325	3.465	3.168	3.184	3.2175	4.88875	3.23375	2.388	4.653	2.25375	1.8905	3.8805	3.19225	3.391			4.1363	1.7856	2.6865	4.73727	3.7	3.02817	1.99	3.16567
						112.29		47.898
LAICPMS																	LAICPMS
La ppm	25.0912	39.6122	38.7805	27.1764	39.6574	40.7494	26.5784	25.6228	40.4383	26.3492	24.0847	39.7529	40.4157	39.3113			41.0954	24.0626	24.3589	41.7618	35.466	39.0632	25.2393	41.2726
Ce ppm	50.34	74.8023	75.4249	55.3648	74.9416	82.7565	53.9482	51.3253	83.2033	53.2456	48.0639	81.0187	75.1548	76.7391			83.3059	48.2748	48.6433	84.3191	74.2193	75.073	49.9432	76.5806
Pr ppm	6.12434	8.79397	8.61517	6.78147	8.87485	9.79448	6.53791	6.29021	9.82339	6.45481	5.87902	9.68104	8.88956	8.59957			9.86189	5.70044	5.80825	9.82987	8.65865	8.49954	5.90213	8.98583
Nd ppm	23.784	30.9167	30.3032	26.0305	31.0724	37.542	25.1399	24.4985	37.2554	25.3364	22.7165	36.6537	31.296	30.2644			37.5232	21.869	22.3512	37.9968	32.8782	30.1915	23.0257	32.2249
Sm ppm	4.84112	5.51388	5.37268	5.3587	5.71083	8.21819	5.15652	5.08835	8.14566	5.14566	4.61909	7.89505	5.62126	5.39357			8.11454	4.54801	4.5441	8.3501	7.09402	5.67364	4.71825	5.7408
Eu ppm	1.57856	1.07695	1.03843	1.63772	1.0778	0.786315	1.64101	1.54682	0.757052	1.6283	1.41164	0.763607	1.1294	1.07904			0.773023	1.45643	1.56824	0.764005	0.698433	1.0706	1.52096	1.13119
Gd ppm	4.31873	4.25346	4.20438	4.70652	4.30261	7.6298	4.68127	4.59126	7.50666	4.60485	4.17925	7.50183	4.31359	4.17496			7.57171	4.04983	4.00993	7.5533	6.54943	4.24308	4.06697	4.49117
Tb ppm	0.690485	0.662564	0.658561	0.746138	0.667831	1.29136	0.729323	0.73604	1.27437	0.730092	0.657368	1.27061	0.682447	0.655176			1.27326	0.638069	0.662855	1.29697	1.15606	0.648366	0.6795	0.691038
Dy ppm	4.06036	3.82894	3.76668	4.4666	3.79884	7.90647	4.37623	4.31776	7.94986	4.35174	3.87142	7.69684	3.94798	3.77572			7.91566	3.92211	3.8998	7.99918	6.83824	3.74107	4.03495	3.98547
Ho ppm	0.803017	0.733707	0.716959	0.87742	0.705349	1.56638	0.838329	0.839893	1.5323	0.842517	0.766442	1.51405	0.742747	0.714852			1.56403	0.737782	0.769393	1.57566	1.37704	0.727306	0.797937	0.747795
Er ppm	2.13	1.95433	1.95063	2.31167	1.95566	4.21184	2.21423	2.18684	4.13642	2.23522	2.03177	4.06569	1.92869	1.86274			4.30134	2.03473	2.03977	4.23017	3.75655	1.96236	2.06922	2.05782
Tm ppm	0.294704	0.291847	0.275288	0.320882	0.28288	0.615785	0.313201	0.324138	0.603009	0.315009	0.295315	0.594702	0.29565	0.283636			0.594804	0.277622	0.282622	0.590114	0.525765	0.283402	0.284661	0.28598
Yb ppm	1.80697	1.82716	1.78705	2.02092	1.80201	3.71079	1.91084	1.91526	3.5955	1.93417	1.75453	3.63983	1.82971	1.79705			3.62482	1.60631	1.75803	3.58279	3.21416	1.76034	1.79496	1.72486
Lu ppm	0.271455	0.275203	0.283759	0.310998	0.275653	0.558145	0.300526	0.300429	0.557378	0.307457	0.264615	0.540012	0.283571	0.289523			0.532764	0.283653	0.273024	0.584429	0.489685	0.283813	0.275763	0.294088
Ba ppm	554.842	967.928	969.498	580.763	957.47	1086.75	573.629	769.9	1085.57	567.642	622.526	1140.31	964.845	970.776			1082.4	527.16	533.547	1086.27	916.754	958.532	566.909	949.287
Th ppm	7.46726	14.5362	14.0953	8.39474	14.9759	15.5669	8.04022	7.30569	15.3658	7.91419	7.32792	15.2021	14.9041	14.7284			15.4877	7.27768	7.24835	15.8825	14.0758	14.8651	7.79416	14.7
Nb ppm	9.37163	14.9636	14.8124	10.4009	15.3199	12.6338	9.54829	9.48477	12.5486	9.55644	8.5498	12.5674	15.2714	15.2509			12.7144	9.13028	9.45289	12.6102	11.9001	15.0007	9.67987	15.2508
Y ppm	20.4697	20.1771	19.8073	22.4187	20.0083	41.0745	21.9961	21.816	40.8597	21.6491	19.7965	40.1019	20.1211	19.7079			40.2671	19.4241	19.3739	40.8906	35.9082	19.633	20.1926	20.281
Hf ppm	3.60069	4.48601	4.40756	4.03317	4.68309	4.76556	3.8122	3.62453	4.60662	3.83278	3.39178	4.5954	4.62489	4.65144			4.88201	3.5838	3.5671	4.62643	4.5254	4.55612	3.76592	4.7488
Ta ppm	0.670641	1.10291	1.06116	0.728696	1.14451	1.08255	0.693689	0.675331	1.05619	0.694516	0.640301	1.06091	1.14072	1.11513			1.06818	0.693135	0.679728	1.04213	0.992938	1.12916	0.6726	1.14394
U ppm	1.74496	3.2341	3.25871	1.93301	3.1429	4.1931	1.89095	1.73607	4.13054	1.86111	1.80417	4.10936	3.29723	3.24806			4.26003	1.70031	1.78145	4.25222	3.55283	3.12607	1.73027	3.22044
Pb ppm	14.0197	23.1354	22.7112	14.5915	22.9982	27.8818	13.8867	12.8412	27.038	13.6453	13.5844	27.8138	22.7725	24.1468			28.2198	13.1219	12.8305	27.5951	25.1142	22.6549	13.3328	22.3531
Rb ppm	70.9014	131.568	135.039	79.3626	127.729	182.372	76.9288	71.1915	180.282	76.841	69.4094	173.951	128.284	129.254			177.064	69.4006	68.3356	177.389	162.57	127.31	71.455	127.64
Cs ppm	11.2807	6.5592	6.77596	10.216	6.60647	13.6178	6.8121	8.75669	17.7001	6.6036	4.871	9.02935	6.59293	6.96036			12.0102	11.6834	3.35818	17.3167	25.9692	6.61777	3.62749	7.30094
Sr ppm	524.087	212.621	213.644	502.298	211.89	118.701	530.326	526.278	146.612	526.193	486.54	117.973	210.687	212.908			120.384	487.888	532.956	133.106	113.633	207.071	513.108	213.268
Sc ppm	12.0512	3.08245	3.21455	12.6477	3.66639	9.83878	12.0945	13.5367	9.74322	11.8773	10.2844	9.65824	3.07254	3.1703			10.2202	11.8748	13.1546	10.1265	9.39876	3.21567	12.0223	3.65563
Zr ppm	132.912	142.735	138.876	149.825	149.196	129.295	140.949	131.079	126.705	139.002	125.097	125.719	147.232	146.478			136.1	131.9	130.947	126.988	123.403	144.338	138.654	150.187
						Sample	CH19C005	CH12020(1)
						Ni	0	1.85757		Ba	916.754	566.909
						Cr	2.66667	9.28653		Cr	2.66667	9.28653
						Sc	9.33333	12.139		Ni	0	1.85757
						V	7	94.0596		Rb ppm	162.57	71.455
						Ba	901.4	562.604		Sr ppm	113.633	513.108
						Rb	165.718	72.7674		V	7	94.0596
						Sr	116.167	521.181		Y	35.9082	20.1926
						Zr	125.683	139.232		Zn	63.3667	79.8322
						Y	35.3667	20.2316		Zr	125.683	139.232
						Nb	11.3667	9.28683		Nb ppm	11.9001	9.67987
										Th ppm	14.0758	7.79416
										U ppm	3.55283	1.73027
						Zn	63.3667	79.8322		Pb ppm	25.1142	13.3328
						Pb	24.9333	13.0345
						La	34.7	26.201		La ppm	35.466	25.2393
						Ce	72.8	48.6575		Ce ppm	74.2193	49.9432
						Th	13.5	7.0716		Pr ppm	8.65865	5.90213
						Nd	32.4	22.9614		Nd ppm	32.8782	23.0257
						U	3.7	1.99		Sm ppm	7.09402	4.71825
										Eu ppm	0.698433	1.52096
										Gd ppm	6.54943	4.06697
										Tb ppm	1.15606	0.6795
										Dy ppm	6.83824	4.03495
										Ho ppm	1.37704	0.797937
										Er ppm	3.75655	2.06922
										Tm ppm	0.525765	0.284661
										Yb ppm	3.21416	1.79496
										Lu ppm	0.489685	0.275763
										Sc ppm	9.39876	12.0223
										Cu	3.7	8.0596
										Ga	15.6333	21.2601
						Ba ppm	916.754	566.909		Cs ppm	25.9692	3.62749
										Hf ppm	4.5254	3.76592
						Nb ppm	11.9001	9.67987		Ta ppm	0.992938	0.6726
						Y ppm	35.9082	20.1926
						Rb ppm	162.57	71.455
						Sr ppm	113.633	513.108
						Zr ppm	123.403	138.654

## Sheet: S2. Glass
Unormalized - EPMA																	Average
Sample	Rock	SiO2	TiO2	Al2O3	FeO	MnO	MgO	CaO	Na2O	K2O	P2O5	Cl	SO3	Total			Sample	Spot	Rocktype	Sc	V	Rb	Sr	Y	Zr	Nb	Ba	La	Ce	Sm	Eu	Dy	Yb	Hf	Pb
CH12022_Glass1	Phase 1	70.2398	0.1518	14.1523	0.9152	0.0706	0.2624	1.383	3.9539	4.1089	0.1048	0.1091	0.0207	95.4725			84014	All	Phase 2	18.4128	0.93796	225.824	107.669	54.7846	119.984	14.7123	1142.86	45.0512	85.4546	9.25342	0.716451	9.56005	4.67757	4.78872	35.0693
CH12022_Glass2	Phase 1	69.9335	0.162	14.286	1.0718	0.0443	0.2828	1.3922	3.8393	3.9759	0.0841	0.0974	0.0399	95.2092			83070	All	Phase 2	11.9231	4.70354	323.262	85.825	22.5303	103.431	22.501	704.613	52.1759	96.3225	4.14788	0.578414	3.50634	2.66196	4.22532	41.4144
CH12022_Glass4	Phase 1	70.1053	0.178	14.3035	1.1006	0.0886	0.2615	1.3975	3.7224	4.1673	0.09	0.101	0.0414	95.5571			CH12021	All	Phase 2	16.4365	1.18935	199.969	102.41	46.9435	107.259	14.5686	1114.1	41.7165	84.4752	8.38949	0.727754	8.36788	4.36522	4.37184	36.6631
CH12022_Glass21	Phase 1	69.9682	0.1668	14.2486	1.0072	0.1199	0.3015	1.3599	4.0967	4.1165	0.0158	0.1176	0.0361	95.5548			CH19C005	All	Phase 2	17.1502	1.27056	236.358	111.238	54.0486	119.252	14.8368	1161.06	45.9699	88.7882	9.09441	0.726055	9.30137	4.66223	4.64807	34.4002
CH12022_Glass30	Phase 1	69.8443	0.1607	14.3517	1.0245	0.0296	0.2516	1.4252	3.6133	4.1338	0.1079	0.1107	0.0162	95.0695			CH19C003	All	Phase 1	10.7405	3.7735	158.853	222.483	24.2832	169.001	18.3065	1130.29	43.852	87.3337	5.92647	1.11749	4.12629	2.15183	5.35693	29.3401
CH12022_Glass33	Phase 1	69.8442	0.1873	14.3423	0.956	0.0723	0.2635	1.3645	3.9653	4.2284	0.1731	0.0999	0.0292	95.526			CH19C009	All	Phase 1	10.4249	3.89234	149.302	229.234	25.6233	198.444	19.1109	1066.98	45.7865	82.1694	6.31634	1.15169	4.40626	2.21749	6.15065	26.2627
CH12022_Glass40	Phase 1	69.6873	0.1636	14.3046	1.0267	0.0757	0.2532	1.4155	3.6913	4.1363	0.1388	0.1104	0.0538	95.0572			CH19C007	All	Andesite	24.3246	50.9262	138.604	348.868	45.6653	346.389	15.84	948.131	45.9533	89.9731	8.87686	1.37045	7.73509	4.02227	8.7443	20.5943
CH12022_Glass41	Phase 1	70.1892	0.1789	14.4094	0.9238	0.0626	0.2782	1.401	3.623	4.0529	0.1052	0.1033	0.0425	95.37			CH12020_1	All	Andesite	20.4325	54.721	114.845	334.631	39.417	282.587	13.8349	839.421	40.3465	71.5334	7.3045	1.17255	6.36517	3.127	6.84949	16.9748
CH12022_glass3	Phase 1	70.0815	0.1701	14.5336	1.0663	0.0793	0.2667	1.3827	3.4575	3.8061	0.0882	0.1093	0.0282	95.0695			83069	All	Andesite	20.6592	55.8352	144.794	342.208	42.2434	305.295	15.2255	910.899	42.9483	78.998	7.24711	1.22774	6.57318	3.27626	6.95762	28.0682
CH19C002_Glass2	Phase 1	70.1481	0.1545	14.3946	1.007	0.0642	0.2715	1.408	3.7635	4.0477	0.0576	0.1195	0.0399	95.4761			CH12020_2	All	Andesite	21.3594	58.7743	124.821	323.222	43.3905	279.993	14.8406	888.559	41.4894	77.8102	7.75776	1.33229	6.80043	3.74105	6.79389	20.096
CH19C002_Glass7	Phase 1	70.2747	0.164	14.5838	1.072	0.1139	0.2915	1.4138	3.6562	4.0511	0.0915	0.1122	0.0033	95.828
CH19C002_Glass8	Phase 1	70.1632	0.1728	14.4747	1.0522	0.0545	0.2937	1.3643	3.7016	4.0859	0.0736	0.1039	0.0318	95.5722
CH19C002_Glass9	Phase 1	69.582	0.1713	14.3872	1.0722	0.099	0.27	1.3802	3.787	4.0853	0.0984	0.1124	0.0133	95.0583			Spots
CH19C002_Glass10	Phase 1	69.9703	0.1622	14.5051	0.9691	0.1139	0.2717	1.4119	3.7363	3.9153	0.0826	0.1093	0.0152	95.2629			Sample	Spot	Rocktype	Si	Ca	Sc	V	Rb	Sr	Y	Zr	Nb	Ba	La	Ce	Sm	Eu	Dy	Yb	Hf	Pb
CH19C002_Glass11	Phase 1	70.0954	0.1553	14.6177	0.9721	0.0726	0.2829	1.3193	3.0366	4.2496	0.0925	0.1111	0.0291	95.0342			84014	84014_gl1	Phase 2	385465	6575.19	17.8734	0.886643	226.858	102.063	51.2911	114.33	14.9087	1229.35	44.4733	89.93	9.96746	0.829188	8.83101	4.53433	4.50827	39.7986
CH19C002_Glass12	Phase 1	69.954	0.1764	14.4173	1.0435	0.0677	0.2845	1.3094	3.6737	4.1599	0.1084	0.0948	0.0221	95.3117			84014	84014_gl2	Phase 2	358562	6575.19	18.449	0.930423	210.199	102.419	52.2502	114.531	13.6919	1105.66	45.9669	85.1873	9.38566	0.885682	9.28949	4.74608	5.43323	33.6797
CH19C002_Glass13	Phase 1	70.2652	0.1965	14.7236	0.9002	0.1255	0.2438	1.4007	3.8591	4.0238	0.1293	0.1039	0.0297	96.0013			84014	84014_gl3	Phase 2	332205	6575.19	16.9533	0.812351	208.388	101.424	49.772	111.519	13.8168	986.941	39.8908	73.4153	4.99799	0.418511	8.13725	4.68372	4.03216	28.7264
CH19C002_Glass14	Phase 1	69.4948	0.172	14.4035	1.012	0.0677	0.2656	1.339	3.9971	4.1218	0.0815	0.097	0.0036	95.0556			84014	84014_gl4	Phase 2	365481	6575.19	19.0185	0	214.415	110.503	58.2157	122.072	13.8361	1164.38	45.3928	82.978	10.8022	0.645041	9.48274	4.44604	5.31615	31.6789
CH19C002_Glass16	Phase 1	70.3335	0.1684	14.2908	1.0294	0.0627	0.2663	1.4468	3.6958	4.018	0.1184	0.1008	0.0065	95.5374			84014	84014_gl5	Phase 2	382790	6575.19	18.9691	1.0862	264.078	117.932	55.1129	123.91	15.985	1191.27	45.1244	90.4279	11.5241	0.679031	9.75666	4.84443	4.3551	34.0011
CH19C002_Glass17	Phase 1	70.2257	0.1724	14.6731	0.9463	0.0413	0.2957	1.4135	3.7506	4.0733	0.1362	0.1049	0.0285	95.8615			84014	84014_gl6	Phase 2	343746	6575.19	17.1497	0.492768	203.981	100.507	53.9287	119.425	13.7084	1066.26	42.2151	80.3324	9.31225	0.766816	9.73791	4.47572	4.28353	30.9079
CH19C002_Glass18	Phase 1	69.829	0.1589	14.4702	1.1009	0.071	0.2977	1.4116	3.7189	4.0393	0.1511	0.1129	0.0269	95.3884			84014	84014_gl7	Phase 2	375203	6575.19	19.6158	1.74516	235.037	112.762	61.2137	120.672	15.8914	1170.87	48.1245	92.0865	9.88207	0.65006	11.1121	4.73595	5.09164	34.0781
CH19C002_Glass19	Phase 1	70.1531	0.1746	14.4862	1.035	0.0776	0.2815	1.375	3.8156	4.0581	0.1024	0.1103	0.0232	95.6926			84014	84014_gl8	Phase 2	316169	6575.19	17.1547	0.731078	187.938	99.4639	52.8307	116.793	13.9409	1094.2	44.3872	77.0297	9.22196	0.761111	8.02551	4.34661	4.41907	26.9789
CH19C002_Glass20	Phase 1	69.93	0.1637	14.6696	1.0266	0.0809	0.3033	1.5048	3.7228	3.9091	0.1492	0.1046	0.0136	95.5782			84014	84014_gl9	Phase 2	362650	6575.19	18.397	0.748924	230.324	111.707	48.7843	121.224	13.1163	1088.46	42.3176	84.7181	8.28377	0.787134	8.28003	4.62448	4.62249	34.2324
CH19C002_Glass21	Phase 1	70.4241	0.1702	14.5728	1.0323	0.0347	0.2693	1.3926	3.8983	3.9878	0.0726	0.1028	0.0276	95.9851			84014	84014_gl10	Phase 2	360226	6575.19	18.3032	0.695981	225.159	109.231	53.1301	116.383	15.3187	1225.43	47.5105	88.2354	9.48437	0.697157	9.61841	4.98788	5.40232	38.1523
CH19C002_Glass22	Phase 1	70.2018	0.1304	14.4689	1.078	0.0908	0.272	1.3448	3.9237	4.0028	0.0577	0.1069	0.0279	95.7057			84014	84014_gl11	Phase 2	362973	6575.19	18.4642	0.958234	235.571	106.351	55.6471	117.35	16.0172	1179.65	46.3691	89.9414	9.74789	0.68301	10.3321	4.61008	5.07388	41.9824
CH19C002_Glass23	Phase 1	70.6283	0.1874	14.5553	1.0294	0.104	0.2793	1.3925	3.7989	4.113	0.0726	0.0994	0.0188	96.2789			84014	84014_gl12	Phase 2	391180	6575.19	18.3429	0.867332	246.125	116.629	50.4757	119.207	14.6858	1230.69	44.7053	89.3635	9.00513	0.858927	8.63988	4.6754	4.68402	42.078
CH19C002_Glass24	Phase 1	69.9899	0.1844	14.6701	1.0664	0.0792	0.3083	1.3458	3.9891	4.0597	0.1024	0.1095	0.0285	95.9333			84014	84014_gl13	Phase 2	322762	6575.19	18.0262	0.823334	190.584	96.7941	50.9087	112.498	14.1924	1091.4	41.5237	86.1395	8.07164	0.730921	10.7549	4.08941	4.30439	30.5694
CH19C002_Glass25	Phase 1	70.3922	0.1509	14.3776	0.998	0.1123	0.2523	1.369	3.6833	3.9105	0.1354	0.1092	-0.0127	95.478			84014	84014_gl13	Phase 2	347340	6575.19	18.3474	1.10629	214.757	99.0708	51.4645	115.39	13.7362	1055.15	42.5233	81.0048	9.57275	0.694522	9.14011	4.27729	5.08463	33.6095
CH19C002_Glass26	Phase 1	69.9628	0.1516	14.461	0.9119	0.1304	0.2965	1.3952	3.9411	4.0269	0.0169	0.1035	0.0229	95.4207			84014	84014_gl14	Phase 2	419470	6575.19	19.6519	1.75846	282.31	115.2	64.3944	120.55	16.7724	1282.09	47.8355	84.0761	8.84032	0.826181	10.2918	4.74552	4.67363	48.6056
CH19C002_Glass27	Phase 1	70.2686	0.1677	14.6661	0.9636	0.0793	0.2596	1.419	3.9099	3.9884	0.0677	0.101	0.0269	95.9178			84014	84014_gl15	Phase 2	379970	6575.19	19.3491	1.31285	238.487	115.041	63.64	148.24	15.9745	1210.39	51.8818	96.8838	10.6693	0.66266	10.8019	5.87498	5.05459	36.7581
CH19C002_Glass28	Phase 1	69.9391	0.1593	14.3416	1.1096	0.0809	0.2833	1.4001	3.6358	4.0967	0.0746	0.1115	0.0202	95.2527			83070	83070_gl2	Phase 2	430961	6575.19	12.3574	5.7867	313.032	83.9219	21.3345	101.394	23.0263	682.151	52.1145	97.2549	3.98411	0.555715	3.20572	2.39718	4.12066	42.8052
CH19C002_Glass29	Phase 1	70.2281	0.1662	14.4073	1.104	0.0644	0.286	1.395	3.7314	4.0915	0.0855	0.1022	0.0013	95.6629			83070	83070_gl3	Phase 2	451617	6575.19	13.8629	5.28039	347.118	83.8682	23.3914	105.43	24.5476	739.557	52.4978	105.002	3.99679	0.550975	3.53207	2.75051	4.14638	45.6482
CH19C002_Glass30	Phase 1	69.9983	0.171	14.5663	1.0467	0.071	0.2846	1.3533	3.9589	4.2319	0.0924	0.093	0.0194	95.8868			83070	83070_gl4	Phase 2	503284	6575.19	14.0363	5.30022	391.139	84.7179	22.8033	106.286	25.3502	701.278	57.4185	105.021	4.50002	0.51914	4.20244	2.93394	4.44896	46.9744
83070_glass1	Phase 2	72.6123	0.074	13.1255	1.3089	0.0252	0.0318	0.8905	2.3637	5.1316	0.0398	0.0862	0.0026	95.6921			83070	83070_gl5	Phase 2	457621	6575.19	12.8749	4.64927	348.246	88.117	24.6508	109.116	24.0204	779.763	56.5725	104.205	4.95674	0.606912	3.40711	2.88885	3.77389	44.4623
83070_glass5	Phase 2	72.9201	0.0688	13.1059	1.3195	0.0065	0.0522	0.8924	2.6465	5.5482	0.0228	0.0834	0.003	96.6693			83070	83070_gl6	Phase 2	454768	6575.19	11.8714	4.66526	345.061	90.4181	21.5864	101.609	24.2323	733.183	50.3591	99.6308	4.5266	0.583616	3.65056	2.73325	4.41729	49.3663
83070_glass6	Phase 2	73.2971	0.0655	12.9606	1.3189	0.0284	0.064	0.8353	2.4422	5.8895	0.0333	0.0965	0.0058	97.0371			83070	83070_gl7	Phase 2	407898	6575.19	11.7941	4.94815	308.99	75.8589	20.5143	96.5079	21.4216	634.917	50.6976	92.4955	3.85865	0.572406	3.13162	2.74485	4.31084	38.3228
83070_glass7	Phase 2	73.0297	0.0728	13.0123	1.2936	0.0197	0.0452	0.7959	2.4714	5.6269	0.0224	0.0836	0	96.4735			83070	83070_gl10	Phase 2	370610	6575.19	10.316	4.07501	286.491	91.382	26.081	116.673	21.0067	720.988	54.0949	92.0196	4.67452	0.740488	3.77574	3.02732	4.60543	33.498
83070_carbglass5	Phase 2	73.2009	0.0722	12.928	1.2841	0.0242	0.0398	0.8158	2.5296	5.5517	0.0303	0.0847	0.0057	96.567			83070	83070_gl11	Phase 2	451684	6575.19	11.6769	4.29229	319.821	87.9652	22.5932	104.053	22.9424	712.135	52.244	94.2967	4.22234	0.612976	3.43742	2.70991	4.37563	42.0973
83070_carbglass6	Phase 2	71.6383	0.0646	12.8654	1.3025	0.0316	0.058	0.9493	2.3646	5.805	0.0301	0.0859	0.0072	95.2025			83070	83070_gl12	Phase 2	466634	6575.19	12.5107	5.05068	345.92	86.9465	24.2191	105.282	24.0785	754.478	55.5515	103.689	4.28663	0.624916	3.97779	2.70398	4.14085	42.9848
83070_carbglass7	Phase 2	72.8792	0.0745	12.9961	1.2346	0.029	0.0422	0.8755	2.5243	5.4568	0.0291	0.0835	0.0005	96.2253			83070	83070_gl14	Phase 2	423051	6575.19	11.7214	4.40764	321.737	88.8841	22.6248	106.879	21.8469	735.036	53.4408	100.431	3.72009	0.60618	3.44104	2.67633	4.42051	39.7483
83070_carbglass9	Phase 2	72.7305	0.0407	13.1068	0.9347	0.0454	0.0277	0.959	2.5364	5.4554	0.0313	0.4729	0.0153	96.3561			83070	83070_gl15	Phase 2	397950	6575.19	11.8722	4.35491	319.728	82.656	21.6534	104.806	21.7896	713.549	52.9189	95.4478	3.83918	0.481827	3.34342	2.61593	4.3399	38.8363
83070_carbglass10	Phase 2	74.6675	0.0718	13.3687	1.2634	0.0302	0.0551	0.9425	2.4995	5.5975	0.0598	0.0875	0.0023	98.6458			83070	83070_gl16	Phase 2	321190	6575.19	8.18314	3.63199	231.865	85.1639	18.9116	83.1321	15.7492	548.324	38.2002	66.3764	3.20895	0.485819	2.97117	1.76146	3.60354	32.2288
CH12021_glass1	Phase 2	71.4497	0.0717	13.0674	1.3311	0.0213	0.0615	0.8809	2.1651	5.8224	0.0274	0.2258	0	95.1243			CH12021	CH12021_gl1	Phase 2	377406	6718.12	17.5655	1.36959	227.413	100.912	45.1664	102.02	14.494	1021.82	46.068	81.2796	7.8432	0.595159	7.96667	3.98044	4.24246	65.9969
CH12021_glass2	Phase 2	72.2026	0.0731	12.9935	1.3357	0.0406	0.0445	0.8891	2.6674	5.3755	0.0107	0.082	0.0029	95.7176			CH12021	CH12021_gl2	Phase 2	422736	6718.12	18.5978	1.0917	220.796	102.952	48.0934	107.898	16.4484	1202.48	43.1758	91.4401	8.63981	0.663982	8.64963	4.85814	4.67133	36.2635
CH12021_glass3	Phase 2	72.3356	0.0704	13.0906	1.3101	0.0397	0.059	0.9248	2.4927	5.4888	0.0214	0.0893	0.0072	95.9296			CH12021	CH12021_gl3	Phase 2	307080	6718.12	14.4183	1.30258	176.924	112.682	50.1731	110.16	12.8205	1022.67	41.9351	73.7218	8.92255	0.678708	9.334	4.79502	3.96246	30.733
CH12021_glass5	Phase 2	72.0638	0.0723	12.8706	1.2979	0.0268	0.0212	0.8804	2.5601	5.2752	0.015	0.0859	0.0056	95.1748			CH12021	CH12021_gl4	Phase 2	338573	6718.12	17.0987	1.4106	231.945	110.049	52.259	118.439	14.9652	1105.94	42.9964	81.7252	9.56084	0.706518	8.61254	4.25729	4.88236	41.1214
CH19C007_glass11	Andesite	66.8541	0.4293	15.6685	3.4386	0.0527	0.6569	2.8314	3.3293	3.7601	0.2465	0.0395	0.0201	97.327			CH12021	CH12021_gl5	Phase 2	257107	6718.12	13.1467	1.41903	171.306	108.084	34.1538	98.0849	12.1106	762.893	29.3749	53.9188	6.91774	0.665404	6.75368	2.94114	3.24176	23.3814
CH19C007_glass14	Andesite	66.3635	0.4429	15.9419	3.3705	0.0544	0.6381	3.2088	3.5432	3.7285	0.2817	0.0412	-0.0002	97.6145			CH12021	CH12021_gl6	Phase 2	281609	6718.12	16.2653	2.33787	200.766	131.042	50.3889	112.812	12.8198	1020.98	43.1507	74.9838	5.89659	0.759199	8.41009	4.05851	4.2908	26.0715
CH19C007_glass15	Andesite	65.3208	0.448	14.7964	3.7747	0.0725	0.9523	2.7027	3.2341	3.9141	0.2846	0.0581	0.0111	95.5694			CH12021	CH12021_gl7	Phase 2	303530	6718.12	14.2792	0.86584	194.042	81.7056	36.83	84.8139	12.5904	1029.93	35.9755	81.2149	7.4304	0.649186	6.48216	3.51928	3.83053	38.705
CH19C007_glass16	Andesite	65.2248	0.4342	17.2079	3.091	0.0692	0.6387	4.118	3.1878	3.4096	0.3286	0.0514	0.0038	97.765			CH12021	CH12021_gl8	Phase 2	384028	6718.12	17.078	0.734304	202.032	94.8063	46.6655	105.028	16.0122	1207.69	42.8263	92.172	9.10988	0.748839	7.93601	4.66777	4.71254	38.5461
CH19C007_glass19	Andesite	67.0442	0.4247	16.2507	3.457	0.1104	0.6124	3.3719	2.6416	3.3165	0.1559	0.0499	0.0196	97.4548			CH12021	CH12021_gl9	Phase 2	366273	6718.12	17.4779	0.805496	194.246	98.1621	50.1711	112.786	16.4022	1247.04	44.0912	95.6326	9.44008	0.777579	8.63552	4.4221	4.78436	35.5786
CH19C007_glass21	Andesite	66.5508	0.4477	15.7997	3.2677	0.0857	0.6714	3.2861	3.3763	3.5967	0.3153	0.054	0.0071	97.4585			CH12021	CH12021_gl10	Phase 2	336514	6718.12	16.1226	1.89204	188.929	108.454	55.5285	121.671	12.5532	1177.14	46.4773	78.4053	9.87073	0.702474	9.89077	5.49605	5.03798	30.2915
CH19C007_glass28	Andesite	64.9327	0.4465	17.0103	3.6957	0.0264	1.1032	4.1238	3.5833	3.3394	0.2418	0.0394	0.0011	98.5436			CH12021	CH12021_gl11	Phase 2	360481	6718.12	16.4908	0.686009	191.744	93.7402	45.2242	104.23	15.414	1158.67	41.8675	95.7354	8.14528	0.855693	8.45243	4.61605	4.53765	35.9835
CH12020-2_glass2	Andesite	65.5913	0.5286	15.3737	3.6825	0.0421	0.9541	3.1874	2.9673	3.4687	0.4025	0.0497	0.0126	96.2605			CH12021	CH12021_gl12	Phase 2	386765	6718.12	17.6779	0.89765	210.143	95.5916	47.2467	109.887	16.903	1286.63	42.1051	101.917	8.39233	0.816855	8.83536	4.82503	4.33054	37.98
CH12020-2_glass3	Andesite	65.1235	0.469	15.4439	3.3413	0.0576	0.9023	3.0846	3.0189	3.291	0.3186	0.09	0.0385	95.1792			CH12021	CH12021_gl13	Phase 2	374469	6718.12	17.456	0.648909	189.313	93.1452	48.3647	106.535	15.8581	1239.45	42.2703	96.0313	8.89398	0.841205	8.82354	4.3111	4.30921	35.9677
CH12020-2_glass4	Andesite	65.2052	0.5412	15.3498	3.6826	0.0778	0.8577	3.0803	3.2024	3.5446	0.3796	0.0509	0.0136	95.9857			CH19C005	CH19C005_gl1	Phase 2	376735	7146.94	18.0749	1.01233	306.581	114.551	53.1365	118.693	13.215	1057.87	43.7833	79.525	8.76883	0.522359	8.00415	4.661	4.54535	34.466
CH12020-2_glass7	Andesite	65.2584	0.5456	15.5261	3.6243	0.0447	0.8297	3.1154	2.9955	3.4558	0.3659	0.0526	0.0252	95.8392			CH19C005	CH19C005_gl2	Phase 2	347016	7146.94	16.0203	1.22564	270.856	116.705	59.3812	122.777	15.5009	1206.49	47.0913	90.9338	9.7775	0.831268	9.44635	4.85342	4.74419	37.2576
CH12020-2_glass8	Andesite	65.1489	0.5224	15.3981	3.5463	0.0636	0.8412	3.02	2.8341	3.3687	0.3785	0.0522	0.015	95.189			CH19C005	CH19C005_gl3	Phase 2	368460	7146.94	17.7952	1.52805	228.186	98.4739	50.689	107.651	16.6967	1190.35	42.3167	93.8074	8.86244	0.646304	9.6223	5.36453	4.27752	43.6257
CH12020-2_glass9	Andesite	64.9854	0.5371	15.5234	3.8438	0.0546	0.8863	3.1222	2.8659	3.5444	0.4049	0.0571	0.017	95.8421			CH19C005	CH19C005_gl4	Phase 2	273648	7146.94	16.8944	0.26687	186.943	114.729	56.0605	125.219	13.8248	1224.84	48.1461	88.1792	8.13655	0.922397	9.0002	3.42533	3.53018	22.1284
CH12020-2_glass10	Andesite	65.1304	0.5362	15.3792	3.8831	0.0639	0.91	3.0833	2.9697	3.384	0.3766	0.056	0.0184	95.7908			CH19C005	CH19C005_gl5	Phase 2	351931	7146.94	17.4593	0.98551	241.839	108.688	58.5637	126.958	14.9452	1197.01	51.4616	88.9041	10.2354	1.05606	10.3983	4.44619	4.95013	29.4536
CH12020-2_glass11	Andesite	65.4475	0.54	15.5044	3.8142	0.063	0.913	3.1894	2.9924	3.2769	0.3857	0.0584	0.0218	96.2067			CH19C005	CH19C005_gl6	Phase 2	301669	7146.94	15.9492	0.392921	201.003	105.313	55.895	120.504	14.8747	1108.38	47.8806	84.1219	9.46	0.600838	10.5162	4.96387	4.94385	25.5868
CH12020-2_glass12	Andesite	65.1817	0.5277	15.4116	3.9116	0.0697	0.9052	3.1683	2.7793	3.3812	0.382	0.0654	0.0177	95.8014			CH19C005	CH19C005_gl7	Phase 2	381897	7146.94	20.0603	0.880834	253.544	111.235	54.6742	122.022	15.9381	1189.32	47.5555	91.8432	9.26576	0.677338	9.13784	5.46884	4.80523	39.9512
CH12020-2_glass13	Andesite	65.1904	0.5369	15.3762	3.7162	0.0553	0.9266	3.2066	2.9921	3.3174	0.383	0.0458	0.0127	95.7592			CH19C005	CH19C005_gl8	Phase 2	282514	7146.94	15.4825	1.78229	247.17	118.899	38.511	84.2653	12.4987	821.261	32.0728	57.9076	8.40944	0.605081	5.77823	3.39806	4.13524	23.8668
CH12020-2_glass14	Andesite	65.4779	0.5322	15.4963	3.7642	0.0594	0.8674	3.2707	3.1447	3.2875	0.4115	0.059	0.0065	96.3773			CH19C005	CH19C005_gl9	Phase 2	361592	7146.94	15.6865	1.6493	205.736	108.803	51.1262	110.967	14.9855	1203.56	44.0485	91.555	7.25505	0.786629	8.4187	4.77545	4.77282	40.9941
CH12020-2_glass15	Andesite	65.49	0.5368	15.4579	3.5469	0.0624	0.8402	3.1496	2.9431	3.4461	0.3772	0.0497	0.0108	95.9107			CH19C005	CH19C005_gl10	Phase 2	351565	7146.94	18.2722	1.14488	233.947	122.775	58.1327	130.295	14.9982	1227.16	49.9412	91.0386	9.60554	0.623968	9.81021	4.95992	4.79158	34.7056
CH12020-2_glass18	Andesite	65.383	0.5302	15.4198	3.573	0.0663	0.8944	3.1792	3.0981	3.4289	0.3748	0.0537	0.0163	96.0177			CH19C005	CH19C005_gl11	Phase 2	373551	7146.94	18.6436	2.86849	281.65	119.956	60.9273	157.054	16.5913	1237.54	51.5578	107.36	7.80353	0.674142	14.6347	3.4129	4.23756	39.8608
CH12020-2_glass19	Andesite	64.9207	0.5194	15.6113	3.3902	0.0637	0.8737	3.2087	3.0798	3.4756	0.3954	0.057	0.0293	95.6248			CH19C005	CH19C005_gl12	Phase 2	451436	7146.94	17.4374	1.97071	313.546	132.264	62.4868	130.84	13.2765	1172.73	49.1629	95.0608	9.9169	1.16386	6.24528	5.49505	5.16582	34.3628
CH12020-2_glass20	Andesite	65.3439	0.5134	15.432	3.4714	0.0592	0.8672	3.1027	3.0443	3.4825	0.3435	0.0671	0.0332	95.7604			CH19C005	CH19C005_gl13	Phase 2	318102	7146.94	16.2457	1.41493	187.615	102.445	48.1756	110.084	16.3813	1275.32	45.4082	99.0342	9.33623	0.722864	8.86807	4.66942	4.26696	38.063
CH12020_carbglass1	Andesite	65.099	0.5353	15.2807	3.9375	0.0504	0.8569	3.1101	3.0052	3.4783	0.3718	0.0628	0.0205	95.8085			CH19C005	CH19C005_gl14	Phase 2	450224	7146.94	19.281	1.25627	244.223	104.088	50.4771	115.39	18.1407	1305.67	47.0731	104.959	10.2486	0.688423	9.17961	5.15652	5.67483	47.4568
CH12020_carbglass2	Andesite	64.4096	0.5562	15.2972	4.0455	0.0584	0.9644	3.3949	3.235	3.3859	0.3889	0.0679	0.0281	95.832			CH19C005	CH19C005_gl15	Phase 2	364992	7146.94	17.3647	1.12104	210.263	113.744	52.7895	117.272	16.2835	1228.05	45.9136	90.1962	10.0581	0.887723	10.7712	4.94061	5.18499	41.4566
CH12020_carbglass3	Andesite	65.5263	0.5271	15.4581	3.665	0.0591	0.8752	3.1651	2.9304	3.4736	0.3717	0.0625	0.025	96.1391			CH19C005	CH19C005_gl16	Phase 2	296826	7146.94	14.2309	1.18359	204.386	103.35	45.1524	109.234	11.4179	943.284	41.6152	69.8132	6.10249	0.299598	7.19784	3.77425	3.65989	22.8447
CH12020_carbglass4	Andesite	65.1475	0.238	15.3628	3.7027	0.0533	0.9247	3.48	3.1028	3.2984	0.407	0.0281	0.0163	95.7616			CH19C005	CH19C005_gl17	Phase 2	284755	7146.94	16.6544	0.915786	200.592	95.0185	62.6466	118.054	12.657	1149.12	46.4597	85.1606	11.3627	0.634083	11.0941	5.49258	5.33106	28.7228
CH12020_carbglass6	Andesite	65.3308	0.3525	15.1034	2.886	0.0459	0.877	3.1012	3.0849	3.4674	0.2663	0.9537	0.0093	95.4784			CH19C003	CH19C003_gl1	Phase 1	365733	10291.6	11.4648	3.54657	162.314	213.308	21.9089	151.353	17.8873	1084.94	40.5692	88.28	5.67585	1.11206	3.75016	1.5344	5.47195	32.1626
CH12020_carbglass8	Andesite	65.6094	0.5337	15.3562	3.7904	0.0562	0.8667	3.146	2.9346	3.496	0.3914	0.0558	0.0155	96.2519			CH19C003	CH19C003_gl2	Phase 1	398949	10291.6	12.951	4.67825	178.419	203.089	22.1219	163.477	18.7647	1160.66	45.2875	86.3771	6.35777	1.28509	4.41995	2.04424	5.63646	38.7762
CH12020_carbglass9	Andesite	66.0231	0.5244	15.5617	3.4444	0.071	0.8486	3.3091	2.8532	3.3983	0.426	0.0624	0.0153	96.5375			CH19C003	CH19C003_gl3	Phase 1	361036	10291.6	11.7711	3.64329	159.934	223.98	24.4623	166.264	17.7704	1131.03	46.0972	87.7141	6.81647	1.08334	4.05663	2.14205	5.16657	26.9705
																	CH19C003	CH19C003_gl4	Phase 1	331838	10291.6	10.3283	3.46184	132.763	198.235	23.24	171.398	14.3121	960.172	43.2345	75.4704	5.43098	0.829323	3.76532	2.01581	5.11114	25.5291
Normalized - EPMA - Anhydrous																	CH19C003	CH19C003_gl5	Phase 1	374733	10291.6	10.1494	3.74542	161.154	217.772	23.4152	162.28	19.2191	1151.25	42.4186	92.3764	6.0701	1.03126	4.25992	1.85536	4.70163	29.2419
Sample	Rock	SiO2	TiO2	Al2O3	FeO	MnO	MgO	CaO	Na2O	K2O	P2O5	Total					CH19C003	CH19C003_gl6	Phase 1	395869	10291.6	12.6166	3.95652	183.409	229.139	24.2208	162.553	20.4544	1183.1	44.2108	99.1949	5.31867	1.33024	4.04474	2.24218	4.8807	29.1167
CH12022_Glass1	Phase 1	73.6709	0.159215	14.8436	0.959906	0.0740487	0.275218	1.45056	4.14704	4.30961	0.109919	100		0.777174	0.754634	0.808017	CH19C003	CH19C003_gl7	Phase 1	323937	10291.6	9.76108	3.68141	145.622	220.901	28.076	192.993	17.1106	1080.46	45.072	84.7761	6.79053	1.0665	5.01724	3.21395	6.17419	27.6917
CH12022_Glass2	Phase 1	73.5585	0.170397	15.0265	1.12736	0.0465963	0.297459	1.46437	4.03831	4.18199	0.0884594	100		0.79123			CH19C003	CH19C003_gl8	Phase 1	353840	10291.6	10.5026	4.29716	153.013	222.027	24.4528	170.06	18.5059	1109.76	43.0664	84.4509	6.38563	1.14662	4.75951	2.59062	6.08074	28.4372
CH12022_Glass4	Phase 1	73.4743	0.186554	14.9909	1.15349	0.0928578	0.274067	1.46466	3.90129	4.36757	0.0943251	100		0.808017			CH19C003	CH19C003_gl9	Phase 1	344068	10291.6	9.6121	3.47501	148.538	276.055	27.138	185.069	17.1611	1391.41	46.213	81.964	5.58258	1.4284	4.20401	2.10457	5.97767	30.7841
CH12022_Glass21	Phase 1	73.3411	0.174841	14.9355	1.05575	0.12568	0.316034	1.42546	4.29419	4.31494	0.0165617	100		0.769619	0.786411		CH19C003	CH19C003_gl10	Phase 1	372968	10291.6	9.80853	3.63998	148.568	245.475	27.6643	194.711	18.6896	1146.98	50.0324	88.3154	5.69653	1.20431	4.52441	2.27916	5.47775	33.8941
CH12022_Glass30	Phase 1	73.5648	0.16926	15.1162	1.07907	0.0311767	0.265002	1.50112	3.80577	4.354	0.113648	100		0.802837			CH19C003	CH19C003_gl11	Phase 1	363230	10291.6	10.3729	4.01895	162.762	218.771	22.1397	151.566	18.7698	1092.97	39.181	89.0171	6.17846	1.11086	2.99887	1.92431	4.96798	28.4437
CH12022_Glass33	Phase 1	73.2143	0.196338	15.0343	1.00213	0.0757886	0.276214	1.43034	4.15663	4.43243	0.181452	100		0.783928			CH19C003	CH19C003_gl12	Phase 1	341393	10291.6	9.88081	3.69247	149.867	224.274	23.6864	168.693	17.7375	1100.54	45.1296	83.3769	5.909	1.06765	3.98301	1.98583	5.40679	25.5011
CH12022_Glass40	Phase 1	73.4378	0.172405	15.0745	1.08196	0.0797741	0.266827	1.49168	3.88996	4.35891	0.14627	100		0.802172			CH19C003	CH19C003_gl13	Phase 1	393461	10291.6	10.8076	3.66838	168.725	227.35	22.9119	166.557	18.8426	1168.44	43.3194	88.2735	5.54006	1.07891	4.02159	2.08655	5.06987	28.7219
CH12022_Glass41	Phase 1	73.7094	0.187872	15.1321	0.970132	0.0657396	0.292153	1.47126	3.80471	4.25617	0.110476	100		0.768552			CH19C003	CH19C003_gl14	Phase 1	376500	10291.6	11.0865	4.03997	165.249	201.58	23.4896	153.724	20.6702	1137.46	43.2732	93.8094	5.73747	0.880593	3.5241	2.20189	5.28902	29.0032
CH12022_glass3	Phase 1	73.8228	0.179181	15.3095	1.12323	0.0835335	0.280938	1.45652	3.64208	4.00929	0.0929086	100		0.799925			CH19C003	CH19C003_gl16	Phase 1	359505	10291.6	9.99433	3.05719	162.459	215.286	25.3209	174.315	18.7023	1055.21	40.6755	86.6094	5.40699	1.10714	4.56484	2.05658	4.94142	25.8272
CH19C002_Glass2	Phase 1	73.5948	0.162091	15.1019	1.05648	0.0673544	0.28484	1.47718	3.94842	4.24658	0.0604301	100		0.787642			CH19C009	CH19C009_gl1	Phase 1	348154	10363.1	8.99251	3.34513	146.22	234.49	26.1649	195.232	18.4397	1068.12	43.0658	81.3009	5.77178	1.53908	4.32534	1.97414	5.72242	30.5658
CH19C002_Glass7	Phase 1	73.4227	0.171346	15.2371	1.12002	0.119002	0.304558	1.47713	3.81998	4.23257	0.0955988	100		0.786212			CH19C009	CH19C009_gl2	Phase 1	347191	10363.1	11.0438	3.95852	151.158	225.727	29.5267	212.301	19.8597	1120.49	53.6325	81.914	8.62859	1.32619	5.55856	2.40272	6.08471	25.2122
CH19C002_Glass8	Phase 1	73.5182	0.181063	15.1668	1.10251	0.057106	0.307744	1.42954	3.8786	4.28128	0.0771193	100		0.781782			CH19C009	CH19C009_gl3	Phase 1	364289	10363.1	10.138	3.52385	151.064	232.894	26.3452	186.902	18.8477	1139.79	46.6426	83.043	7.19155	1.2643	4.48259	2.21735	7.02193	28.9201
CH19C002_Glass9	Phase 1	73.2962	0.180444	15.1552	1.12943	0.104285	0.284412	1.45387	3.98915	4.30337	0.103652	100		0.798838			CH19C009	CH19C009_gl4	Phase 1	398024	10363.1	11.857	4.07659	161.457	239.312	29.9056	250.527	20.1816	1113.23	54.3458	83.9602	6.62568	1.05556	5.11022	2.28413	6.80247	23.0606
CH19C002_Glass10	Phase 1	73.5458	0.170488	15.2463	1.01862	0.11972	0.285584	1.48405	3.92723	4.11537	0.0868209	100		0.781028			CH19C009	CH19C009_gl5	Phase 1	327121	10363.1	9.95336	3.76155	145.699	232.042	27.3033	189.542	17.9878	1057.54	50.7589	83.2628	6.51451	1.37277	4.86616	2.07513	5.62942	26.7449
CH19C002_Glass11	Phase 1	73.8671	0.163656	15.4042	1.02441	0.0765064	0.298122	1.39029	3.19999	4.47826	0.0974772	100		0.774582			CH19C009	CH19C009_gl6	Phase 1	354167	10363.1	11.3348	3.83685	149.003	221.363	27.5237	214.361	19.7179	1005.44	53.4528	75.5299	6.83031	1.22306	4.57518	2.3846	6.07327	22.7832
CH19C002_Glass12	Phase 1	73.4851	0.185304	15.145	1.09617	0.0711173	0.298861	1.3755	3.85914	4.36988	0.113872	100		0.785768			CH19C009	CH19C009_gl7	Phase 1	363927	10363.1	10.6146	4.03706	136.303	235.982	24.7837	253.874	20.3417	980.401	42.839	73.7363	6.16043	1.08862	4.06864	2.4802	7.92736	27.3225
CH19C002_Glass13	Phase 1	73.2939	0.20497	15.3582	0.939002	0.13091	0.254309	1.46108	4.02544	4.19724	0.134873	100		0.786888			CH19C009	CH19C009_gl8	Phase 1	371336	10363.1	10.1925	3.18049	154.437	221.632	24.3705	204.369	19.2515	1002.52	42.9654	73.0848	5.65207	1.16622	4.40577	2.56322	6.08794	24.7939
CH19C002_Glass14	Phase 1	73.1871	0.181138	15.1688	1.06577	0.0712969	0.279711	1.41014	4.20947	4.34079	0.0858301	100		0.79211			CH19C009	CH19C009_gl9	Phase 1	367159	10363.1	10.5672	3.83508	159.149	217.571	22.7823	160.133	18.3951	1093.3	41.2975	91.1376	5.70087	1.02253	4.40151	1.6307	5.72434	29.1441
CH19C002_Glass16	Phase 1	73.7016	0.176464	14.9751	1.0787	0.0657025	0.279052	1.51608	3.87278	4.21041	0.12407	100		0.794474			CH19C009	CH19C009_gl10	Phase 1	355432	10363.1	10.2088	3.97582	154.283	222.5	22.6674	163.814	18.6705	1115.46	43.2438	93.1081	5.61416	1.03938	4.99673	2.44726	4.87775	26.709
CH19C002_Glass17	Phase 1	73.3595	0.180093	15.3279	0.988529	0.043143	0.308896	1.47658	3.91797	4.25507	0.142278	100		0.761916			CH19C009	CH19C009_gl14	Phase 1	341758	10363.1	10.4572	3.02611	140.553	239.977	27.6046	216.83	19.8378	1069.66	45.7589	83.5694	5.43732	1.16046	4.17307	2.29392	7.28697	21.6678
CH19C002_Glass18	Phase 1	73.3124	0.166827	15.192	1.15582	0.0745418	0.312551	1.48202	3.90441	4.2408	0.158638	100		0.787144			CH19C009	CH19C009_gl15	Phase 1	346468	10363.1	10.2443	3.27018	151.154	213.172	20.9348	151.564	17.1767	1097.58	41.6269	84.9211	5.77731	1.15535	3.88969	2.08873	4.51446	29.3283
CH19C002_Glass19	Phase 1	73.4133	0.182714	15.1594	1.0831	0.0812063	0.294582	1.4389	3.99292	4.24669	0.107159	100		0.786175			CH19C009	CH19C009_gl16	Phase 1	352966	10363.1	10.074	3.8151	156.963	222.007	22.7829	161.552	19.0964	1106.22	42.1645	90.4614	6.59132	1.18329	3.51522	1.94663	5.79557	28.6473
CH19C002_Glass20	Phase 1	73.2558	0.171485	15.3673	1.07542	0.0847475	0.317725	1.57637	3.89985	4.09501	0.156296	100		0.771938			CH19C009	CH19C009_gl17	Phase 1	310534	10363.1	9.09825	3.53166	144.617	241.894	27.8292	196.267	17.067	1091.23	48.9173	81.3753	6.46652	1.24133	4.27702	2.46879	6.05405	24.6073
CH19C002_Glass21	Phase 1	73.4696	0.17756	15.203	1.07694	0.0362006	0.280946	1.45282	4.06688	4.16026	0.0757396	100		0.793101			CH19C009	CH19C009_gl18	Phase 1	314304	10363.1	10.2247	3.7184	142.756	226.786	27.3401	195.646	16.4692	1045.81	44.8401	86.9326	6.81963	1.16442	4.04945	2.48662	6.37444	24.6202
CH19C002_Glass22	Phase 1	73.4552	0.136443	15.1394	1.12796	0.095008	0.284605	1.40712	4.10554	4.1883	0.060374	100		0.798519			CH19C009	CH19C009_gl19	Phase 1	317186	10363.1	10.0866	3.30357	138.979	246.689	27.8272	205.661	20.4043	1154.96	50.0201	88.0288	6.78409	0.870434	5.23657	2.35524	6.25634	25.2461
CH19C002_Glass23	Phase 1	73.4482	0.194882	15.1364	1.0705	0.108152	0.290451	1.4481	3.95057	4.27722	0.0754986	100		0.786582			CH19C009	CH19C009_gl20	Phase 1	395768	10363.1	12.1349	7.97379	154.331	222.949	19.904	214.978	23.1401	876.945	32.798	61.5137	4.81169	0.705732	2.97462	1.59794	6.32759	27.0922
CH19C002_Glass24	Phase 1	73.0619	0.192494	15.314	1.11321	0.0826763	0.321832	1.40487	4.16419	4.23789	0.106895	100		0.775733			CH19C007	CH19C007_gl2	Andesite	389566	24799.9	24.588	51.8949	138.545	348.208	46.4963	348.167	16.7746	983.461	48.0516	85.7586	7.82852	1.54696	7.55079	3.48628	7.43878	20.2906
CH19C002_Glass25	Phase 1	73.8007	0.158207	15.0738	1.04632	0.117738	0.264517	1.43529	3.86165	4.09985	0.141956	100		0.798208			CH19C007	CH19C007_gl3	Andesite	373010	24799.9	25.8782	47.1197	145.426	361.423	48.1688	352.068	16.4535	975.639	48.8431	87.8368	9.23961	1.48686	7.56214	4.17053	8.84223	20.8492
CH19C002_Glass26	Phase 1	73.4176	0.159086	15.1751	0.95693	0.136839	0.311141	1.4641	4.13571	4.22575	0.0177345	100		0.754634			CH19C007	CH19C007_gl5	Andesite	305303	24799.9	20.8388	51.1063	113.247	349.045	50.6856	320.795	12.269	948.453	41.4585	89.1275	9.5634	1.27829	7.64181	4.1857	9.92786	18.8833
CH19C002_Glass27	Phase 1	73.357	0.175071	15.3107	1.00595	0.0827853	0.27101	1.48137	4.08175	4.1637	0.0706755	100		0.78777			CH19C007	CH19C007_gl12	Andesite	310251	24799.9	19.2522	45.6931	120.824	310.647	32.1374	242.767	13.5982	805.232	36.7136	70.7027	5.87565	1.29111	6.89872	3.7264	6.22245	16.1637
CH19C002_Glass28	Phase 1	73.5265	0.167471	15.0772	1.16651	0.0850496	0.297831	1.47191	3.82229	4.30683	0.0784264	100		0.796611			CH19C007	CH19C007_gl14	Andesite	423478	24799.9	26.3644	59.474	155.109	361.527	50.8695	452.056	19.0199	981.642	53.1243	118.901	11.5399	1.51443	8.16892	3.49612	11.8332	27.7177
CH19C002_Glass29	Phase 1	73.4916	0.173923	15.0768	1.1553	0.0673926	0.29929	1.45982	3.9048	4.28163	0.0894731	100		0.794245			CH19C007	CH19C007_gl15	Andesite	388133	24799.9	29.0262	50.2692	158.472	362.358	45.6344	362.482	16.9249	994.36	47.529	87.5125	9.21407	1.10507	8.58819	5.06858	8.20128	19.6611
CH19C002_Glass30	Phase 1	73.0866	0.178545	15.209	1.09288	0.0741325	0.297157	1.41301	4.13357	4.41861	0.0964767	100		0.786224			CH12020_1	CH12020_1_gl1	Andesite	308359	23513.4	21.259	61.0312	114.72	318.877	42.6333	263.864	13.7069	883.115	37.4228	75.2795	6.8847	1.14277	7.0557	2.85822	7.88226	16.864
83070_glass1	Phase 2	75.9517	0.0774032	13.7291	1.36909	0.0263589	0.0332625	0.931453	2.4724	5.3676	0.0416304	100		0.976281	0.95372	0.983928	CH12020_1	CH12020_1_gl2	Andesite	284063	23513.4	20.2964	54.2019	110.474	338.092	39.0522	281.728	13.4703	863.114	40.7318	70.7054	7.28996	1.27606	6.29286	3.23038	6.81289	17.0539
83070_glass5	Phase 2	75.5	0.0712341	13.5696	1.36618	0.00672997	0.0540468	0.923973	2.74013	5.7445	0.0236067	100		0.961945			CH12020_1	CH12020_1_gl3	Andesite	318652	23513.4	20.8539	53.9357	120.929	333.754	39.8668	286.52	14.5621	837.879	39.8005	70.6767	8.62631	1.30197	6.28581	3.39047	7.03901	16.8865
83070_glass6	Phase 2	75.6148	0.0675712	13.3704	1.36061	0.029298	0.0660238	0.861713	2.51943	6.07573	0.034353	100		0.95372			CH12020_1	CH12020_1_gl6	Andesite	299773	23513.4	19.912	54.589	110.139	333.454	39.2382	276.454	13.6101	836.509	39.6793	67.7632	7.24454	1.2372	6.6628	3.40973	6.56838	16.4376
83070_glass7	Phase 2	75.7649	0.0755266	13.4997	1.34205	0.0204378	0.0468929	0.825709	2.56396	5.83764	0.0232389	100		0.966238	0.9651		CH12020_1	CH12020_1_gl7	Andesite	292669	23513.4	20.7213	52.0344	112.672	335.403	39.4688	284.064	13.816	819.747	40.5025	70.8792	7.51317	1.0318	6.18872	2.93545	6.20731	14.5835
83070_carbglass5	Phase 2	75.8743	0.0748368	13.4001	1.331	0.0250838	0.0412535	0.845594	2.62198	5.75445	0.0314066	100		0.969937			CH12020_1	CH12020_1_gl8	Andesite	284179	23513.4	20.8197	58.2971	116.818	326.69	33.3018	272.063	13.8221	842.213	41.998	75.7593	5.25533	1.44597	3.82576	3.03045	6.34363	16.3124
83070_carbglass6	Phase 2	75.322	0.0679218	13.5269	1.36948	0.0332249	0.0609824	0.998114	2.48619	6.1035	0.0316478	100		0.957369			CH12020_1	CH12020_1_gl9	Andesite	295315	23513.4	20.6637	55.3942	105.725	341.021	39.7794	281.45	13.0971	837.651	41.022	70.1366	6.39021	1.30961	6.68108	3.72052	6.66801	15.2209
83070_carbglass7	Phase 2	75.8043	0.0774901	13.5177	1.28415	0.0301639	0.0438937	0.910639	2.62561	5.67581	0.0302679	100		0.966949			CH12020_1	CH12020_1_gl10	Andesite	290146	23513.4	21.269	56.0489	110.729	321.954	40.3484	289.12	14.2765	841.144	40.3668	70.5783	7.18851	1.16439	7.03	3.51228	6.93952	17.718
83070_carbglass9	Phase 2	75.8653	0.0424543	13.6717	0.974987	0.0473568	0.0288939	1.00033	2.64572	5.69054	0.0326491	100		0.971218			CH12020_1	CH12020_1_gl11	Andesite	293686	23513.4	19.6426	54.9074	111.212	322.962	38.8782	280.792	13.8696	815.055	38.555	69.5181	7.47528	1.24947	6.17886	2.91658	6.30685	17.16
83070_carbglass10	Phase 2	75.7615	0.072852	13.5646	1.28191	0.0306425	0.0559073	0.956309	2.53612	5.67951	0.0606762	100		0.95821			CH12020_1	CH12020_1_gl12	Andesite	302507	23513.4	19.6136	55.3986	112.008	334.699	38.2346	286.258	14.9005	851.162	40.381	71.2844	7.29862	1.17175	6.9434	2.94678	7.13269	17.813
CH12021_glass1	Phase 2	75.2907	0.0755544	13.7699	1.40266	0.022445	0.0648061	0.928255	2.28149	6.1354	0.028873	100		0.955838			CH12020_1	CH12020_1_gl13	Andesite	300281	23513.4	19.7178	56.0944	115.803	334.617	37.1062	282.187	14.1622	818.628	37.6388	70.9538	6.63757	1.13476	5.9165	2.5051	6.77065	15.577
CH12021_glass2	Phase 2	75.4999	0.0764383	13.5869	1.3967	0.0424541	0.0465322	0.929703	2.78921	5.62099	0.0111886	100		0.967758			CH12020_1	CH12020_1_gl14	Andesite	255157	23513.4	18.2365	48.5983	107.352	336.837	37.1899	276.8	12.1163	768.394	38.3244	65.0189	7.20835	1.05788	6.48331	2.99675	6.54124	17.5744
CH12021_glass3	Phase 2	75.4808	0.073461	13.6598	1.36706	0.0414262	0.0615654	0.965011	2.60108	5.72746	0.0223305	100		0.956906			CH12020_1	CH12020_1_gl15	Andesite	356182	23513.4	22.6168	50.8418	144.403	371.846	47.3232	312.336	14.4439	897.859	48.081	81.3804	9.94596	0.719503	7.20244	3.1983	7.83094	21.472
CH12021_glass5	Phase 2	75.7902	0.0760386	13.5361	1.36501	0.0281858	0.0222962	0.925925	2.69248	5.54798	0.0157756	100		0.983928			83069	83069_gl3	Andesite	314229	22798.7	21.6435	55.7881	138.382	342.702	44.1594	306.864	15.6661	941.755	45.1712	80.6868	7.88764	1.17584	6.57349	3.56265	7.30758	30.8815
CH19C007_glass11	Andesite	68.7323	0.441361	16.1087	3.5352	0.0541805	0.675355	2.91094	3.42283	3.86574	0.253425	100		0.839604	0.766941	0.849511	83069	83069_gl4	Andesite	321811	22798.7	20.9252	53.9732	132.593	348.014	41.9503	301.875	15.2285	934.401	43.0622	81.409	7.78112	1.27638	7.14482	3.7045	7.00109	24.7392
CH19C007_glass14	Andesite	68.0139	0.453914	16.3384	3.45432	0.0557528	0.653969	3.2886	3.63131	3.82122	0.288705	100		0.840817			83069	83069_gl5	Andesite	380044	22798.7	22.5044	62.4576	164.453	341.817	37.0256	317.793	16.9279	868.644	45.2177	80.8952	7.64038	1.39046	7.18068	3.22424	7.84547	48.4429
CH19C007_glass15	Andesite	68.3986	0.469109	15.4936	3.95256	0.0759161	0.997171	2.83005	3.38649	4.09853	0.29801	100		0.79854			83069	83069_gl6	Andesite	371536	22798.7	22.6092	58.7646	167.284	399.527	46.2285	316.494	16.3346	983.05	45.6142	80.6226	7.57204	1.26159	6.86745	3.59032	7.07365	33.8742
CH19C007_glass16	Andesite	66.7536	0.444377	17.6112	3.16345	0.070822	0.65367	4.21452	3.26252	3.48952	0.336302	100		0.828753	0.808595		83069	83069_gl7	Andesite	332583	22798.7	20.6263	50.104	149.435	324.294	43.5867	315.686	14.0464	898.69	41.9992	77.2709	2.85873	0.958492	6.51175	3.07075	7.23784	19.2308
CH19C007_glass19	Andesite	68.8443	0.436103	16.687	3.54982	0.113364	0.628842	3.46243	2.71252	3.40554	0.160086	100		0.849511			83069	83069_gl11	Andesite	333973	22798.7	21.7404	61.901	160.956	344.831	46.2126	328.912	15.988	946.666	45.9144	85.6558	8.72118	1.331	6.21369	3.57489	7.04476	42.6543
CH19C007_glass21	Andesite	68.3291	0.459663	16.2219	3.35502	0.08799	0.689341	3.37391	3.46652	3.69281	0.323725	100		0.829555			83069	83069_gl12	Andesite	332205	22798.7	17.6515	59.7152	149.156	333.26	40.5113	296.676	15.6646	962.195	42.7573	77.7214	6.85432	1.22534	5.43122	2.49451	5.71312	18.2613
CH19C007_glass28	Andesite	65.9194	0.453285	17.2688	3.75186	0.0268012	1.11996	4.18647	3.63775	3.39015	0.245475	100		0.770114			83069	83069_gl14	Andesite	308601	22798.7	20.442	54.9558	131.603	338.346	44.5345	305.844	14.3994	921.763	41.4875	80.7716	8.37457	1.28715	6.8226	3.27555	6.96412	17.9846
CH12020-2_glass2	Andesite	68.1835	0.549491	15.9813	3.82803	0.0437638	0.991806	3.31337	3.08457	3.60578	0.418407	100		0.794224			83069	83069_gl15	Andesite	260450	22798.7	17.7902	44.8574	109.281	307.084	35.9815	257.511	12.7737	740.927	35.3114	65.9487	7.53401	1.14337	6.41288	2.98895	6.43098	16.5449
CH12020-2_glass3	Andesite	68.5145	0.493421	16.2481	3.51528	0.0605992	0.949283	3.24522	3.17609	3.46236	0.33519	100		0.787374			CH12020_2	CH12020_2_gl1	Andesite	295691	23656.4	21.2482	55.4689	109.841	324.018	40.1787	280.356	13.2026	808.051	40.2434	70.9749	7.73259	1.11275	6.58479	2.85695	6.61361	15.8878
CH12020-2_glass4	Andesite	67.9779	0.564213	16.0025	3.83919	0.0811082	0.894171	3.21128	3.33857	3.69532	0.395742	100		0.811092			CH12020_2	CH12020_2_gl4	Andesite	378933	23656.4	23.5025	62.8124	136.828	321.784	34.9492	280.377	14.0689	854.152	37.1684	71.7946	6.41363	1.16599	6.66741	2.48734	6.71472	21.4873
CH12020-2_glass7	Andesite	68.1469	0.569749	16.2133	3.78472	0.0466785	0.866424	3.25329	3.12809	3.60876	0.382095	100		0.813718			CH12020_2	CH12020_2_gl5	Andesite	313435	23656.4	21.7349	60.7421	126.454	332.165	105.751	283.841	13.399	787.466	51.2675	80.1356	8.55844	1.60029	10.6304	11.1387	7.86413	16.8616
CH12020-2_glass8	Andesite	68.49	0.549191	16.1878	3.72817	0.0668616	0.88434	3.17488	2.97944	3.54146	0.397911	100		0.808274			CH12020_2	CH12020_2_gl7	Andesite	323221	23656.4	21.9291	58.5838	112.475	323.249	38.6024	278.682	14.5918	831.149	39.7726	71.0999	7.10358	1.292	5.8982	3.03555	6.71679	17.1404
CH12020-2_glass9	Andesite	67.8571	0.560835	16.2094	4.01366	0.0570128	0.925466	3.26017	2.99254	3.70103	0.422793	100		0.812626			CH12020_2	CH12020_2_gl8	Andesite	307364	23656.4	21.2464	59.1097	110.259	317.497	40.1995	283.985	14.6513	845.439	43.5539	74.4715	7.78047	1.22022	6.28581	3.20438	6.57342	17.1489
CH12020-2_glass10	Andesite	68.0452	0.560197	16.0675	4.05688	0.0667597	0.950725	3.22129	3.1026	3.53544	0.393454	100		0.810144			CH12020_2	CH12020_2_gl9	Andesite	235168	23656.4	19.9333	54.0814	101.145	310.771	55.3325	271.758	13.8192	854.483	45.4237	72.5303	8.00964	1.74733	10.7134	4.51284	6.27277	15.0193
CH12020-2_glass11	Andesite	68.0848	0.56176	16.1292	3.9679	0.0655386	0.94979	3.31792	3.11298	3.40895	0.401242	100		0.806862			CH12020_2	CH12020_2_gl11	Andesite	297564	23656.4	21.1233	57.6995	125.891	321.298	43.2812	298.784	15.781	909.233	42.1959	79.6794	7.68894	1.43423	7.4643	3.39268	7.23442	20.2617
CH12020-2_glass12	Andesite	68.0974	0.551305	16.101	4.08657	0.0728178	0.945692	3.31003	2.90362	3.53245	0.399088	100		0.812074			CH12020_2	CH12020_2_gl12	Andesite	299028	23656.4	21.6607	53.9425	118.034	320.681	43.4879	295.473	14.364	886.248	42.9423	79.676	8.59889	1.45499	6.81299	3.78433	6.75992	18.37
CH12020-2_glass13	Andesite	68.119	0.56102	16.067	3.88315	0.0577843	0.968227	3.35065	3.12652	3.46643	0.400206	100		0.800422			CH12020_2	CH12020_2_gl14	Andesite	316544	23656.4	21.8924	53.3569	124.122	328.643	45.2499	312.163	14.3334	902.783	43.7225	78.6726	8.11374	1.37544	6.45541	3.41555	7.1022	16.6128
CH12020-2_glass14	Andesite	67.9853	0.55258	16.0897	3.90835	0.0616747	0.900617	3.39595	3.26512	3.41339	0.427258	100		0.812721			CH12020_2	CH12020_2_gl15	Andesite	350733	23656.4	20.1661	67.8533	135.94	319.868	34.1027	251.205	16.6617	946.336	37.2844	83.5039	7.423	1.33366	5.77339	2.95538	6.26288	25.0468
CH12020-2_glass15	Andesite	68.3254	0.560041	16.1271	3.70046	0.0651016	0.876576	3.28596	3.07052	3.5953	0.393531	100		0.808484			CH12020_2	CH12020_2_gl16	Andesite	352634	23656.4	20.6203	68.2222	130.197	313.186	35.5149	256.897	14.7477	890.673	38.3235	78.8724	6.72333	1.31012	5.77342	3.03869	6.04517	20.6264
CH12020-2_glass18	Andesite	68.1444	0.552593	16.071	3.7239	0.0691001	0.932175	3.31347	3.22895	3.57372	0.390629	100		0.799794			CH12020_2	CH12020_2_gl17	Andesite	364162	23656.4	21.7491	62.2916	137.817	323.933	37.4776	282.392	15.3348	899.773	40.3807	80.4316	8.51161	1.17682	6.55336	3.15709	6.57098	24.0794
CH12020-2_glass19	Andesite	67.9524	0.543655	16.3403	3.54852	0.0666747	0.9145	3.35854	3.22362	3.63791	0.413865	100		0.795094			CH12020_2	CH12020_2_gl18	Andesite	343588	23656.4	22.611	54.5096	125.44	328.347	41.386	308.129	14.972	962.436	44.2875	83.6406	8.23046	1.38873	7.42351	3.73991	7.72545	21.3549
CH12020-2_glass20	Andesite	68.3084	0.536692	16.1321	3.62889	0.0618858	0.906543	3.24346	3.18241	3.64049	0.359084	100		0.80012			CH12020_2	CH12020_2_gl19	Andesite	364619	23656.4	22.0565	62.9745	141.616	320.654	37.2402	270.432	17.3111	971.769	42.1542	86.0907	7.42937	1.38854	6.41867	3.40834	6.70724	23.7878
CH12020_carbglass1	Andesite	68.0061	0.559205	15.9631	4.11334	0.0526507	0.895167	3.24899	3.1394	3.63363	0.388403	100		0.821271			CH12020_2	CH12020_2_gl20	Andesite	341295	23656.4	21.3734	66.4828	133.757	315.318	35.216	253.101	15.8199	916.327	38.5784	79.4584	7.86569	1.36854	5.57548	2.85425	6.01258	22.7653
CH12020_carbglass2	Andesite	67.2783	0.580973	15.9785	4.22568	0.0610011	1.00735	3.54611	3.37908	3.53671	0.406221	100		0.807501			CH12020_2	CH12020_2_gl21	Andesite	305751	23656.4	21.312	54.1513	119.928	310.862	41.2374	282.488	14.1208	921.258	40.9902	75.6364	8.30753	1.23796	7.19473	3.5121	7.98009	19.7069
CH12020_carbglass3	Andesite	68.2199	0.548768	16.0935	3.81566	0.0615294	0.911177	3.29521	3.05086	3.61639	0.386979	100		0.807233			CH12020_2	CH12020_2_gl23	Andesite	368113	23656.4	22.0243	61.2429	145.539	330.77	38.0327	276.076	16.398	933.214	41.7944	80.5639	8.0366	1.34856	6.08598	3.02108	6.64629	24.8721
CH12020_carbglass4	Andesite	68.0625	0.248649	16.0502	3.86837	0.0556849	0.966075	3.63571	3.24163	3.44598	0.425211	100		0.800169			CH12020_2	CH12020_2_gl24	Andesite	334512	23656.4	21.2429	66.1576	134.046	316.767	35.588	252.63	15.7998	924.649	38.1596	86.3856	7.40561	1.27594	6.55223	3.19344	6.12642	23.3945
CH12020_carbglass6	Andesite	69.1219	0.372955	15.9798	3.05347	0.0485635	0.927891	3.28116	3.26391	3.66861	0.281753	100		0.766941			CH12020_2	CH12020_2_gl25	Andesite	361658	23656.4	23.2386	52.4507	140.141	343.975	45.4639	331.803	15.5644	973.538	46.1819	81.8529	9.6286	1.41278	6.99288	4.58983	8.25093	19.8628
CH12020_carbglass8	Andesite	68.2148	0.554894	15.966	3.94092	0.0584317	0.901117	3.27093	3.05114	3.63483	0.406943	100		0.813897			CH12020_2	CH12020_2_gl27	Andesite	230413	23656.4	16.5229	43.3522	86.9564	340.665	39.5179	249.293	11.8708	752.209	35.3627	60.732	5.59353	1.00094	4.1521	3.52259	5.69789	17.6326
CH12020_carbglass9	Andesite	68.4462	0.543646	16.1328	3.57081	0.0736058	0.879745	3.43055	2.95792	3.52302	0.441635	100		0.802329
																	Error (1SD) - Averages
Standards																	Sample	Spot	Rocktype	Sc	V	Rb	Sr	Y	Zr	Nb	Ba	La	Ce	Sm	Eu	Dy	Yb	Hf	Pb
Comment	K2O	CaO	SiO2	Al2O3	Na2O	MgO	P2O5	FeO	MnO	TiO2	Cl	SO3	Total				84014	all	Phase 2	1.35436	0.163377	8.65021	3.70455	5.15249	10.7982	1.30496	46.6894	1.67799	3.55059	0.711637	0.081974	0.537855	0.318513	0.430207	3.8527
RLS132.	4.707	0.0928	75.5516	11.6544	4.999	0.0746	-0.0663	2.1334	0.1574	0.221	0.1742	0.0078	99.6677				83070	all	Phase 2	0.845028	0.297453	10.1234	2.15173	2.08472	9.11696	1.93339	24.1103	1.76382	3.66701	0.265963	0.0456918	0.190745	0.171314	0.351522	4.21998
RLS132.	4.8612	0.1338	75.842	11.6256	4.722	0.0494	0.0386	2.1079	0.1574	0.1925	0.1819	0.0152	99.8866				CH12021	all	Phase 2	1.1636	0.158095	8.0203	3.23009	4.36439	9.36769	1.35086	43.924	1.60962	3.83563	0.486842	0.0515205	0.508756	0.302804	0.353925	4.02782
RLS132.	4.6846	0.1516	75.787	11.4757	4.8068	0.0448	-0.0297	1.9747	0.1066	0.1838	0.1893	0.0123	99.3448				CH19C005	all	Phase 2	1.40342	0.215218	15.1727	5.31152	5.07275	11.0285	1.39949	51.3942	1.95025	3.61482	0.566565	0.0954047	0.834363	0.404262	0.472946	3.99799
RLS132.	4.7755	0.1419	75.439	11.7344	4.904	0.0688	-0.0812	2.0993	0.1361	0.1997	0.1834	0.0094	99.569				CH19C003	all	Phase 1	0.770814	0.284819	4.81465	6.43107	2.27719	14.4456	1.60947	37.7956	1.38916	2.72469	0.374526	0.0896554	0.290508	0.178851	0.424002	3.2208
RLS132.	4.7839	0.1051	75.3609	11.4543	4.664	0.0474	-0.0495	1.9853	0.1607	0.1812	0.1799	0.0268	98.8595				CH19C009	all	Phase 1	0.813034	0.321396	4.52415	5.61469	2.40691	18.1922	1.65164	31.5713	2.06921	2.74956	0.436469	0.0901426	0.309318	0.16403	0.493167	2.84631
RLS132.	4.7577	0.1232	75.9432	11.7886	4.6191	0.0443	0.0269	1.8898	0.137	0.1726	0.1818	0.0205	99.6637				CH19C007	all	Andesite	1.89599	3.54053	9.48651	8.06987	4.50385	32.6554	1.79815	39.7457	2.31043	4.5628	0.615287	0.129152	0.511853	0.319745	0.862813	3.09212
RLS132.	4.7711	0.1065	75.5598	11.7874	4.9085	0.0673	-0.0628	2.173	0.1502	0.2079	0.1793	0.0249	99.8327				CH12020_1	all	Andesite	1.4155	3.00249	4.17179	8.38366	3.67199	24.288	1.20831	22.404	1.16358	2.16914	0.542415	0.0972089	0.548791	0.255011	0.628102	1.91976
RLS132.	4.7502	0.1273	76.3342	11.8049	3.9445	0.0926	-0.0668	1.9531	0.1486	0.1934	0.1775	0.0079	99.4273				83069	all	Andesite	1.55861	3.20329	6.71497	8.23847	4.0496	27.1118	1.35947	29.9866	1.3674	2.19868	0.834655	0.137314	0.576393	0.30051	0.658384	3.53344
RLS132.	4.7181	0.1206	75.605	11.7057	5.2898	0.0599	-0.005	2.0009	0.2046	0.1867	0.1902	0.0199	100.053				CH12020_2	all	Andesite	1.44165	3.21767	4.60223	7.8633	4.91182	24.6549	1.28553	27.7483	1.62146	2.56666	0.430736	0.0983624	0.454082	0.385807	0.536954	2.24252
RLS132.	4.6621	0.1088	75.3272	11.8647	4.6843	0.0629	0.008	2.2328	0.1304	0.1881	0.188	0.0376	99.4526
Avg	4.74714	0.12116	75.675	11.6896	4.7542	0.0612	-0.02878	2.05502	0.1489	0.19269	0.18255	0.01823	99.5757				Error (1SD) Raw
2SD	0.114422	0.0364453	0.616667	0.276518	0.694017	0.0309072	0.0862741	0.219446	0.0508811	0.0279212	0.0105051	0.019309					Sample	Spot	Rocktype	Si	Ca	Sc	V	Rb	Sr	Y	Zr	Nb	Ba	La	Ce	Sm	Eu	Dy	Yb	Hf	Pb
																	84014	84014_gl1	Rhyolite	9298.67	102.499	1.15574	0.0693259	5.24194	3.75517	4.63507	9.91191	1.27466	31.6069	1.26759	3.174	0.492502	0.0377608	0.317881	0.216146	0.315466	3.8985
																	84014	84014_gl2	Rhyolite	13871.6	102.499	1.35561	0.167905	5.37754	3.86944	4.65421	10.3555	1.11952	44.4054	1.42662	2.54343	0.548148	0.0814444	0.371513	0.314495	0.517269	3.32839
VG568.	5.4367	0.4503	77.0933	12.4173	3.8018	0.0164	-0.001	1.2023	0.0363	0.0897	0.1056	-0.0041	100.621				84014	84014_gl3	Rhyolite	27279.2	102.499	1.89105	0.132355	12.2931	8.37784	5.16648	11.8756	1.73363	79.2862	3.56361	6.15132	0.674107	0.227807	0.819527	0.437282	0.555407	4.14492
VG568.	5.3917	0.4634	77.1695	12.4552	3.7002	0.0332	-0.0637	0.9079	0.0115	0.0821	0.1039	0.0054	100.237				84014	84014_gl4	Rhyolite	8067.95	102.499	1.57974	No_Data	13.5831	4.19881	5.27505	11.2312	1.39242	47.6795	2.06759	4.75157	1.11141	0.184291	0.581032	0.410351	0.410701	3.18248
VG568.	5.3058	0.4596	76.8748	12.4425	3.4711	0.014	0.0587	1.0655	0.0429	0.0657	0.1098	0.0043	99.8899				84014	84014_gl5	Rhyolite	20228.6	102.499	1.33387	0.212949	8.55026	4.28785	4.96087	11.4379	1.33361	41.426	1.38702	2.76539	2.02504	0.0776892	0.649525	0.557045	0.363535	3.76571
																	84014	84014_gl6	Rhyolite	6354.23	102.499	1.09766	0.0308235	4.15736	2.91893	4.76627	9.88577	1.12301	40.8027	2.18069	4.60826	0.337003	0.0728271	0.473402	0.172533	0.353661	3.12676
Avg	5.37807	0.457767	77.0459	12.4383	3.6577	0.0212	-0.002	1.05857	0.0302333	0.0791667	0.106433	0.00186667	100.249				84014	84014_gl7	Rhyolite	5945.26	102.499	1.24166	0.154651	9.91203	3.4906	5.34726	11.4053	1.33374	22.3089	1.71417	2.1789	0.683639	0.104365	0.397128	0.379697	0.344944	3.30683
2SD	0.133013	0.0134794	0.305938	0.038581	0.338794	0.0209227	0.122412	0.294645	0.0331115	0.0245319	0.00607399	0.0103929					84014	84014_gl8	Rhyolite	7069.82	102.499	1.24716	0.0765794	4.10709	2.3115	4.71102	10.6793	1.14949	38.5431	1.43449	3.99584	0.311518	0.0539211	0.455263	0.363226	0.345717	2.68681
																	84014	84014_gl9	Rhyolite	8351.4	102.499	1.27404	0.427037	6.83758	2.36215	5.43982	10.8063	1.42488	32.6861	1.52175	3.36924	0.466149	0.0820678	0.699843	0.303898	0.592112	3.43178
																	84014	84014_gl10	Rhyolite	7935.81	102.499	1.26601	0.0779193	9.02408	2.12465	4.64103	9.92074	1.28758	30.9876	1.22782	3.32259	0.460332	0.0323576	0.308331	0.243869	0.566989	3.99553
																	84014	84014_gl11	Rhyolite	11701.5	102.499	1.17269	0.161139	4.64982	2.56504	5.25874	9.99731	1.31593	67.5925	1.05741	3.03584	0.476417	0.0628313	0.40651	0.225546	0.423702	4.10871
																	84014	84014_gl12	Rhyolite	16076.3	102.499	1.29276	0.149552	7.91323	2.1874	4.57839	10.0979	1.20106	37.2584	0.917001	3.18502	0.994718	0.0408514	0.437985	0.302221	0.290983	4.83094
																	84014	84014_gl13	Rhyolite	13535.6	102.499	1.29895	0.0788118	6.44778	2.1659	4.46435	9.70759	1.23366	36.4821	1.35734	3.61989	0.329321	0.0496373	1.1473	0.199248	0.267238	4.17916
																	84014	84014_gl13	Rhyolite	8258.17	102.499	1.24674	0.0764147	6.1574	2.28854	4.52042	9.71362	1.14165	29.3252	0.975868	2.47408	0.484938	0.0263201	0.261028	0.215914	0.391271	3.40251
																	84014	84014_gl14	Rhyolite	25254.6	102.499	1.66981	0.353138	18.5863	6.89615	8.00493	12.3237	1.46662	104.187	2.39913	4.3976	1.14043	0.0745247	0.629925	0.460384	0.538015	5.37799
																	84014	84014_gl15	Rhyolite	13637.1	102.499	1.54634	0.282056	15.5647	5.47276	6.01589	13.4213	1.34789	62.4529	2.34975	3.23649	0.850524	0.10289	0.649488	0.294358	0.606297	4.87616
																	83070	83070_gl2	Rhyolite	5896.89	102.499	0.806227	0.4074	6.55057	1.75348	1.89011	9.33132	1.92149	13.502	1.14385	3.01418	0.215785	0.0256864	0.172709	0.0957881	0.286914	4.09721
																	83070	83070_gl3	Rhyolite	19266.8	102.499	1.20096	0.269645	23.5808	1.57124	2.50815	9.44649	2.48259	67.2974	2.59225	8.95896	0.24128	0.0439936	0.178888	0.272994	0.355702	4.92397
																	83070	83070_gl4	Rhyolite	13308.9	102.499	0.971615	0.372448	12.0429	1.26753	2.02776	9.38024	2.11097	22.9729	2.07809	4.10377	0.344862	0.045456	0.177754	0.183958	0.49861	4.54336
																	83070	83070_gl5	Rhyolite	9211.18	102.499	0.902987	0.264636	11.3041	1.73486	2.18646	9.26256	2.00429	20.1696	1.51688	2.79702	0.355056	0.0608586	0.165304	0.197436	0.441098	4.77023
																	83070	83070_gl6	Rhyolite	13256.1	102.499	0.841473	0.220656	8.55323	2.28793	1.89709	8.8381	2.36655	30.3548	1.84138	4.90684	0.185813	0.0383279	0.167507	0.113311	0.31709	5.22269
																	83070	83070_gl7	Rhyolite	9360.51	102.499	0.769954	0.28624	8.6143	2.29539	1.79473	8.4125	1.75761	23.8433	1.56974	3.72757	0.240311	0.0283797	0.163618	0.173775	0.334825	3.89257
																	83070	83070_gl10	Rhyolite	7160.26	102.499	0.706977	0.229675	8.91605	2.04904	2.29474	9.73514	1.79957	15.7529	1.29681	3.06452	0.373296	0.0625012	0.145195	0.093472	0.336209	3.20313
																	83070	83070_gl11	Rhyolite	11029.9	102.499	0.799032	0.247035	6.68402	1.78871	2.02752	8.99171	1.86261	18.1022	1.5944	1.91213	0.156036	0.0262903	0.177392	0.104908	0.318614	4.14675
																	83070	83070_gl12	Rhyolite	12988.3	102.499	0.847684	0.347552	13.3117	1.6056	2.09228	8.77267	1.95886	16.5965	1.62401	2.39276	0.155505	0.0527405	0.195715	0.175407	0.274651	4.30865
																	83070	83070_gl14	Rhyolite	8354.54	102.499	0.803777	0.267522	7.38026	3.19704	2.39969	10.3923	1.80439	19.0967	3.12236	3.5219	0.241581	0.0360817	0.229685	0.199955	0.476657	4.00369
																	83070	83070_gl15	Rhyolite	10762.3	102.499	0.781822	0.210884	8.03368	2.20367	2.1838	9.53354	1.78396	15.5357	1.552	2.35518	0.437762	0.0673488	0.269573	0.298579	0.35141	3.77086
																	83070	83070_gl16	Rhyolite	7428.95	102.499	0.707829	0.445748	6.50907	4.06631	1.71433	7.30692	1.34779	26.0992	1.23407	3.24923	0.24427	0.0606364	0.245598	0.146189	0.226485	3.75669
																	CH12021	CH12021_gl1	Rhyolite	10791.7	104.727	1.1602	0.106535	6.14097	4.98803	4.51927	9.5976	1.18408	51.012	1.64344	1.82683	0.44834	0.0261177	0.727726	0.310065	0.417696	8.81995
																	CH12021	CH12021_gl2	Rhyolite	14838.3	104.727	1.36307	0.0995271	8.24711	1.6167	4.25144	8.93881	1.39211	39.7597	1.24584	3.54248	0.541051	0.0533927	0.438728	0.253596	0.327921	4.60464
																	CH12021	CH12021_gl3	Rhyolite	14930.2	104.727	1.12978	0.238003	13.6487	3.775	4.62239	9.51911	1.29513	73.198	1.34764	7.37023	0.430559	0.0514152	0.387993	0.319482	0.260165	3.19757
																	CH12021	CH12021_gl4	Rhyolite	14713	104.727	1.21742	0.214835	18.6064	5.23295	4.91816	10.6805	1.37164	44.1481	1.50296	3.26213	0.390003	0.0642885	0.519243	0.321948	0.413442	5.22714
																	CH12021	CH12021_gl5	Rhyolite	14803	104.727	0.95377	0.142718	6.80838	2.50129	4.01997	9.09775	1.1512	79.9411	3.56566	3.93356	0.300544	0.0407653	0.713061	0.542479	0.402123	2.5333
																	CH12021	CH12021_gl6	Rhyolite	29182.4	104.727	1.39644	0.43866	12.3576	4.86657	4.89149	11.4381	1.18849	52.5303	2.90227	3.27706	1.11086	0.0373498	1.01885	0.48708	0.562144	2.75762
																	CH12021	CH12021_gl7	Rhyolite	18547.8	104.727	1.21844	0.112121	7.70175	5.01112	3.44518	7.27054	1.28761	25.0898	1.21269	4.39199	0.360345	0.0334797	0.451074	0.242066	0.30851	3.73895
																	CH12021	CH12021_gl8	Rhyolite	6082.72	104.727	1.05367	0.0639826	3.40598	2.6925	4.1127	8.75237	1.30178	28.4619	1.69111	1.89633	0.450539	0.0230403	0.637154	0.236716	0.3044	3.82172
																	CH12021	CH12021_gl9	Rhyolite	8529.44	104.727	1.13073	0.0484542	3.62917	1.64455	4.37514	9.32814	1.32452	23.2402	0.87734	2.26915	0.435468	0.0324276	0.255814	0.112551	0.332623	3.49021
																	CH12021	CH12021_gl10	Rhyolite	11327.6	104.727	1.10585	0.286948	5.7446	2.21843	5.21658	10.4508	1.69046	52.3941	1.8424	5.5619	0.602681	0.0578217	0.487164	0.571197	0.382076	3.08707
																	CH12021	CH12021_gl11	Rhyolite	9685.99	104.727	1.12438	0.135026	4.98193	2.88204	4.05142	8.69967	1.28772	35.6958	1.1865	4.02499	0.252475	0.151167	0.275661	0.171752	0.314307	3.49633
																	CH12021	CH12021_gl12	Rhyolite	8640.38	104.727	1.10608	0.106588	4.68826	2.0612	4.12806	9.20075	1.7571	39.0161	1.11931	5.56737	0.539405	0.0611856	0.246387	0.229306	0.300524	3.98812
																	CH12021	CH12021_gl13	Rhyolite	6089	104.727	1.16698	0.0618392	8.30303	2.50075	4.18534	8.80586	1.32931	26.5242	0.787947	2.93918	0.466671	0.0373153	0.454975	0.138216	0.275098	3.59905
																	CH19C005	CH19C005_gl1	Rhyolite	26816.7	111.412	1.33859	0.235323	22.956	7.58167	4.95299	11.4992	1.41602	56.7539	2.25964	2.17589	0.784359	0.185566	0.681476	0.41274	0.56786	3.50758
																	CH19C005	CH19C005_gl2	Rhyolite	34069.4	111.412	1.41235	0.126511	17.4415	5.03064	5.42431	10.3075	1.74475	42.5315	1.63635	3.62327	0.448302	0.0544118	0.252325	0.194627	0.368837	3.73412
																	CH19C005	CH19C005_gl3	Rhyolite	30009.1	111.412	1.33342	0.169303	7.22476	5.05874	4.69776	9.42208	1.51463	57.4723	2.21844	4.22138	0.685224	0.0983705	1.06816	0.433961	0.440651	5.14205
																	CH19C005	CH19C005_gl4	Rhyolite	38591.7	111.412	2.20835	0.101753	34.8808	8.62553	5.56369	11.5397	1.26414	100.441	2.70691	3.9137	0.747523	0.123135	0.792478	0.919454	0.773587	4.57769
																	CH19C005	CH19C005_gl5	Rhyolite	8386.88	111.412	1.10637	0.0881275	19.5082	4.11437	5.14308	10.9054	1.34589	30.9716	1.59768	2.78868	0.398536	0.168111	0.344969	0.426881	0.382057	2.99119
																	CH19C005	CH19C005_gl6	Rhyolite	18780	111.412	1.39235	0.182794	6.74811	2.74261	4.99086	10.2367	1.24149	44.4668	1.48364	3.72402	0.369926	0.101619	0.446355	0.14131	0.330279	2.79949
																	CH19C005	CH19C005_gl7	Rhyolite	7293.93	111.412	1.78379	0.150692	7.99598	4.3195	4.9571	10.6232	1.43228	41.6597	1.13681	3.61135	0.636581	0.059555	0.42682	0.410444	0.477535	4.73827
																	CH19C005	CH19C005_gl8	Rhyolite	30957.3	111.412	1.8934	0.356396	10.1573	4.56255	4.69569	10.2086	1.27176	58.8367	3.28421	5.39449	0.321323	0.0302717	1.67474	0.283021	0.299414	2.54704
																	CH19C005	CH19C005_gl9	Rhyolite	12003.6	111.412	1.18045	0.150784	12.2325	8.77629	4.71219	10.7271	1.26471	48.3085	1.98454	4.35839	0.348425	0.052413	0.41293	0.48577	0.486537	4.02098
																	CH19C005	CH19C005_gl10	Rhyolite	7284.3	111.412	1.24559	0.154359	8.21877	3.81157	5.1939	10.8539	1.30651	30.1077	1.25802	2.11757	0.722762	0.063544	0.596098	0.285558	0.511007	3.36945
																	CH19C005	CH19C005_gl11	Rhyolite	24581.8	111.412	2.10841	0.760892	17.9285	7.39129	5.54215	18.2178	1.40675	67.4366	1.80132	5.18746	0.416553	0.122	2.30743	0.399241	0.51405	5.53114
																	CH19C005	CH19C005_gl12	Rhyolite	47282.6	111.412	1.19616	0.533466	46.8329	8.10849	6.3972	11.6795	1.65755	56.0785	3.22837	5.39998	0.543069	0.152149	2.14272	0.665288	0.697361	5.31908
																	CH19C005	CH19C005_gl13	Rhyolite	14674.5	111.412	1.1234	0.156456	8.09972	2.45481	4.52657	9.23367	1.68561	74.8312	1.70761	4.47289	0.574904	0.0242186	0.489232	0.23976	0.357393	3.95736
																	CH19C005	CH19C005_gl14	Rhyolite	8139.24	111.412	1.25523	0.0813258	7.85223	1.97459	4.63828	9.88966	1.49327	26.851	1.75676	2.15052	0.585974	0.0317522	0.338265	0.392608	0.537438	4.57097
																	CH19C005	CH19C005_gl15	Rhyolite	20259.9	111.412	1.11558	0.074436	9.36902	4.73234	5.16835	10.7776	1.49228	42.7946	2.01315	3.10953	0.739838	0.0368715	0.840578	0.243064	0.416506	5.69486
																	CH19C005	CH19C005_gl16	Rhyolite	6211.23	111.412	1.12205	0.195026	8.82381	2.02523	3.96294	10.7603	1.07541	46.853	1.52471	2.89031	0.894334	0.201136	0.248386	0.30254	0.400894	2.37105
																	CH19C005	CH19C005_gl17	Rhyolite	15962.7	111.412	1.04265	0.141054	11.6664	8.98568	5.66966	10.603	1.17824	47.3066	1.55615	2.31246	0.413972	0.116754	1.12121	0.63618	0.478678	3.09351
																	CH19C003	CH19C003_gl1	Rhyolite	21008.2	160.397	0.733251	0.177989	3.98779	4.49175	1.98743	12.9787	1.6595	28.8024	1.12235	2.52993	0.376493	0.0830589	0.199659	0.341231	0.464982	4.87762
																	CH19C003	CH19C003_gl2	Rhyolite	21799.1	160.397	0.865759	0.261304	4.7134	15.3668	2.39957	14.4937	1.79382	44.4477	2.22603	4.57738	0.250246	0.0926073	0.425564	0.115582	0.384763	3.90988
																	CH19C003	CH19C003_gl3	Rhyolite	16792.6	160.397	0.770354	0.234425	4.28458	4.95669	2.20199	14.2723	1.76927	34.9312	1.32973	2.6261	0.432312	0.0889051	0.189358	0.182349	0.428994	2.72691
																	CH19C003	CH19C003_gl4	Rhyolite	8923.82	160.397	0.73519	0.28859	5.38886	5.95148	2.19025	14.5431	1.58088	22.7485	2.10034	1.54369	0.251625	0.201009	0.173618	0.176752	0.328755	3.43095
																	CH19C003	CH19C003_gl5	Rhyolite	7474.35	160.397	0.682785	0.230518	4.57671	5.07628	2.0603	13.3146	1.71699	34.5338	0.867224	3.33994	0.260007	0.0620533	0.16997	0.247061	0.602882	2.79424
																	CH19C003	CH19C003_gl6	Rhyolite	9448.43	160.397	1.11801	0.219329	9.97074	7.66319	2.56769	13.3428	1.76106	63.3007	1.51351	3.56579	0.29181	0.123625	0.217555	0.127824	0.383171	3.04035
																	CH19C003	CH19C003_gl7	Rhyolite	7167.49	160.397	0.676199	0.176807	3.31189	4.27904	2.90406	16.0504	1.38206	36.3067	1.3497	2.06472	0.40889	0.129985	0.343857	0.218197	0.501163	3.32409
																	CH19C003	CH19C003_gl8	Rhyolite	7742.15	160.397	0.670093	0.230702	4.13974	5.28008	2.27812	14.2514	1.5362	27.5864	0.969529	2.08551	0.253261	0.0555606	0.477045	0.141638	0.502111	2.77778
																	CH19C003	CH19C003_gl9	Rhyolite	10980.2	160.397	0.901762	0.405023	4.53589	17.3842	2.70722	18.8599	1.39853	121.713	2.61544	2.72767	0.39769	0.108231	0.414483	0.276916	0.487973	3.08284
																	CH19C003	CH19C003_gl10	Rhyolite	5937.13	160.397	0.607284	0.206983	4.74067	5.68171	2.4537	16.3761	1.52789	25.7788	1.14004	2.49773	0.581038	0.0719997	0.540365	0.130399	0.364461	3.38025
																	CH19C003	CH19C003_gl11	Rhyolite	6949.59	160.397	0.794634	0.220711	4.21472	4.26685	2.01275	12.578	1.55314	26.2494	1.19302	2.28222	0.317466	0.0676164	0.444395	0.111389	0.373803	4.05197
																	CH19C003	CH19C003_gl12	Rhyolite	7738.48	160.397	0.66159	0.187112	2.68152	4.00333	2.07733	13.8622	1.50592	25.2059	1.12206	2.212	0.237407	0.0364594	0.143662	0.223948	0.454242	2.53096
																	CH19C003	CH19C003_gl13	Rhyolite	8584.47	160.397	0.715138	0.207248	4.22467	3.74415	1.98193	13.8188	1.54891	25.1496	0.943565	2.10776	0.576765	0.0409236	0.199669	0.167069	0.318465	2.79172
																	CH19C003	CH19C003_gl14	Rhyolite	5812.13	160.397	0.740873	0.269518	3.41305	3.76835	2.10728	12.9644	1.79019	21.0921	0.845882	2.72377	0.322495	0.113352	0.150779	0.13956	0.390053	2.79196
																	CH19C003	CH19C003_gl16	Rhyolite	6457.51	160.397	0.889295	0.956018	8.03557	4.55223	2.22819	14.9784	1.61764	29.0881	1.49905	3.9862	0.660383	0.0694461	0.267645	0.0828492	0.374211	2.8005
																	CH19C009	CH19C009_gl1	Rhyolite	9824.01	161.51	0.743471	0.182939	5.59766	4.10435	2.43691	17.8874	1.52611	20.0821	1.06983	2.24096	0.327213	0.130609	0.221075	0.159796	0.489121	3.09252
																	CH19C009	CH19C009_gl2	Rhyolite	7949.31	161.51	0.854143	0.224471	3.12477	6.37513	2.78246	19.6173	1.82832	27.8229	4.2528	3.00878	1.00628	0.172773	0.339799	0.133819	0.439245	2.69356
																	CH19C009	CH19C009_gl3	Rhyolite	11053.8	161.51	0.7777	0.240499	2.80374	3.79996	2.30295	15.6948	1.5275	25.6965	1.71095	1.95276	0.510843	0.0421076	0.278471	0.175957	0.557197	2.86668
																	CH19C009	CH19C009_gl4	Rhyolite	11657.2	161.51	1.3973	0.473231	6.6509	7.40826	3.11016	34.4909	1.95312	42.9049	4.88326	1.96377	0.651382	0.069349	0.316137	0.0984989	0.489114	3.94164
																	CH19C009	CH19C009_gl5	Rhyolite	6114.08	161.51	0.70176	0.281458	2.84168	5.03785	2.54408	15.8257	1.49571	27.5704	1.01148	2.52755	0.288632	0.12516	0.308337	0.16821	0.415954	2.78673
																	CH19C009	CH19C009_gl6	Rhyolite	15391.7	161.51	0.79105	0.229564	3.87201	4.73711	2.74395	17.8927	1.61418	32.4102	3.52649	2.79757	0.718029	0.113579	0.400128	0.133764	0.485889	3.27507
																	CH19C009	CH19C009_gl7	Rhyolite	14860.3	161.51	0.837791	0.267972	8.73361	7.78957	2.33297	26.7579	1.70609	30.2986	1.86952	2.84229	0.333601	0.0667269	0.15595	0.137162	0.672718	2.75321
																	CH19C009	CH19C009_gl8	Rhyolite	14809.9	161.51	0.936996	0.272746	5.21199	4.82008	2.12717	17.0728	2.00406	29.0614	1.67376	1.7377	0.572229	0.0577157	0.267867	0.317794	0.613359	2.73504
																	CH19C009	CH19C009_gl9	Rhyolite	6613.86	161.51	0.702665	0.178727	3.66491	5.99356	2.39029	13.7079	1.57765	33.1296	1.6029	4.40863	0.253964	0.0561657	0.328806	0.126661	0.400865	3.03511
																	CH19C009	CH19C009_gl10	Rhyolite	7011.84	161.51	0.675098	0.202192	3.61159	4.76682	1.99437	13.5229	1.53508	22.5999	0.996953	3.63452	0.207222	0.08563	0.270854	0.119976	0.512685	2.58298
																	CH19C009	CH19C009_gl14	Rhyolite	10220.1	161.51	0.917033	0.528766	5.54842	7.39034	2.56586	18.9395	1.73309	40.0084	2.562	4.04035	0.505074	0.112667	0.434112	0.315109	0.506906	2.10903
																	CH19C009	CH19C009_gl15	Rhyolite	11959.4	161.51	0.6945	0.308782	3.12357	5.6485	1.95022	12.8149	1.41111	23.3532	0.989898	1.81474	0.318494	0.0574516	0.285301	0.138938	0.573501	2.93546
																	CH19C009	CH19C009_gl16	Rhyolite	10130.6	161.51	0.641659	0.193373	5.73905	7.04968	2.1296	14.961	1.56374	59.2742	1.04699	3.15076	0.285184	0.0899365	0.471679	0.100856	0.405209	3.41561
																	CH19C009	CH19C009_gl17	Rhyolite	13262.6	161.51	0.72462	0.174961	2.90327	5.36982	2.43914	16.1354	1.3774	24.6673	1.67028	1.75861	0.24142	0.0854312	0.206213	0.123675	0.433023	2.454
																	CH19C009	CH19C009_gl18	Rhyolite	17059	161.51	0.660906	0.208835	4.74119	5.52978	2.45699	16.2359	1.50768	30.1702	1.79616	2.74494	0.462313	0.0977674	0.363405	0.173208	0.455215	2.60393
																	CH19C009	CH19C009_gl19	Rhyolite	7465.39	161.51	0.898138	0.292387	3.44736	4.48889	2.63015	19.3387	1.81108	29.3222	1.5446	3.64438	0.356851	0.0819145	0.383413	0.114403	0.509546	2.46863
																	CH19C009	CH19C009_gl20	Rhyolite	20255	161.51	0.866743	1.20283	5.29485	5.14002	1.98026	18.3708	1.9059	38.3401	2.96874	2.47421	0.381241	0.0874412	0.226851	0.250679	0.424295	2.63797
																	CH19C007	CH19C007_gl2	Andesite	12837.8	393.036	1.69435	2.28842	9.90074	5.83802	4.2537	29.1934	1.42243	25.0544	1.35116	2.42981	0.418901	0.185767	0.4606	0.348482	0.579363	2.20164
																	CH19C007	CH19C007_gl3	Andesite	15222.3	393.036	1.6705	2.12944	8.21973	7.92467	4.19935	29.1221	1.34242	21.2881	1.2911	2.16927	0.417614	0.0896384	0.268188	0.153924	1.09039	2.2231
																	CH19C007	CH19C007_gl5	Andesite	36374.2	393.036	2.59047	3.18322	14.3049	7.5905	5.26578	31.8092	2.53343	56.4685	3.18566	5.2393	0.844979	0.0892929	0.607283	0.375919	0.80344	6.14924
																	CH19C007	CH19C007_gl12	Andesite	25799	393.036	1.53906	5.74704	16.0372	6.3488	4.17468	34.4139	2.45808	71.1617	3.53142	6.63853	0.576878	0.0705813	0.481255	0.302123	0.990163	2.91497
																	CH19C007	CH19C007_gl14	Andesite	6961.6	393.036	1.77074	4.66237	3.11711	10.241	4.51595	39.1325	1.59093	27.0433	1.86208	7.62153	0.982241	0.169468	0.505763	0.360683	0.777959	2.73216
																	CH19C007	CH19C007_gl15	Andesite	7655.39	393.036	2.11081	3.23269	5.33944	10.4763	4.61362	32.2612	1.4416	37.4583	2.64115	3.27839	0.451111	0.170164	0.748027	0.377341	0.935563	2.33161
																	CH12020_1	CH12020_1_gl1	Andesite	8080.46	372.648	1.79483	4.33497	3.57914	7.72078	4.73658	25.5662	1.12907	47.7787	1.66901	5.82423	0.379947	0.0789896	0.961619	0.302999	1.05015	2.16556
																	CH12020_1	CH12020_1_gl2	Andesite	7223.14	372.648	1.2545	3.1601	2.69322	6.13238	3.44934	23.5542	1.12592	23.0881	0.870731	1.78514	0.310965	0.0750053	0.398709	0.178264	0.484175	1.6881
																	CH12020_1	CH12020_1_gl3	Andesite	7508.9	372.648	1.47466	3.09667	2.97145	7.77051	3.5109	23.6747	1.20072	17.5051	0.926926	1.61156	0.507787	0.109483	0.307021	0.141183	0.442146	1.7396
																	CH12020_1	CH12020_1_gl6	Andesite	14060.1	372.648	1.38962	3.25872	4.9971	5.4321	3.453	23.0872	1.16756	16.2024	0.856882	2.06534	0.287505	0.0641147	0.3116	0.193297	0.42714	2.23211
																	CH12020_1	CH12020_1_gl7	Andesite	14854.5	372.648	1.36414	2.87274	3.76076	5.99546	3.41543	23.3576	1.17199	19.6952	1.03399	1.90813	0.335902	0.0806612	0.273167	0.288975	0.573022	2.80985
																	CH12020_1	CH12020_1_gl8	Andesite	8259.86	372.648	1.46359	3.8717	2.55392	10.6406	3.85938	23.4227	1.24815	28.0161	1.57652	2.0864	1.66756	0.141273	2.07621	0.205154	0.821071	1.61558
																	CH12020_1	CH12020_1_gl9	Andesite	11738.2	372.648	1.34552	2.66095	6.64766	5.44136	3.48133	23.2187	1.32703	16.9684	0.948326	2.08627	0.382738	0.0662844	0.630853	0.462133	0.471028	1.64823
																	CH12020_1	CH12020_1_gl10	Andesite	6422.69	372.648	1.69032	2.51582	2.97715	7.44276	3.52425	23.7963	1.17319	15.8536	1.01267	1.50279	0.47486	0.0699789	0.209326	0.119064	0.545309	1.80496
																	CH12020_1	CH12020_1_gl11	Andesite	9833.63	372.648	1.24611	2.38608	5.84846	6.40428	3.38012	23.338	1.15855	16.3943	0.800218	1.57497	0.293136	0.0569239	0.188769	0.18275	0.406821	1.73432
																	CH12020_1	CH12020_1_gl12	Andesite	10273.4	372.648	1.23937	2.76001	3.88135	6.75483	3.35992	23.6402	1.26025	19.4951	0.833125	1.91979	0.230713	0.0719922	0.465816	0.187111	0.514307	1.82266
																	CH12020_1	CH12020_1_gl13	Andesite	5012.28	372.648	1.37134	2.64931	2.4142	5.44598	3.39565	23.2385	1.22857	16.7773	0.877808	1.60794	0.407949	0.0831412	0.24966	0.177692	0.551386	1.57192
																	CH12020_1	CH12020_1_gl14	Andesite	5607.76	372.648	1.18747	2.55019	3.38323	7.64099	3.35486	22.9932	1.01641	23.7469	1.35412	1.41429	0.632999	0.137902	0.44098	0.421366	0.541815	1.77225
																	CH12020_1	CH12020_1_gl15	Andesite	22896.4	372.648	1.58007	2.91508	8.52562	26.1655	4.81505	32.856	1.50056	29.731	2.36627	2.8119	1.13934	0.227967	0.620556	0.455157	1.33695	2.35172
																	83069	83069_gl3	Andesite	14077.5	361.321	1.39431	2.55339	3.77716	5.67382	3.92186	25.3622	1.27425	23.8937	1.38969	1.71254	0.416127	0.0673931	0.442708	0.207838	0.550385	4.85723
																	83069	83069_gl4	Andesite	13848.1	361.321	1.34202	2.83225	10.2158	8.60287	3.75465	25.0603	1.40513	24.1435	1.0359	1.95056	0.298588	0.109024	0.413458	0.167146	0.469091	2.62789
																	83069	83069_gl5	Andesite	20351.1	361.321	1.62969	3.76963	6.98535	11.5289	4.1909	26.1758	1.54762	31.7948	1.55765	2.26142	0.879181	0.176785	0.806009	0.157196	0.828121	6.61068
																	83069	83069_gl6	Andesite	8659.33	361.321	1.41979	2.9853	5.84572	6.90708	4.1064	26.7077	1.35672	27.819	1.57765	1.71536	0.386169	0.124222	0.475716	0.472143	0.54574	3.78155
																	83069	83069_gl7	Andesite	12345.5	361.321	1.78553	2.51106	4.67563	6.82245	3.96367	30.164	1.25225	28.7183	1.13145	1.70613	3.14304	0.34717	0.544434	0.445795	1.20303	1.91686
																	83069	83069_gl11	Andesite	15076.4	361.321	1.51701	2.91734	3.7866	10.084	4.9437	29.3141	1.40796	24.9665	1.29276	1.91465	0.624886	0.0885515	0.401176	0.285181	0.517059	4.21385
																	83069	83069_gl12	Andesite	10522.2	361.321	1.70835	3.15094	12.081	7.51477	3.55817	24.8104	1.53126	18.1539	1.15833	1.95117	0.463222	0.136237	1.50951	0.500853	0.839674	2.16028
																	83069	83069_gl14	Andesite	6291.82	361.321	1.46622	2.47893	3.72938	10.7338	4.2593	25.6409	1.17411	33.5259	1.16515	2.12363	0.924435	0.0987106	0.303743	0.21284	0.491022	1.78858
																	83069	83069_gl15	Andesite	25894.2	361.321	1.76453	5.6308	9.33809	6.27852	3.74774	30.7705	1.28597	56.8639	1.998	4.4527	0.376249	0.0877375	0.290779	0.255595	0.481335	3.84409
																	CH12020_2	CH12020_2_gl1	Andesite	6755.06	437.968	1.38845	3.24992	3.37791	7.82365	3.4892	23.3722	1.26832	24.5661	1.13542	1.5817	0.393248	0.0675953	0.19885	0.208765	0.464571	1.53533
																	CH12020_2	CH12020_2_gl4	Andesite	14872	437.968	1.77888	3.30352	7.25766	9.64775	3.75617	24.1276	1.18687	24.97	1.40882	2.05533	0.674652	0.0648732	0.407394	0.527728	0.504708	2.32617
																	CH12020_2	CH12020_2_gl5	Andesite	11637.9	437.968	1.53627	2.8208	3.32441	7.66862	25.0987	24.5936	1.17869	26.3285	2.81332	3.777	0.966849	0.321851	0.847518	3.0381	0.824261	1.70715
																	CH12020_2	CH12020_2_gl7	Andesite	13414.1	437.968	1.40971	2.79874	3.9855	6.08308	3.39646	23.0591	1.22159	24.3993	0.901184	2.31975	0.39268	0.0762913	0.345065	0.161463	0.453746	2.02838
																	CH12020_2	CH12020_2_gl8	Andesite	6333.24	437.968	1.39528	2.75025	3.50244	5.91125	3.78388	27.1356	1.22134	21.1092	1.26992	2.0138	0.331367	0.0536643	0.266975	0.225746	0.466563	1.79343
																	CH12020_2	CH12020_2_gl9	Andesite	12316.3	437.968	1.31528	3.14832	6.32474	7.40774	7.30471	23.9472	1.26455	45.307	3.37866	3.2935	0.399353	0.346556	1.67076	0.538305	0.499484	1.64185
																	CH12020_2	CH12020_2_gl11	Andesite	9783.97	437.968	1.36306	3.24418	3.19868	7.01464	4.35696	26.2975	1.30792	19.2728	1.19803	1.91857	0.320696	0.0749772	0.227619	0.221544	0.543314	1.98087
																	CH12020_2	CH12020_2_gl12	Andesite	13006.6	437.968	1.37049	2.56498	5.30742	6.77418	4.08253	24.6366	1.20265	30.2891	1.01863	2.11033	0.500002	0.0619272	0.232756	0.133348	0.518621	2.06506
																	CH12020_2	CH12020_2_gl14	Andesite	5429.93	437.968	1.38538	2.5918	2.72099	7.91439	4.05975	25.9205	1.16911	19.1502	1.04119	1.95913	0.368628	0.0861606	0.34913	0.13223	0.505415	1.7476
																	CH12020_2	CH12020_2_gl15	Andesite	7080.19	437.968	1.27296	3.0357	2.93887	6.83165	3.16677	21.0949	1.37236	20.444	1.19258	1.95345	0.303675	0.0526919	0.207682	0.116989	0.429266	2.44432
																	CH12020_2	CH12020_2_gl16	Andesite	22595.8	437.968	1.42479	4.54329	6.229	12.1322	3.10841	21.5431	1.31405	43.2326	1.24209	3.32704	0.283392	0.0801882	0.208175	0.154987	0.393752	4.61848
																	CH12020_2	CH12020_2_gl17	Andesite	13347.7	437.968	1.63462	3.22146	6.01654	6.11388	3.36082	23.3218	1.45708	21.4199	0.875475	2.28945	0.539921	0.0635599	0.337132	0.292865	0.458403	2.89177
																	CH12020_2	CH12020_2_gl18	Andesite	9308.13	437.968	1.46252	2.69472	3.11008	6.61025	3.78572	26.0812	1.37089	20.3598	0.966035	1.81672	0.315252	0.078749	0.260179	0.16774	0.692563	2.18698
																	CH12020_2	CH12020_2_gl19	Andesite	9432.94	437.968	1.37633	2.83051	4.26971	6.57951	3.31537	24.2444	1.40886	22.4786	1.03624	1.92853	0.25983	0.0495351	0.272807	0.190012	0.450726	2.3446
																	CH12020_2	CH12020_2_gl20	Andesite	9133.03	437.968	1.40503	3.22726	2.67664	6.09059	3.41201	21.7273	1.30949	22.3133	1.0893	1.65973	0.289901	0.0478685	0.200604	0.143716	0.400203	2.18785
																	CH12020_2	CH12020_2_gl21	Andesite	9000.23	437.968	1.44618	3.09003	2.87724	10.4679	4.15154	25.1291	1.15473	25.8457	2.75433	2.75912	0.630551	0.108605	0.354446	0.252866	0.896333	2.04434
																	CH12020_2	CH12020_2_gl23	Andesite	10348.2	437.968	1.43393	2.99679	4.72742	7.18282	3.38358	23.3916	1.3454	26.4856	1.16614	2.32285	0.292227	0.0445884	0.216683	0.159147	0.450924	2.60682
																	CH12020_2	CH12020_2_gl24	Andesite	9996.75	437.968	1.38098	3.09084	6.05656	7.02086	3.24189	21.4625	1.46065	22.4108	0.897193	2.31189	0.231755	0.0826655	0.27129	0.107599	0.419433	2.29628
																	CH12020_2	CH12020_2_gl25	Andesite	16325	437.968	1.51954	2.60488	5.88459	8.12527	4.09876	27.7925	1.37803	30.7401	2.0487	4.0162	0.608711	0.0686567	0.508128	0.371913	0.518185	2.1419
																	CH12020_2	CH12020_2_gl27	Andesite	18980.7	437.968	1.53337	6.54532	8.25818	13.8657	3.88322	34.2202	1.11802	63.8443	4.99591	5.91914	0.512029	0.136245	1.69845	0.571088	0.848605	2.26126

## Sheet: S3. Feldspar
Rock Type	Comment	Spot	Cao	K2o	Sio2	Al2o3	Na2o	Mgo	Feo	Total	An	Ab	Or
Phase 1 rhyolite	CH12022_Fspar1_core1	Core	7.94	0.49	58.67	26.56	6.36	0	0.2	100.22	0.396354	0.574522	0.0291237
Phase 1 rhyolite	CH12022_Fspar1_core2	Core	8.4	0.44	57.29	26.45	6.26	0.02	0.21	99.06	0.414772	0.559359	0.0258684
Phase 1 rhyolite	CH12022_Fspar1_core3	Core	7.98	0.48	58.51	26.43	6.37	0.01	0.21	99.98	0.397435	0.574102	0.0284637
Phase 1 rhyolite	CH12022_Fspar2_core1	Core	6.54	0.69	59.79	24.47	7.13	0	0.24	98.87	0.322738	0.63672	0.0405423
Phase 1 rhyolite	CH12022_Fspar2_core2	Core	7.86	0.5	58.63	25.9	6.57	0.01	0.22	99.69	0.386345	0.584393	0.0292624
Phase 1 rhyolite	CH12022_Fspar2_core3	Core	7.66	0.55	58.65	26.06	6.52	0	0.24	99.68	0.380838	0.586604	0.0325582
Phase 1 rhyolite	CH12022_Fspar3_core1	Core	8.42	0.42	57.79	26.49	6.29	0.01	0.22	99.63	0.414726	0.560643	0.0246312
Phase 1 rhyolite	CH12022_Fspar3_core2	Core	8	0.45	58.28	26.2	6.53	0.01	0.25	99.72	0.39307	0.580604	0.0263257
Phase 1 rhyolite	CH12022_Fspar3_core3	Core	8.29	0.43	57.73	26.37	6.32	0.01	0.23	99.37	0.40961	0.565093	0.0252972
Phase 1 rhyolite	CH12022_Fspar4_core1	Core	7.03	0.57	59.3	25.49	6.9	0.01	0.21	99.5	0.348106	0.618288	0.0336061
Phase 1 rhyolite	CH12022_Fspar4_core2	Core	7.22	0.55	59.23	25.57	6.88	0.01	0.21	99.65	0.355227	0.612553	0.0322195
Phase 1 rhyolite	CH12022_Fspar4_core3	Core	7.15	0.53	59.54	25.61	6.91	0.01	0.2	99.94	0.352469	0.616423	0.0311084
Phase 1 rhyolite	CH12022_Fspar5_core1	Core	8.09	0.46	57.1	25.86	6.19	0.01	0.21	97.93	0.407778	0.564615	0.0276071
Phase 1 rhyolite	CH12022_Fspar5_core3	Core	8.15	0.43	55.86	25.6	6.1	0	0.2	96.35	0.413692	0.56032	0.0259881
Phase 1 rhyolite	CH19C002_Fspar1_Core1	Core	7.96	0.47	57.84	26.06	6.49	0.02	0.21	99.06	0.392815	0.57957	0.0276159
Phase 1 rhyolite	CH19C002_Fspar1_core2	Core	8.1	0.47	57.82	26.27	6.47	0	0.21	99.33	0.397686	0.574839	0.0274752
Phase 1 rhyolite	CH19C002_Fspar1_Core3	Core	8.17	0.44	57.47	26.32	6.36	0.01	0.23	99.01	0.404394	0.569674	0.0259312
Phase 1 rhyolite	CH19C002_Fspar2_Core1	Core	7.98	0.46	58.15	26.27	6.56	0.01	0.23	99.66	0.3912	0.58195	0.0268498
Phase 1 rhyolite	CH19C002_Fspar2_Core2	Core	7.81	0.48	58.39	25.96	6.52	0.01	0.22	99.39	0.387013	0.584667	0.0283206
Phase 1 rhyolite	CH19C002_Fspar2_Core3	Core	7.88	0.48	58.41	26.23	6.49	0.02	0.21	99.71	0.390178	0.581524	0.0282986
Phase 1 rhyolite	CH19C002_Fspar3_core1	Core	8.56	0.39	57.4	26.89	6.24	0.02	0.3	99.8	0.421335	0.555808	0.0228563
Phase 1 rhyolite	CH19C002_Fspar3_core2	Core	8.27	0.38	57.41	26.6	6.34	0.02	0.36	99.38	0.409499	0.568098	0.0224036
Phase 1 rhyolite	CH19C002_Fspar3_core3	Core	8.99	0.4	56.62	27.12	6.05	0.02	0.3	99.49	0.440375	0.536296	0.0233297
Phase 1 rhyolite	CH19C002_Fspar4_Core1	Core	8.31	0.48	58.21	26.42	6.44	0	0.22	100.08	0.404666	0.567503	0.0278307
Phase 1 rhyolite	CH19C002_Fspar4_Core2	Core	6.8	0.62	59.55	25.08	7.04	0.02	0.21	99.31	0.33534	0.628255	0.0364046
Phase 1 rhyolite	CH19C002_Fspar4_Core3	Core	8.02	0.48	58.28	26.27	6.52	0	0.22	99.79	0.393326	0.578645	0.0280289
Phase 2 Rhyolite	CH12021_Fspar1_core1	Core	6.29	0.76	60.77	24.64	7.23	0	0.09	99.78	0.310182	0.645194	0.0446238
Phase 2 Rhyolite	CH12021_Fspar1_core2	Core	6.52	0.78	59.25	24.66	7.15	0	0.1	98.47	0.319804	0.634643	0.0455531
Phase 2 Rhyolite	CH12021_Fspar1_core3	Core	6.36	0.81	60.44	24.87	7.1	0	0.11	99.68	0.315277	0.636914	0.0478088
Phase 2 Rhyolite	CH12021_Fspar_Kcore1	Core	16.44	0.15	48.52	33.31	2.48	0	0.31	101.2	0.778909	0.212629	0.00846181
Phase 2 Rhyolite	CH12021_Fspar_Kcore2	Core	16.78	0.07	48.09	33.79	2.21	0	0.14	101.08	0.80431	0.191695	0.003995
Phase 2 Rhyolite	CH12021_Fspar_Kcore3	Core	16.76	0.1	47.99	33.59	2.18	0	0.16	100.78	0.804839	0.189443	0.00571771
Phase 2 Rhyolite	CH12021_Fspar2_core1	Core	6.31	0.78	60.53	24.88	7.4	0.01	0.1	100.01	0.305867	0.649115	0.0450179
Phase 2 Rhyolite	CH12021_Fspar2_core2	Core	6.13	0.78	60.86	24.84	7.34	0	0.1	100.04	0.301357	0.652986	0.0456566
Phase 2 Rhyolite	CH12021_Fspar2_core3	Core	6.16	0.79	60.83	24.86	7.34	0	0.11	100.09	0.30221	0.651644	0.0461468
Phase 2 Rhyolite	CH12021_Fspar3_core1	Core	8.82	0.49	57.82	27.17	6.15	0	0.13	100.57	0.429562	0.542024	0.0284145
Phase 2 Rhyolite	CH12021_Fspar3_core2	Core	8.72	0.47	57.74	27.05	6.24	0	0.16	100.38	0.423885	0.548912	0.027203
Phase 2 Rhyolite	CH12021_Fspar3_core3	Core	8.77	0.48	57.66	27.02	6.15	0	0.15	100.23	0.428418	0.543663	0.0279188
Phase 2 Rhyolite	CH12021_Fspar5_core1	Core	5.54	1.04	61.18	24.14	7.24	0.01	0.13	99.28	0.278673	0.659038	0.0622883
Phase 2 Rhyolite	CH12021_Fspar5_core2	Core	5.35	1.06	61.47	23.87	7.39	0	0.13	99.27	0.267699	0.66915	0.0631517
Phase 2 Rhyolite	CH12021_Fspar5_core3	Core	5.41	0.97	61.39	23.89	7.61	0	0.13	99.39	0.266029	0.677178	0.0567925
Phase 2 Rhyolite	83070_Fspar1_core1	Core	6.2	0.77	60.92	25.15	7.39	0	0.12	100.55	0.302589	0.652667	0.0447444
Phase 2 Rhyolite	83070_Fspar1_core2	Core	6.6	0.76	60.54	25.39	7.31	0	0.11	100.7	0.31833	0.638025	0.043645
Phase 2 Rhyolite	83070_Fspar1_core3	Core	6.82	0.7	60.2	25.49	7.17	0	0.14	100.5	0.330612	0.628984	0.0404035
Phase 2 Rhyolite	83070_Fspar3_core1	Core	6.87	0.64	59.29	25.52	6.94	0	0.12	99.37	0.340255	0.622004	0.0377411
Phase 2 Rhyolite	83070_Fspar3_core2	Core	6.96	0.65	59.57	25.44	7.02	0	0.13	99.77	0.340552	0.62158	0.0378682
Phase 2 Rhyolite	83070_Fspar3_core3	Core	6.93	0.69	59.6	25.55	6.88	0	0.12	99.78	0.34304	0.616292	0.0406675
Phase 2 Rhyolite	83070_Fspar4_core1	Core	5.95	0.82	60.99	24.82	7.41	0	0.11	100.09	0.29259	0.659398	0.0480114
Phase 2 Rhyolite	83070_Fspar4_core2	Core	6.26	0.81	60.97	25.03	7.39	0	0.13	100.57	0.30392	0.649257	0.0468228
Phase 2 Rhyolite	83070_Fspar4_core3	Core	6.71	0.73	59.97	25.21	7.09	0	0.11	99.83	0.328771	0.628642	0.0425873
Phase 2 Rhyolite	83070_Fspar5_core1	Core	6.25	0.8	60.58	24.99	7.31	0	0.1	100.01	0.30591	0.647468	0.046622
Phase 2 Rhyolite	83070_Fspar5_core2	Core	6.23	0.82	60.93	25.09	7.31	0	0.11	100.48	0.304875	0.647347	0.0477787
Phase 2 Rhyolite	83070_Fspar5_core3	Core	6.2	0.83	60.53	24.93	7.31	0	0.11	99.89	0.303675	0.64792	0.0484042
Phase 2 Rhyolite	83070_Fspar7_core1	Core	6.59	0.77	60.56	25.19	7.14	0	0.12	100.36	0.322605	0.632514	0.0448811
Phase 2 Rhyolite	83070_Fspar7_core2	Core	6.47	0.72	59.87	24.98	7.24	0	0.12	99.41	0.316708	0.641328	0.0419638
Phase 2 Rhyolite	83070_Fspar7_core3	Core	6.34	0.78	60.7	25.09	7.28	0	0.12	100.32	0.310135	0.644435	0.04543
Andesite	CH120202_Fspar1_score1	Score	15.96	0.15	48.88	33.12	2.5	0.03	0.25	100.89	0.772409	0.218948	0.00864356
Andesite	CH120202_Fspar1_score2	Score	17.17	0.1	47.34	34.21	1.91	0.03	0.23	100.99	0.827652	0.166609	0.00573938
Andesite	CH120202_Fspar1_score3	Score	16.36	0.15	48.44	33.28	2.41	0.03	0.24	100.92	0.782784	0.208671	0.00854549
Andesite	CH120202_Fspar2_score1	Score	15.94	0.16	49.13	33.06	2.55	0.04	0.24	101.12	0.768377	0.22244	0.00918318
Andesite	CH120202_Fspar2_score2	Score	17.36	0.1	47.22	34.32	1.86	0.02	0.23	101.11	0.832816	0.161472	0.00571197
Andesite	CH120202_Fspar2_score3	Score	17.17	0.12	46.99	34.04	1.86	0.03	0.23	100.44	0.83032	0.16277	0.00690945
Andesite	CH120202_Fspar3_core1	G1core	16.68	0.12	48.06	33.88	2.13	0.04	0.23	101.14	0.806679	0.186411	0.00690992
Andesite	CH120202_Fspar3_core2	G1core	16.85	0.14	47.79	33.84	2.07	0.03	0.23	100.95	0.811555	0.180416	0.00802848
Andesite	CH120202_Fspar3_core3	G1core	16.44	0.15	48.29	33.31	2.37	0.04	0.24	100.83	0.786325	0.205133	0.00854237
Andesite	CH120202_Fspar4_core1	G1core	17.11	0.11	47.77	34.1	2.02	0.02	0.23	101.37	0.818801	0.174931	0.0062677
Andesite	CH120202_Fspar4_core2	G1core	17.35	0.1	47.1	34.52	1.91	0.03	0.24	101.24	0.829135	0.165175	0.00569001
Andesite	CH120202_Fspar4_core3	G1core	17.24	0.12	47.66	34.09	2.03	0.04	0.23	101.42	0.818753	0.174461	0.00678554
Andesite	CH120202_Fspar5_core1	Core	17.13	0.09	47.77	34.1	2.1	0.03	0.24	101.46	0.814266	0.18064	0.00509376
Andesite	CH120202_Fspar5_core2	Core	17.08	0.1	47.64	34.43	2	0.03	0.26	101.55	0.820432	0.173849	0.00571929
Andesite	CH120202_Fspar5_core3	Core	17.3	0.11	47.44	34.42	1.95	0.03	0.25	101.49	0.825393	0.168359	0.00624877
Andesite	CH120202_Fspar6_core1	Core	17.08	0.12	47.66	34.06	1.97	0.03	0.22	101.15	0.821635	0.171492	0.00687321
Andesite	CH120202_Fspar6_core2	Core	17.24	0.11	47.36	34.29	1.98	0.03	0.21	101.21	0.822754	0.170995	0.00625047
Andesite	CH120202_Fspar6_core3	Core	17.25	0.1	47.26	34.18	2	0.02	0.21	101.02	0.821887	0.17244	0.00567296
Andesite	CH120202_Fspar7_core1	Core	16.91	0.1	48	33.79	2.23	0.03	0.24	101.3	0.802772	0.191575	0.00565244
Andesite	CH120202_Fspar7_core2	Core	16.87	0.13	47.91	33.78	2.19	0.04	0.23	101.15	0.803799	0.188826	0.00737501
Andesite	CH120202_Fspar7_core3	Core	16.33	0.13	48.64	33.37	2.41	0.03	0.24	101.16	0.783365	0.20921	0.00742521
Andesite	CH120202_Fspar8_core1	Core	17.49	0.1	47.31	34.4	1.88	0.03	0.23	101.44	0.832415	0.161918	0.00566679
Andesite	CH120202_Fspar8_core2	Core	18.17	0.09	46.12	34.95	1.43	0.02	0.23	101.01	0.87084	0.124024	0.00513586
Andesite	CH120202_Fspar8_core3	Core	18.08	0.08	46.32	34.94	1.54	0.03	0.23	101.22	0.862511	0.132945	0.00454405
Andesite	CH120202_Fspar9_core1	Core	17.16	0.11	47.57	34.14	2.09	0.03	0.25	101.36	0.814309	0.179475	0.00621516
Andesite	CH120202_Fspar9_core2	Core	16.31	0.14	48.73	33.59	2.37	0.04	0.24	101.42	0.785438	0.206535	0.00802737
Andesite	CH120202_Fspar10_core1	Core	17	0.13	47.66	34.06	2	0.04	0.26	101.15	0.81833	0.174219	0.00745092
Andesite	CH120202_Fspar10_core2	Core	16.95	0.12	47.73	33.81	2.09	0.03	0.24	100.98	0.811977	0.181179	0.00684451
Andesite	CH120202_Fspar12_core1	G1core	16.75	0.16	48.17	33.9	2.23	0.03	0.23	101.46	0.798534	0.192384	0.00908208
Andesite	CH120202_Fspar13_core1	Core	15.81	0.14	49.35	32.94	2.66	0.04	0.24	101.18	0.760452	0.23153	0.0080178
Andesite	CH120202_Fspar13_core2	Core	17.05	0.11	48.11	33.76	2.15	0.04	0.25	101.48	0.809144	0.18464	0.00621557
Andesite	CH19C007_Fspar1_score1	Core	16.92	0.11	47.75	33.83	1.99	0.03	0.23	100.86	0.819287	0.174371	0.00634184
Andesite	CH19C007_Fspar1_score2	Core	16.93	0.11	47.77	34.03	2.05	0.02	0.25	101.16	0.815091	0.178603	0.00630564
Andesite	CH19C007_Fspar2_core1	G1core	15.79	0.16	49.04	33.03	2.62	0.03	0.25	100.91	0.762003	0.228803	0.00919352
Andesite	CH19C007_Fspar2_core2	G1core	16.4	0.13	48.42	33.16	2.34	0.03	0.24	100.71	0.788868	0.203687	0.00744545
Andesite	CH19C007_Fspar3_core1	Core	16.37	0.11	48.28	33.32	2.33	0.03	0.24	100.67	0.790158	0.20352	0.00632186
Andesite	CH19C007_Fspar3_core2	Core	16.17	0.14	48.5	33.04	2.37	0.03	0.23	100.48	0.783982	0.207936	0.00808185
Andesite	CH19C007_Fspar5_core1	G1core	17.44	0.1	47.46	34.15	1.88	0.03	0.23	101.29	0.832016	0.162304	0.00568031
Andesite	CH19C007_Fspar5_core2	G1core	16.79	0.12	47.99	33.76	2.06	0.03	0.25	100.99	0.812654	0.18043	0.0069155
Andesite	CH19C007_Fspar6_core1	Core	17.3	0.07	47.14	34	1.9	0.04	0.23	100.67	0.830867	0.16513	0.00400286
Andesite	CH19C007_Fspar6_core2	Core	17.38	0.09	47.27	34.02	1.82	0.02	0.23	100.84	0.836355	0.158489	0.00515668
Andesite	CH19C007_Fspar7_core1	G1core	16.68	0.12	47.93	33.77	2.24	0.03	0.24	101.02	0.798988	0.194168	0.00684404
Andesite	CH19C007_Fspar8_core1	Core	17.18	0.1	47.31	34.24	1.87	0.02	0.23	100.96	0.830632	0.163611	0.00575669
Andesite	CH19C007_Fspar9_core1	Core	16.81	0.09	47.52	33.76	2.11	0.03	0.24	100.57	0.810689	0.184143	0.00516792
Andesite	CH19C007_Fspar9_core2	Core	16.39	0.11	48.3	33.31	2.37	0.03	0.25	100.76	0.787611	0.206095	0.0062938
Andesite	CH19C007_Fspar9_core3	Core	16.34	0.14	48.37	33.19	2.34	0.03	0.25	100.67	0.787804	0.204159	0.00803677
Andesite	CH19C007_Fspar10_core1	Core	17.08	0.09	47.58	33.86	2.02	0.04	0.22	100.89	0.819476	0.175382	0.00514136
Andesite	CH19C007_Fspar10_core2	Core	17.13	0.1	47.34	34.07	1.89	0.03	0.22	100.78	0.828768	0.165472	0.00576053
Andesite	CH19C007_Fspar10_core3	Core	17.28	0.11	47.41	34.27	1.88	0.03	0.22	101.21	0.830248	0.163459	0.0062928
Andesite	CH19C007_Fspar11_core3	Core	16.99	0.09	47.36	33.87	2.03	0.03	0.24	100.62	0.81798	0.176861	0.00515916
Phase 1 rhyolite	CH12022_Fspar1_rim1	Rim	7.8	0.51	57.65	25.82	6.28	0.01	0.23	98.29	0.394505	0.574783	0.0307125
Phase 1 rhyolite	CH12022_Fspar1_rim2	Rim	8.24	0.47	57.98	26.33	6.31	0.01	0.2	99.54	0.407552	0.56477	0.0276784
Phase 1 rhyolite	CH12022_Fspar2_rim1	Rim	8.09	0.51	57.99	26.38	6.48	0.01	0.23	99.69	0.396111	0.574156	0.0297321
Phase 1 rhyolite	CH12022_Fspar2_rim3	Rim	7.68	0.49	58.4	26.22	6.57	0.01	0.24	99.61	0.381092	0.589957	0.0289502
Phase 1 rhyolite	CH12022_Fspar3_rim1	Rim	8.15	0.43	58.3	26.45	6.59	0	0.23	100.15	0.395874	0.579257	0.0248688
Phase 1 rhyolite	CH12022_Fspar3_rim2	Rim	8.4	0.43	57.73	26.58	6.3	0.01	0.24	99.68	0.413537	0.561258	0.0252052
Phase 1 rhyolite	CH12022_Fspar4_rim1	Rim	7.94	0.52	58.97	26.43	6.63	0.01	0.23	100.72	0.386245	0.583636	0.0301185
Phase 1 rhyolite	CH12022_Fspar4_rim2	Rim	8	0.48	58.54	26.46	6.55	0.02	0.21	100.25	0.391686	0.580332	0.0279819
Phase 1 rhyolite	CH12022_Fspar5_rim3	Rim	8.13	0.45	57.73	26.2	6.43	0	0.21	99.15	0.400461	0.573148	0.0263918
Phase 1 rhyolite	CH19C002_Fspar1_Rim1	Rim	8.15	0.44	58.88	27.02	6.57	0.01	0.2	101.27	0.396342	0.578181	0.0254772
Phase 1 rhyolite	CH19C002_Fspar1_Rim2	Rim	8.08	0.56	58.49	26.39	6.66	0.02	0.22	100.41	0.388484	0.579458	0.032058
Phase 1 rhyolite	CH19C002_Fspar1_Rim3	Rim	8.31	0.48	59.44	27.06	6.5	0.01	0.2	102	0.402538	0.569778	0.0276843
Phase 1 rhyolite	CH19C002_Fspar2_Rim1	Rim	7.9	0.5	59.9	26.62	6.89	0.02	0.21	102.02	0.376844	0.594758	0.0283983
Phase 1 rhyolite	CH19C002_Fspar2_Rim2	Rim	7.8	0.56	58.26	25.99	6.5	0.02	0.23	99.36	0.38558	0.58146	0.0329606
Phase 1 rhyolite	CH19C002_Fspar2_Rim3	Rim	7.07	0.8	59.97	24.44	6.17	0.03	0.3	98.78	0.368462	0.581896	0.0496422
Phase 1 rhyolite	CH19C002_Fspar3_Rim1	Rim	8.07	0.46	58.95	26.63	6.58	0.01	0.22	100.92	0.39318	0.580136	0.0266847
Phase 1 rhyolite	CH19C002_Fspar3_Rim2	Rim	8.1	0.46	59	26.68	6.56	0.01	0.23	101.03	0.39476	0.578547	0.0266927
Phase 1 rhyolite	CH19C002_Fspar3_Rim3	Rim	8.07	0.49	58.91	26.53	6.56	0.01	0.21	100.78	0.393189	0.578386	0.0284257
Phase 1 rhyolite	CH19C002_Fspar4_Rim1	Rim	7.8	0.5	58.07	25.71	6.63	0.01	0.23	98.94	0.382483	0.588325	0.0291927
Phase 1 rhyolite	CH19C002_Fspar4_Rim2	Rim	7.54	0.6	58.36	25.48	6.7	0.01	0.26	98.94	0.369992	0.594952	0.0350558
Phase 1 rhyolite	CH19C002_Fspar4_Rim3	Rim	7.7	0.57	57.78	25.75	6.71	0.02	0.24	98.77	0.375222	0.591706	0.0330719
Phase 2 Rhyolite	CH12021_Fspar_rim1	Rim	5.56	1.39	62.19	23	6.52	0	0.29	98.95	0.292421	0.620536	0.0870432
Phase 2 Rhyolite	CH12021_Fspar_rim2	Rim	5.23	1.54	62.72	22.29	6.15	0.01	0.35	98.29	0.287477	0.611735	0.100788
Phase 2 Rhyolite	CH12021_Fspar_rim3	Rim	5.93	1.23	61.35	23.24	6.45	0	0.24	98.44	0.311016	0.612173	0.0768105
Phase 2 Rhyolite	CH12021_Fspar_Krim3	Rim	16.25	0.11	48.99	33.51	2.45	0	0.14	101.45	0.780705	0.213003	0.00629235
Phase 2 Rhyolite	CH12021_Fspar5_rim1	Rim	5.04	1.14	61.89	23.61	7.58	0	0.15	99.4	0.250569	0.681949	0.0674821
Phase 2 Rhyolite	CH12021_Fspar5_rim2	Rim	5.44	1.03	61.06	23.86	7.45	0	0.14	98.97	0.270002	0.66913	0.0608684
Phase 2 Rhyolite	CH12021_Fspar5_rim4	Rim	5.64	1.16	61.82	23.84	6.89	0	0.18	99.54	0.289388	0.639745	0.0708674
Phase 2 Rhyolite	CH12021_Fspar6_1	Micropheno	7.83	0.58	58.65	26.33	6.46	0	0.17	100.02	0.387419	0.578412	0.0341691
Phase 2 Rhyolite	CH12021_Fspar6_2	Micropheno	7.77	0.59	58.43	26.02	6.41	0	0.16	99.37	0.387104	0.577898	0.0349982
Phase 2 Rhyolite	CH12021_Fspar6_3	Micropheno	7.67	0.63	58.78	25.95	6.64	0	0.19	99.86	0.375319	0.587976	0.0367056
Phase 2 Rhyolite	CH12021_Fspar6_4	Micropheno	7.43	0.64	59.22	25.65	6.73	0	0.18	99.85	0.364739	0.597853	0.0374076
Phase 2 Rhyolite	83070_Fspar1_rim1	Rim	6.61	0.8	60.9	25.46	7.29	0	0.12	101.18	0.318483	0.635622	0.0458947
Phase 2 Rhyolite	83070_Fspar1_rim2	Rim	6.19	0.81	61.04	25.22	7.42	0	0.1	100.78	0.300751	0.65239	0.0468586
Phase 2 Rhyolite	83070_Fspar1_rim3	Rim	6.4	0.74	59.95	25.25	7.19	0	0.1	99.63	0.315392	0.641188	0.0434199
Phase 2 Rhyolite	83070_Fspar2_1	Micropheno	6.2	0.79	60.23	25.06	7.36	0	0.12	99.75	0.303039	0.650986	0.045975
Phase 2 Rhyolite	83070_Fspar2_2	Micropheno	6.24	0.82	60.45	24.87	7.36	0.01	0.11	99.87	0.30387	0.648585	0.0475449
Phase 2 Rhyolite	83070_Fspar2_3	Micropheno	6.34	0.8	60.42	24.94	7.29	0	0.13	99.91	0.3095	0.644	0.0464996
Phase 2 Rhyolite	83070_Fspar2_4	Micropheno	6.26	0.77	60.43	24.95	7.4	0	0.14	99.95	0.304357	0.651069	0.0445745
Phase 2 Rhyolite	83070_Fspar3_rim1	Rim	6.51	0.75	59.87	25.07	7.29	0	0.12	99.6	0.316095	0.640546	0.0433595
Phase 2 Rhyolite	83070_Fspar3_rim2	Rim	6.24	0.77	60.09	24.72	7.33	0	0.12	99.27	0.305563	0.649542	0.0448947
Phase 2 Rhyolite	83070_Fspar3_rim3	Rim	6.24	0.78	60.6	25.07	7.29	0	0.12	100.09	0.306471	0.647916	0.0456128
Phase 2 Rhyolite	83070_Fspar4_rim2	Rim	5.92	1.05	60.81	24.02	6.92	0	0.17	98.89	0.300618	0.635897	0.0634849
Phase 2 Rhyolite	83070_Fspar5_rim1	Rim	5.9	1.06	61.01	24.15	6.92	0.01	0.18	99.22	0.299726	0.636158	0.0641159
Phase 2 Rhyolite	83070_Fspar5_rim4	Rim	5.7	1.09	63.24	24.26	6.94	0	0.19	101.43	0.291462	0.642175	0.0663623
Phase 2 Rhyolite	83070_Fspar6_1	Micropheno	6.71	0.75	60.14	25.28	7.19	0	0.14	100.21	0.325505	0.631176	0.0433195
Phase 2 Rhyolite	83070_Fspar6_2	Micropheno	6.15	0.86	60.88	24.97	7.35	0	0.12	100.34	0.300372	0.649617	0.0500114
Phase 2 Rhyolite	83070_Fspar6_3	Micropheno	6.49	0.79	60.65	25.23	7.19	0	0.13	100.48	0.317487	0.636498	0.0460146
Phase 2 Rhyolite	83070_Fspar7_rim1	Rim	6.49	0.79	60.3	25.09	7.27	0.01	0.13	100.07	0.315255	0.639054	0.045691
Phase 2 Rhyolite	83070_Fspar7_rim2	Rim	7.08	0.68	59.84	25.52	7.04	0	0.12	100.29	0.3432	0.617552	0.0392474
Andesite	CH120202_Fspar1_srim1	Srim	17.26	0.09	46.81	33.96	1.84	0.03	0.22	100.21	0.833943	0.160879	0.00517756
Andesite	CH120202_Fspar1_srim2	Srim	16.53	0.12	47.47	33.29	2.09	0.03	0.25	99.79	0.808116	0.184899	0.00698505
Andesite	CH120202_Fspar2_srim1	Srim	16.28	0.14	48.78	33.38	2.4	0.04	0.24	101.25	0.783077	0.208905	0.00801799
Andesite	CH120202_Fspar2_srim2	Srim	15.66	0.16	49.28	32.48	2.66	0.04	0.24	100.51	0.757837	0.232944	0.00921915
Andesite	CH120202_Fspar3_rim1	G1rim	16.97	0.11	47.36	34.02	2.04	0.03	0.23	100.76	0.816156	0.177545	0.00629899
Andesite	CH120202_Fspar3_rim2	G1rim	17.18	0.11	47.39	33.99	1.94	0.03	0.23	100.87	0.825104	0.168606	0.00629021
Andesite	CH120202_Fspar3_rim3	G1rim	17.16	0.1	47.39	34.04	1.97	0.04	0.24	100.94	0.823258	0.17103	0.00571223
Andesite	CH120202_Fspar4_rim1	G1rim	16.97	0.1	48.26	34.24	2.14	0.04	0.23	101.98	0.809574	0.184746	0.00568018
Andesite	CH120202_Fspar4_rim2	G1rim	16.43	0.11	49.64	33.92	2.45	0.03	0.25	102.83	0.782585	0.211177	0.00623841
Andesite	CH120202_Fspar4_rim3	G1rim	17.11	0.11	48.11	34.34	2.11	0.03	0.25	102.05	0.812469	0.181312	0.00621923
Andesite	CH120202_Fspar5_rim1	Rim	16.85	0.11	48.03	34.17	2.02	0.03	0.25	101.47	0.816519	0.177135	0.00634667
Andesite	CH120202_Fspar5_rim2	Rim	17.09	0.11	48.09	34.37	2.05	0.03	0.24	101.97	0.816505	0.177238	0.00625743
Andesite	CH120202_Fspar6_rim1	Rim	17.13	0.09	47.4	33.94	2	0.03	0.23	100.82	0.821331	0.173531	0.00513796
Andesite	CH120202_Fspar6_rim2	Rim	16.8	0.13	47.94	33.83	2.12	0.03	0.24	101.08	0.808035	0.18452	0.00744477
Andesite	CH120202_Fspar6_rim3	Rim	17.01	0.09	47.49	33.97	2.05	0.03	0.23	100.87	0.816733	0.178121	0.00514524
Andesite	CH120202_Fspar7_rim1	Rim	17.2	0.1	47.77	34.3	1.93	0.03	0.26	101.59	0.826461	0.167818	0.00572112
Andesite	CH120202_Fspar7_rim2	Rim	16.76	0.13	47.94	33.91	2.22	0.03	0.24	101.23	0.800683	0.191923	0.00739464
Andesite	CH120202_Fspar7_rim3	Rim	17.08	0.13	47.59	34	2.09	0.03	0.24	101.16	0.81268	0.179955	0.00736482
Andesite	CH120202_Fspar8_rim1	Rim	17.97	0.08	47.13	35.09	1.6	0.03	0.23	102.14	0.857321	0.138134	0.00454436
Andesite	CH120202_Fspar8_rim2	Rim	17.83	0.11	47.12	34.67	1.76	0.03	0.25	101.77	0.84319	0.150617	0.00619375
Andesite	CH120202_Fspar8_rim3	Rim	16.79	0.16	47.09	33.56	2.09	0.04	0.27	99.99	0.808665	0.182159	0.00917541
Andesite	CH120202_Fspar9_rim1	Rim	17.06	0.12	47.79	34.06	2.09	0.03	0.27	101.41	0.812963	0.180229	0.00680863
Andesite	CH120202_Fspar9_rim2	Rim	17.13	0.11	47.81	34.23	2.07	0.03	0.25	101.64	0.815447	0.178318	0.00623474
Andesite	CH120202_Fspar10_rim1	Rim	15.85	0.16	49.11	33.05	2.63	0.06	0.33	101.18	0.762027	0.228814	0.009159
Andesite	CH120202_Fspar10_rim2	Rim	17.03	0.1	47.48	33.63	2.04	0.04	0.26	100.58	0.817152	0.177135	0.00571314
Andesite	CH120202_Fspar11_1	Micropheno	16.61	0.12	48.11	34.01	2.12	0.03	0.24	101.24	0.806731	0.186329	0.00693949
Andesite	CH120202_Fspar11_2	Micropheno	15.75	0.15	48.81	32.86	2.6	0.03	0.24	100.45	0.763318	0.228026	0.00865572
Andesite	CH120202_Fspar12_rim1	G1rim	17.35	0.11	47.84	34.6	1.9	0.03	0.23	102.07	0.82938	0.164359	0.00626086
Andesite	CH120202_Fspar13_rim1	Rim	16.54	0.13	47.79	33.21	2.23	0.04	0.23	100.17	0.797869	0.194665	0.00746666
Andesite	CH120202_Fspar13_rim2	Rim	16.57	0.12	47.72	33.02	2.26	0.03	0.24	99.96	0.796535	0.196597	0.00686832
Andesite	CH19C007_Fspar1_srim1	Srim	17.24	0.13	46.75	34.05	1.81	0.03	0.24	100.25	0.834051	0.15846	0.00748835
Andesite	CH19C007_Fspar1_srim2	Srim	16.98	0.11	46.82	33.72	1.89	0.03	0.23	99.77	0.827036	0.166585	0.00637921
Andesite	CH19C007_Fspar2_rim1	G1rim	17.16	0.1	46.88	34.19	1.89	0.02	0.25	100.48	0.829016	0.165232	0.00575218
Andesite	CH19C007_Fspar2_rim2	G1rim	17.15	0.1	47.45	34.1	1.98	0.03	0.24	101.04	0.822459	0.171831	0.00571001
Andesite	CH19C007_Fspar3_rim1	Rim	17.11	0.09	46.93	33.94	1.87	0.04	0.26	100.24	0.830537	0.164262	0.00520162
Andesite	CH19C007_Fspar3_rim2	Rim	17.11	0.1	47.2	33.77	1.95	0.03	0.24	100.4	0.824268	0.169996	0.00573595
Andesite	CH19C007_Fspar4_1	Micropheno	17.21	0.11	47.24	34.13	1.94	0.03	0.25	100.91	0.825355	0.168364	0.00628116
Andesite	CH19C007_Fspar4_2	Micropheno	16.82	0.13	47.26	33.59	2.03	0.03	0.27	100.13	0.814595	0.177909	0.00749628
Andesite	CH19C007_Fspar5_rim1	G1rim	15.5	0.15	49.34	32.79	2.66	0.02	0.23	100.7	0.756386	0.234898	0.00871546
Andesite	CH19C007_Fspar5_rim2	G1rim	16.98	0.09	47.25	33.78	1.94	0.03	0.24	100.3	0.824359	0.170438	0.00520246
Andesite	CH19C007_Fspar6_rim1	Rim	17.21	0.11	46.91	33.64	1.94	0.04	0.26	100.11	0.825355	0.168364	0.00628116
Andesite	CH19C007_Fspar6_rim2	Rim	17.08	0.09	47.1	33.82	1.92	0.02	0.26	100.29	0.826653	0.16816	0.00518639
Andesite	CH19C007_Fspar7_rim1	G1rim	16.45	0.13	48.51	33.74	2.26	0.02	0.22	101.34	0.794897	0.197624	0.00747954
Andesite	CH19C007_Fspar8_rim1	Rim	16.82	0.1	47.6	33.92	2.07	0.02	0.24	100.79	0.813151	0.181093	0.00575615
Andesite	CH19C007_Fspar9_rim1	Rim	16.31	0.13	48.7	33.06	2.42	0.03	0.25	100.89	0.782477	0.210097	0.00742588
Andesite	CH19C007_Fspar9_rim2	Rim	15.75	0.15	49.08	32.74	2.57	0.02	0.24	100.56	0.765332	0.22599	0.00867856
Andesite	CH19C007_Fspar9_rim3	Rim	15.62	0.14	49.14	32.74	2.7	0.03	0.27	100.64	0.755588	0.236349	0.00806341
Andesite	CH19C007_Fspar10_rim1	G1rim	16.57	0.1	48.26	33.84	2.09	0.03	0.24	101.12	0.809431	0.184752	0.00581627
Andesite	CH19C007_Fspar10_rim2	G1rim	16.71	0.12	47.8	33.78	2.12	0.03	0.24	100.81	0.807665	0.185429	0.00690595
Andesite	CH19C007_Fspar11_rim1	G1rim	17.01	0.12	47.24	34.19	1.93	0.02	0.24	100.75	0.823911	0.169169	0.00692061
Andesite	CH19C007_Fspar11_rim2	G1rim	17.03	0.08	47.07	33.5	2.09	0.01	0.23	100.02	0.814546	0.180898	0.00455594
Andesite	CH120202_Gspar1_1	Glom	17.16	0.1	47.64	34.03	1.92	0.02	0.24	101.11	0.826847	0.167416	0.00573714
Andesite	CH120202_Gspar1_2	Glom	17.71	0.09	47.19	34.55	1.79	0.03	0.27	101.62	0.841076	0.153835	0.00508916
Andesite	CH120202_Gspar1_3	Glom	17.14	0.13	47.72	34.36	2.08	0.03	0.29	101.74	0.813912	0.178738	0.00735017
Andesite	CH120202_Gspar1_4	Glom	16.59	0.13	48.55	33.94	2.29	0.03	0.34	101.86	0.794205	0.198385	0.00740998
Andesite	CH120202_Gspar1_5	Glom	16.38	0.14	48.39	33.24	2.39	0.04	0.36	100.95	0.784796	0.207218	0.00798652
Andesite	CH120202_Gspar1_6	Glom	16.83	0.11	48.42	33.79	2.17	0.03	0.27	101.62	0.805732	0.187998	0.00627027
Andesite	CH120202_Gspar1_7	Glom	17.18	0.1	47.37	34.32	1.85	0.03	0.25	101.11	0.832088	0.162145	0.00576678
Andesite	CH120202_Gspar2_1	Glom	18.61	0.09	46.05	35.29	1.29	0.03	0.26	101.63	0.88402	0.11089	0.00509032
Andesite	CH120202_Gspar2_2	Glom	17.29	0.1	47.61	34.58	1.97	0.04	0.27	101.86	0.824354	0.16997	0.00567683
Andesite	CH120202_Gspar2_3	Glom	16.8	0.14	48.17	33.59	2.28	0.04	0.27	101.29	0.796487	0.19561	0.00790287
Andesite	CH120202_Gspar2_4	Glom	16.9	0.11	47.7	33.8	2.02	0.04	0.28	100.85	0.816962	0.176707	0.00633133
Andesite	CH120202_Gspar2_5	Glom	17.43	0.1	47.56	34.38	1.92	0.03	0.33	101.76	0.829071	0.165265	0.00566346
Andesite	CH120202_Gspar2_6	Glom	16.45	0.14	48.33	33.49	2.31	0.04	0.36	101.12	0.790983	0.201002	0.00801524
Andesite	CH120202_Gspar2_7	Glom	16.68	0.09	47.97	33.85	2.18	0.03	0.25	101.05	0.804549	0.190283	0.00516875
Andesite	CH120202_Gspar2_8	Glom	17.34	0.09	47	34.09	1.86	0.04	0.23	100.66	0.833131	0.16172	0.00514866
Andesite	CH19C007_GSpar_Core1	Glom	17.1	0.1	47.32	34.22	1.96	0.03	0.29	101.02	0.823465	0.170801	0.00573371
Andesite	CH19C007_GSpar_Core2	Glom	16.8	0.15	47.67	33.88	2.06	0.03	0.26	100.84	0.811343	0.180032	0.00862529
Andesite	CH19C007_GSpar_Core3	Glom	17.05	0.1	47.39	34.07	1.96	0.03	0.28	100.87	0.823039	0.171214	0.00574755
Andesite	CH19C007_GSpar_Core4	Glom	16.43	0.11	48.01	33.43	2.26	0.03	0.27	100.53	0.795615	0.198043	0.00634227
Andesite	CH19C007_GSpar_Core5	Glom	17.1	0.1	47.29	34.18	1.87	0.03	0.32	100.91	0.829974	0.164247	0.00577904
Andesite	CH19C007_GSpar_Rim1	Glom	16.49	0.11	48.44	33.75	2.27	0.03	0.24	101.33	0.795512	0.19817	0.00631838
Andesite	CH19C007_GSpar_Rim2	Glom	16.59	0.11	48.56	33.93	2.19	0.02	0.26	101.66	0.802068	0.1916	0.00633205
Andesite	CH19C007_GSpar_Rim3	Glom	16.4	0.11	48.68	33.91	2.3	0.03	0.24	101.67	0.792535	0.201136	0.00632928
Andesite	CH19C007_GSpar_Rim4	Glom	15.92	0.15	48.29	32.89	2.51	0.03	0.27	100.06	0.77129	0.220057	0.00865273
Andesite	CH19C007_GSpar_Rim5	Glom	15.93	0.14	48.2	32.92	2.51	0.03	0.28	100	0.771846	0.220077	0.00807663
Andesite	CH19C007_GSpar_Rim6	Glom	15.94	0.16	48.59	32.96	2.58	0.03	0.53	100.81	0.766371	0.224469	0.00915921

## Sheet: S4. Orthopyroxene
Raw Analyses
No.	Comment	CaO	TiO2	SiO2	Al2O3	MgO	P2O5	FeO	NiO	Cr2O3	MnO	Total		En	Fs	Wo
204	CH12020-2opx1_core1	1.3032	0.2514	52.1888	1.2299	19.8691	0.0037	23.5722	-0.0051	0.0599	0.4638	98.937		57.9434	39.3255	2.73108
205	CH12020-2opx1_core2	1.2436	0.1942	52.2744	1.2371	20.0603	-0.026	23.5668	0.0431	0.0445	0.5111	99.1492		58.2087	39.1982	2.59315
206	CH12020-2opx1_core3	1.2773	0.2044	51.9424	1.1831	19.7563	0.1036	24.424	0.0279	0.0017	0.4562	99.377		57.0455	40.3042	2.65036
207	CH12020-2opx1_core4	1.3457	0.2558	51.7271	1.2115	20.062	-0.0148	23.9555	-0.0076	0.0256	0.4246	98.9854		57.8045	39.4092	2.78633
208	CH12020-2opx1_core5	1.3256	0.2844	52.0585	1.2466	19.6644	-0.0093	23.8822	0.0304	0.0479	0.426	98.9568		57.4071	39.812	2.78096
209	CH12020-2opx1_rim1	1.2083	0.1909	51.7708	1.2313	19.6414	-0.0741	24.3871	-0.0304	0.0324	0.4007	98.7585		57.0708	40.4062	2.52298
210	CH12020-2opx1_rim2	1.2373	0.227	51.5638	1.1013	19.4699	0.0037	24.2419	-0.0152	0	0.5106	98.3403		56.8528	40.5509	2.59633
211	CH12020-2opx1_rim3	1.2238	0.2198	53.0447	1.116	19.692	0.0464	23.7771	0.0406	0.0325	0.4763	99.6693		57.6154	39.8115	2.5731
212	CH12020-2opx1_rim4	1.1898	0.2632	52.9584	1.1423	20.1567	-0.0371	24.2561	0.0684	0.0342	0.5248	100.557		57.731	39.8202	2.44884
213	CH12020-2opx1_rim5	1.2214	0.2809	52.2601	1.0759	19.5815	-0.0389	24.4657	0.0025	0.0171	0.4909	99.3571		56.8227	40.6302	2.54701
214	CH12020-2opx2_core1	1.146	0.2262	51.6351	0.9716	18.1807	0.0111	25.9388	0.0101	0.0254	0.4678	98.6128		53.7591	43.8057	2.43514
215	CH12020-2opx2_core2	1.1663	0.232	51.6837	1.013	18.3741	0.0314	26.4314	0.0202	-0.0034	0.5065	99.4553		53.5297	44.0286	2.44172
216	CH12020-2opx2_core3	1.2067	0.2232	52.1088	1.0021	18.4524	0.0443	26.3357	0.0557	-0.0051	0.4817	99.9056		53.6959	43.7807	2.52339
217	CH12020-2opx2_core4	1.1584	0.19	51.6323	0.9787	18.3106	-0.1182	26.615	0.0202	0.0085	0.5161	99.3117		53.2837	44.2939	2.42241
218	CH12020-2opx2_core5	1.1189	0.2098	51.841	0.8739	18.326	0.0407	25.6758	0	-0.0102	0.493	98.569		54.2006	43.4213	2.37807
219	CH12020-2opx2_rim1	1.2621	0.2399	51.7657	1.1159	18.6932	0.0018	25.4908	0.081	0.0374	0.475	99.1628		54.7104	42.6352	2.65446
220	CH12020-2opx2_rim2	1.1962	0.1782	51.0336	1.027	18.3019	-0.0517	26.0018	-0.0607	0.0356	0.483	98.145		53.7974	43.6759	2.52677
221	CH12020-2opx2_rim3	1.2534	0.256	50.7	0.9208	17.8365	0.0793	25.948	-0.0051	0.0085	0.5232	97.5207		53.1031	44.2153	2.68162
222	CH12020-2opx2_rim4	1.2381	0.2423	50.8538	0.9857	17.6124	-0.0387	26.3099	0.0152	-0.022	0.434	97.6307		52.5655	44.7791	2.65543
223	CH12020-2opx2_rim5	1.1817	0.261	52.0851	0.9755	19.1442	-0.0092	25.0284	-0.0633	0.0102	0.5057	99.1193		55.7833	41.7423	2.47441
224	CH12020-2opx3_core1	1.2937	0.3676	52.0497	1.5979	20.644	0.0111	22.6569	-0.0304	0.0395	0.376	99.0061		59.8458	37.4591	2.69507
225	CH12020-2opx3_core2	1.2465	0.2738	52.3102	1.366	20.5384	0.0352	23.506	-0.0253	0.0103	0.5079	99.7691		58.8375	38.5964	2.56612
226	CH12020-2opx3_core3	1.2648	0.2622	52.0859	1.4679	20.7302	-0.0445	22.5011	0.0355	-0.0069	0.3538	98.65		60.156	37.2065	2.63751
227	CH12020-2opx3_core4	1.3251	0.2699	52.2329	1.4779	20.7964	0.052	22.5451	-0.0025	0.0223	0.4209	99.1401		60.0478	37.2027	2.74951
228	CH12020-2opx3_core5	1.2167	0.2365	52.4081	1.3398	20.3319	0.0167	22.9575	0.0583	0.024	0.4067	98.9963		59.2526	38.1993	2.54806
229	CH12020-2opx3_rim1	1.299	0.2559	52.843	1.357	21.1097	-0.0686	23.6365	0.071	0.0445	0.4275	100.975		59.3911	37.9826	2.62631
230	CH12020-2opx3_rim2	1.1409	0.2059	51.5525	1.1446	20.0046	0.0056	24.1338	0.0355	0.0137	0.402	98.6392		57.8347	39.795	2.3703
231	CH12020-2opx3_rim3	1.2771	0.2507	52.6015	1.1715	19.2399	-0.0795	24.8892	-0.076	0.0204	0.492	99.7869		55.9344	41.3975	2.66808
232	CH12020-2opx3_rim4	1.2131	0.2658	50.6201	1.3146	19.8447	-0.0555	23.8613	-0.0228	0.0034	0.4491	97.4939		57.7634	39.6992	2.53747
233	CH12020-2opx3_rim5	1.3149	0.3072	51.5538	1.387	20.2529	-0.0742	22.6901	-0.0152	0.0223	0.3495	97.7884		59.3526	37.8783	2.76912
234	CH12020-2opx4_core1	1.3604	0.2258	52.0665	1.5464	20.3251	0.0593	23.2289	0.0507	0.0514	0.4064	99.321		58.8069	38.3646	2.82852
235	CH12020-2opx4_core2	1.2956	0.2649	52.4545	1.4533	21.0907	0.0278	23.2625	0.0152	0.0565	0.4733	100.394		59.6822	37.6831	2.63464
236	CH12020-2opx4_core3	1.363	0.2902	52.3463	1.3476	19.9541	-0.0667	23.9362	-0.0355	0.0444	0.4284	99.608		57.6666	39.5028	2.83064
237	CH12020-2opx4_core4	1.2635	0.2922	52.5685	1.3873	20.2992	0.1224	22.941	-0.0456	0.0103	0.4122	99.2511		59.1663	38.1872	2.64647
238	CH12020-2opx4_core5	1.2845	0.2722	52.0909	1.479	20.072	0.037	23.5018	0.0735	0.0274	0.4466	99.285		58.2968	39.0223	2.68093
239	CH12020-2opx4_rim1	1.2189	0.234	52.1776	1.2661	19.163	-0.0351	24.9557	0.0304	0.0732	0.5154	99.5993		55.8214	41.6271	2.55154
240	CH12020-2opx4_rim2	1.1805	0.1966	52.2085	1.0605	19.5068	-0.1018	24.938	-0.0278	-0.0204	0.4919	99.4329		56.3421	41.2076	2.45025
243	CH12020-2opx4_rim5	1.2345	0.2535	51.3762	0.9999	18.7312	-0.0814	24.6377	0.0051	0.0017	0.4223	97.5807		55.6197	41.7461	2.63421
244	CH12020-2opx5_core1	1.0961	0.2265	51.6167	1.1004	19.1577	0.061	24.9001	-0.043	0.0017	0.4473	98.5646		56.0729	41.6217	2.30546
245	CH12020-2opx5_core2	0.6879	0.2591	50.4422	3.0671	18.7871	0.0739	25.0853	0.043	0.0849	0.4456	98.9762		55.9062	42.6228	1.47103
246	CH12020-2opx5_core3	1.0528	0.2354	51.475	1.2339	19.1879	-0.0277	24.9966	-0.0253	0.0527	0.4653	98.6466		56.0572	41.7325	2.21028
247	CH12020-2opx5_core4	0.8451	0.2726	50.5997	2.5283	18.7334	-0.0407	25.1989	0.0076	0.0408	0.4706	98.6563		55.5197	42.6804	1.79985
248	CH12020-2opx5_core5	0.8245	0.2613	51.1753	1.973	19.6663	-0.0056	23.9416	-0.0431	0.1263	0.4478	98.3674		57.9412	40.3131	1.74563
249	CH12020-2opx5_rim1	1.2172	0.2656	51.9692	1.0195	19.5356	0.0055	24.6865	0.0076	0.0068	0.4947	99.2083		56.563	40.9044	2.53259
250	CH12020-2opx5_rim2	1.2589	0.2116	51.1974	1.1359	19.0575	0.122	24.7634	0.038	0.0272	0.4892	98.3011		55.8386	41.5108	2.65068
251	CH12020-2opx5_rim3	1.2473	0.2433	51.9576	1.0534	18.71	-0.037	24.5767	-0.0279	0.0153	0.399	98.1377		55.655	41.6788	2.66623
252	CH12020-2opx5_rim4	1.1867	0.1997	51.0953	1.057	19.2155	0.0241	24.4717	0.0177	0.0119	0.4393	97.719		56.4435	41.0516	2.50496
253	CH12020-2opx5_rim5	1.2076	0.2369	51.83	1.0881	19.1825	-0.0148	25.2291	0.0354	0.0119	0.5013	99.3081		55.6243	41.8593	2.5164
254	CH12020-2opx6_core1	1.1642	0.2511	51.4521	1.0454	17.6048	-0.0074	27.0278	-0.0455	-0.0017	0.4921	98.9829		51.9613	45.5694	2.4693
255	CH12020-2opx6_core2	1.1881	0.2378	50.9343	0.9989	18.228	0.0258	26.3783	0.0126	0.0288	0.5214	98.5541		53.3398	44.1618	2.4984
256	CH12020-2opx6_core3	1.1869	0.2094	51.4504	0.9984	18.1992	0.0719	26.6695	-0.0025	0.0118	0.4618	99.2569		53.1005	44.4109	2.48861
257	CH12020-2opx6_core4	1.1547	0.2604	51.4985	1.0127	18.4966	-0.1496	25.697	-0.0101	-0.022	0.5257	98.464		54.3407	43.2215	2.43781
258	CH12020-2opx6_core5	1.1727	0.2273	51.3499	0.8416	17.9491	0.024	26.51	0.0101	0.0186	0.5491	98.6525		52.8335	44.686	2.48056
259	CH12020-2opx6_rim1	1.1965	0.245	50.5772	1.0161	17.9491	-0.035	26.5198	0.0076	-0.0034	0.4794	97.9523		52.8599	44.6079	2.53217
260	CH12020-2opx6_rim2	1.2563	0.1993	51.3441	0.9699	18.5487	-0.0259	25.1114	0.0304	-0.017	0.5373	97.9546		54.8105	42.5217	2.66772
261	CH12020-2opx6_rim3	1.1932	0.1964	51.6588	1.0335	18.9083	0.0721	24.8977	0	-0.0136	0.4429	98.3893		55.6417	41.8351	2.52324
262	CH12020-2opx6_rim4	1.2817	0.2339	52.296	0.9065	19.2782	-0.0758	25.0766	-0.0228	0.0289	0.4652	99.4685		55.8323	41.5002	2.66749
263	CH12020-2opx6_rim5	1.3136	0.2338	52.0434	1.0012	19.0818	-0.0296	25.2125	-0.0051	0.0238	0.5012	99.3767		55.3867	41.8733	2.73997
264	CH12020-2opx7_core1	1.2881	0.2152	51.297	1.0646	17.7003	-0.0129	26.6686	0.0682	0.0203	0.4891	98.7986		52.2719	44.9945	2.7336
265	CH12020-2opx7_core2	1.25	0.2153	51.3905	1.11	17.768	0.129	26.3586	-0.0303	0.0085	0.506	98.7057		52.6646	44.6729	2.66249
266	CH12020-2opx7_core3	1.1824	0.2262	50.7802	0.8991	16.8358	0.0331	28.9041	0.0177	0.005	0.5848	99.4685		49.1847	48.333	2.48232
268	CH12020-2opx7_core5	1.2468	0.2457	50.7005	0.9922	17.0064	-0.0165	28.2074	0	0.0168	0.5738	98.9731		49.9459	47.4227	2.63137
269	CH12020-2opx7_rim1	1.2943	0.2533	51.99	0.9923	18.9651	-0.0517	25.2798	-0.0304	0.0017	0.5025	99.197		55.1955	42.0976	2.70695
270	CH12020-2opx7_rim2	1.2345	0.297	52.1245	1.1417	19.1872	0.0333	24.8942	0.0025	-0.0153	0.4694	99.3691		55.933	41.4809	2.58609
271	CH12020-2opx7_rim3	1.2175	0.3704	50.6035	0.9709	18.8312	0.1127	24.5607	-0.0557	0.0357	0.5125	97.1594		55.7579	41.6515	2.59057
273	CH12020-2opx7_rim5	1.2632	0.2291	51.5124	0.967	18.6648	0.0277	25.6283	0.0354	-0.0255	0.5563	98.8587		54.4747	42.876	2.64936
274	CH12020-2opx8_core1	1.1886	0.2714	52.243	1.4656	21.3788	-0.0668	21.7963	-0.0127	0.0309	0.4068	98.7019		61.6292	35.9085	2.46227
275	CH12020-2opx8_core2	1.2608	0.3102	52.0297	1.4165	20.9585	0.0297	22.4976	-0.0279	0.0223	0.4135	98.911		60.3676	37.0227	2.60968
276	CH12020-2opx8_core3	1.2467	0.3821	52.9113	1.4476	21.8149	-0.0521	21.3097	0.0507	0.0672	0.3473	99.5254		62.5777	34.8524	2.56995
277	CH12020-2opx8_core4	1.2206	0.2423	52.0772	1.3774	20.4745	0.0167	23.0723	-0.0228	0.1045	0.4065	98.9693		59.3058	38.1535	2.5407
278	CH12020-2opx8_core5	1.2882	0.3201	52.6344	1.2986	21.5284	0	21.3772	-0.0025	0.0276	0.4393	98.9114		62.0523	35.2794	2.66825
279	CH12020-2opx8_rim1	1.2607	0.2433	52.5059	1.2281	19.8814	0.0444	24.6475	-0.0025	-0.0119	0.3865	100.183		57.0788	40.3202	2.60098
280	CH12020-2opx8_rim2	1.2898	0.2224	51.6682	1.241	19.6449	-0.0444	24.1254	0.0101	0.0239	0.4688	98.6502		57.1574	40.1458	2.69676
281	CH12020-2opx8_rim3	1.2325	0.2241	52.8856	1.6929	22.3176	0.028	19.8334	0.0305	0.1541	0.3633	98.7621		64.6249	32.8104	2.5647
282	CH12020-2opx8_rim4	1.3011	0.2586	51.5299	1.3288	19.2168	0.0574	23.8126	0.0203	0.0205	0.4466	97.9927		56.9188	40.3118	2.76938
283	CH12020-2opx8_rim5	1.2039	0.2971	51.5386	1.4681	21.3131	0.039	22	0.0228	0.0584	0.3611	98.3022		61.3804	36.128	2.49156
284	CH12020-2opx9_core1	1.7917	0.2416	50.6756	1.3551	20.2522	-0.0761	21.2524	0	0.0448	0.4226	95.9599		60.0954	36.084	3.8206
285	CH12020-2opx9_core2	1.3391	0.278	52.8534	1.4238	21.5868	0.0632	21.5342	-0.0025	0.0276	0.3991	99.5028		61.9347	35.3044	2.76093
286	CH12020-2opx9_core3	1.3578	0.2819	52.2365	1.4353	20.453	0	22.6587	0.0101	0.0086	0.3943	98.8363		59.5225	37.6379	2.8396
287	CH12020-2opx9_core4	1.3787	0.3018	52.1951	1.66	21.3172	0.0446	21.7997	0.0152	0.0482	0.3597	99.1203		61.3629	35.7851	2.85196
288	CH12020-2opx9_core5	1.3157	0.2993	51.6429	1.4141	19.9074	0.0389	23.3805	0.0481	0.0205	0.4855	98.553		58.1364	39.1025	2.76113
289	CH12020-2opx9_rim1	1.2551	0.2459	51.4661	1.0469	19.0529	-0.0351	24.5872	0.0734	-0.0102	0.4916	98.1739		55.997	41.3522	2.65081
290	CH12020-2opx9_rim2	1.2209	0.2864	51.8515	1.1206	19.4213	0.024	24.8947	-0.0329	0.063	0.4319	99.2815		56.2818	41.1756	2.54254
291	CH12020-2opx9_rim3	1.2394	0.1891	52.4296	1.0719	19.5169	-0.0759	24.431	0.0481	-0.0068	0.5196	99.363		56.7255	40.6858	2.58867
292	CH12020-2opx9_rim4	1.2793	0.2506	52.3763	1.0503	19.119	0.0314	24.7969	-0.0709	0.0102	0.4237	99.2669		55.9242	41.3868	2.68908
293	CH12020-2opx9_rim5	1.3349	0.2796	52.1548	1.3117	19.5758	0.0389	23.4416	0.0101	0.0376	0.4909	98.6759		57.6401	39.5354	2.82456
294	CH12020-2opx10_core1	1.3275	0.2945	52.5123	1.3763	21.6309	0.0149	21.2209	-0.0152	0.0448	0.4184	98.8254		62.2917	34.9611	2.74718
295	CH12020-2opx10_core2	1.2716	0.2248	52.4388	1.2528	21.6619	-0.0316	21.7612	-0.0076	0.1273	0.4725	99.1718		61.8033	35.5896	2.60713
296	CH12020-2opx10_core3	1.3987	0.3201	52.5575	1.3242	21.468	0.052	21.4838	0.0279	0.0534	0.4002	99.0859		61.7775	35.3301	2.89241
297	CH12020-2opx10_core4	1.3804	0.1963	52.8629	1.2784	21.6548	-0.0223	21.6661	0.0101	0.0069	0.4169	99.4506		61.8074	35.3613	2.83132
298	CH12020-2opx10_core5	1.437	0.3173	52.2786	1.7347	21.523	0.0892	21.3796	-0.0025	0.0776	0.4116	99.2461		61.8813	35.1497	2.969
299	CH12020-2opx10_rim1	1.3488	0.2367	52.2285	0.8044	21.3065	-0.0835	22.3413	0.0482	0.0223	0.4502	98.7035		60.7671	36.4685	2.7644
300	CH12020-2opx10_rim2	1.2981	0.255	53.2422	0.9538	21.6501	-0.0873	22.0741	-0.0025	0.0172	0.453	99.8538		61.4685	35.883	2.64849
301	CH12020-2opx10_rim3	1.3114	0.2885	52.9669	1.393	21.6703	-0.0223	21.3119	0.0406	0.0241	0.4156	99.4001		62.2666	35.0255	2.70784
302	CH12020-2opx10_rim4	1.3385	0.2856	52.9093	1.5251	21.7265	-0.026	21.3474	-0.0279	0.0276	0.4215	99.5277		62.2511	34.9929	2.75596
303	CH12020-2opx10_rim5	1.4113	0.3074	53.4	1.6434	22.2647	0.0056	20.2332	-0.0076	0.0277	0.3773	99.6631		63.9022	33.187	2.91082
304	CH12020-2opx11_core1	1.1461	0.2616	51.9302	1.2745	20.0718	0.0519	23.4114	-0.0405	0.1112	0.4355	98.6538		58.5627	39.0343	2.403
305	CH12020-2opx11_core2	1.2336	0.2886	51.9702	1.4034	19.91	-0.0611	23.7516	0.0152	0.1179	0.484	99.1135		57.8889	39.5337	2.57748
306	CH12020-2opx11_core3	1.2632	0.3023	51.8678	1.6119	20.1995	0.0056	23.7164	0.0431	0.1916	0.3674	99.5688		58.3492	39.0286	2.62219
307	CH12020-2opx11_core4	1.2125	0.2888	52.1835	1.3324	19.8319	0.0334	23.6077	-0.0127	0.1488	0.4231	99.0495		58.0136	39.4376	2.54885
308	CH12020-2opx11_core5	1.2153	0.2768	52.1302	1.3762	20.0909	0.0259	23.667	0.0786	0.1351	0.4161	99.4122		58.2764	39.1904	2.53322
309	CH12020-2opx11_rim1	1.2806	0.2316	51.651	0.9811	20.3153	0.1222	23.8518	0.0279	0.0256	0.4244	98.9115		58.2853	39.0744	2.64026
310	CH12020-2opx11_rim2	1.2446	0.2431	51.28	1.0468	19.3789	0.0222	25.0226	-0.038	0	0.3864	98.5866		56.1256	41.2841	2.59035
311	CH12020-2opx11_rim3	1.3703	0.2631	52.2259	1.2359	19.8334	-0.1204	24.0358	0.038	0.0444	0.4661	99.3926		57.3811	39.77	2.84895
312	CH12020-2opx11_rim4	1.2662	0.2539	51.5961	1.1866	19.1446	-0.0241	24.2405	-0.0152	0	0.4784	98.1271		56.4362	40.8815	2.68232
313	CH12020-2opx11_rim5	1.3161	0.2764	51.536	1.2456	18.9708	0.0166	24.3266	-0.0228	0.0375	0.5173	98.2202		56.0354	41.171	2.79359
314	CH12020-2opx12_core1	1.2325	0.2456	51.2945	1.0836	18.9535	-0.0203	26.1286	-0.1139	-0.0187	0.5359	99.3214		54.4658	42.9891	2.54518
315	CH12020-2opx12_core2	1.268	0.2039	51.2609	0.93	18.6286	-0.0259	25.2486	-0.043	0.0238	0.4612	97.9562		54.8489	42.4682	2.6829
316	CH12020-2opx12_core3	1.1791	0.2666	51.4063	0.9173	18.405	0.0314	25.8478	-0.0456	0.0204	0.5359	98.5643		54.0456	43.4662	2.48813
317	CH12020-2opx12_core4	1.3239	0.2339	52.2806	1.3368	21.3541	-0.0557	21.9852	0.0076	0.0533	0.4309	98.9506		61.2189	36.0537	2.72745
318	CH12020-2opx12_core5	1.2803	0.3068	51.9897	1.4051	19.8032	0.013	23.7083	-0.0558	0.0735	0.4565	98.9807		57.7684	39.5477	2.68388
319	CH12020-2opx12_rim1	1.2652	0.3035	51.5767	1.2815	19.3594	-0.037	24.3537	0.0253	0.0171	0.4116	98.557		56.6691	40.6695	2.6614
320	CH12020-2opx12_rim2	1.2609	0.2738	51.4588	1.308	19.892	0.0482	23.3148	-0.0329	0.0188	0.4552	97.9977		58.2766	39.0688	2.65457
321	CH12020-2opx12_rim3	1.2644	0.1978	51.0614	0.9715	18.3203	-0.0148	25.7109	0.0228	0.0034	0.454	97.9918		54.0297	43.2906	2.67967
322	CH12020-2opx12_rim4	1.2598	0.2355	50.907	1.0355	18.9316	-0.0943	24.616	0.0177	0.0051	0.5139	97.4278		55.7866	41.5457	2.66773
323	CH12020-2opx12_rim5	1.2601	0.2941	52.4108	1.1478	19.479	0.0111	25.4237	-0.0253	-0.0358	0.5073	100.473		55.7616	41.6462	2.59221
324	CH12020-2opx13_core1	1.2165	0.2342	52.051	1.0471	19.211	-0.05	24.72	0.0025	-0.017	0.4741	98.8895		56.1401	41.3052	2.55466
325	CH12020-2opx13_core2	1.268	0.2913	52.4078	1.0135	19.4773	-0.0093	24.5443	0.0506	0.0119	0.5031	99.5586		56.5527	40.8016	2.6457
326	CH12020-2opx13_core3	1.2045	0.2477	52.353	1.0292	19.3497	0.074	24.9105	-0.0203	-0.0324	0.4727	99.5886		56.1579	41.33	2.51212
327	CH12020-2opx13_core4	1.1875	0.2716	52.0674	1.0048	19.4195	0.0758	24.7841	0.0506	0.0256	0.428	99.3149		56.4239	41.0967	2.47945
328	CH12020-2opx13_core5	1.267	0.2163	52.0467	0.9742	19.4533	-0.0389	24.5308	-0.038	0.0205	0.4673	98.8993		56.5694	40.7829	2.64766
329	CH12020-2opx13_rim1	1.2034	0.2031	52.9079	1.3388	19.8041	0.026	23.8432	0.0684	0.0068	0.4815	99.8833		57.7112	39.7687	2.52007
330	CH12020-2opx13_rim2	1.3244	0.2615	52.5161	1.0936	20.1193	-0.0315	24.4334	-0.0127	0.0034	0.4911	100.198		57.3944	39.8906	2.71502
331	CH12020-2opx13_rim3	1.2144	0.2554	51.4305	1.0426	19.844	-0.0537	24.2701	0.0304	-0.0188	0.4826	98.4976		57.3464	40.1316	2.52195
332	CH12020-2opx13_rim4	1.302	0.2328	51.3817	0.8417	19.2292	-0.0685	24.046	-0.038	0.0119	0.4768	97.4157		56.685	40.5568	2.75813
333	CH12020-2opx13_rim5	1.3187	0.2751	51.4489	1.1808	19.3319	-0.0185	23.9204	0	0.041	0.441	97.9394		56.9476	40.2608	2.79154
Average		1.24749	0.25399	51.8807	1.22095	19.6481	-0.00141667	24.1633	0.00370079	0.0277413	0.457925	98.9025
Sigma		0.217633	0.0756876	1.25402	0.593644	2.27664	0.110108	3.20449	0.0728842	0.0771721	0.0991905
Standard
	No.	CaO	TiO2	SiO2	Al2O3	MgO	P2O5	FeO	NiO	Cr2O3	MnO	Total
KAUG1.1	334	16.2438	0.8812	50.2538	8.0484	16.1889	0.0549	6.5941	0.028	0.2009	0.0965	98.5906
KAUG1.2	335	15.2019	0.8637	49.9068	8.1563	15.708	0.0568	6.2995	-0.0306	0.168	0.1036	96.434
KAUG1.3	336	15.2982	0.8432	50.3418	8.1723	15.8999	0.1045	6.427	0.0051	0.1242	0.1164	97.3327
KAUG1.1	334	15.1801	0.9317	49.7637	8.2389	16.0042	0.1365	6.4362	-0.0282	0.1487	0.1602	96.9721
KAUG1.2	335	14.935	0.8313	49.5004	8.278	16.0842	0.1788	6.2774	0.0717	0.165	0.1486	96.4705
KAUG1.3	336	15.1336	0.963	49.3159	8.2709	16.0487	0.0736	6.2637	0.0026	0.1961	0.1428	96.4109
KAUG1.1	334	15.2782	0.7282	50.6825	8.1925	15.8084	0.1378	6.3369	0.0409	0.1975	0.1294	97.5324
KAUG1.2	335	15.1129	0.8205	50.6344	8.1681	15.864	0.0404	6.1918	0.0357	0.2121	0.1549	97.2348
KAUG1.3	336	15.1533	0.7498	50.8208	8.3031	15.9105	0.1268	6.3045	0.0868	0.1389	0.1407	97.7353
KAUG1.1	334	15.5166	0.8935	50.7486	8.2274	16.0929	0.0881	6.2892	0.0204	0.1519	0.118	98.1467
KAUG1.2	335	15.4094	0.8916	50.7045	8.1504	15.8009	0.022	6.4323	0.0817	0.1774	0.1251	97.7954
KAUG1.3	336	15.6844	0.8688	50.943	8.2245	16.0853	0.0863	6.2012	0.0613	0.0677	0.0811	98.3037
KAUG1.1	334	16.2072	0.8498	50.6433	8.3378	15.9448	0.11	6.3223	0.0587	0.1684	0.1877	98.8301
KAUG1.2	335	15.6622	0.8128	50.7625	8.1314	15.6172	0.1412	6.4848	-0.0077	0.1536	0.1464	97.9045
KAUG1.3	336	15.5804	0.851	51.196	8.1651	15.9577	0.0129	6.3111	0.0639	0.1555	0.1763	98.47
	Avg	15.4398	0.852007	50.4145	8.20434	15.9344	0.0913733	6.3448	0.0326867	0.161727	0.13518	97.6109
	2 SD	0.770702	0.121945	1.10833	0.149693	0.314406	0.0964206	0.21918	0.0766839	0.0717435	0.0586991

## Sheet: S5. Oxides
Ilmenite
Rock Type	Spot	Comment	SiO2	TiO2	Al2O3	FeO	MnO	MgO	CaO	K2O	Cr2O3	ZnO	V2O3	NiO	Total		Fe2O3*	FeO*	Total	%Ilm*
Andesite	Rim	007_ox1_tp1	0.0088	49.6929	0.1567	43.9595	0.4606	2.5287	0.1276	0.02	0.0151	0.0112	0.7004	0.0102	97.6918		4.88371	39.5651	98.181	0.950348
Andesite	Rim	007_ox1_tp2	0.012	49.6519	0.163	43.6707	0.4249	2.5702	0.099	0.0163	0.0111	0.1035	0.7023	0.0163	97.4413		4.69135	39.4494	97.9112	0.952125
Andesite	Rim	007_ox1_tp3	0.0161	49.7176	0.1626	43.9271	0.4941	2.4809	0.1317	0.0186	0.023	0.0728	0.7279	0	97.7481		4.82259	39.5877	98.2556	0.950964
Andesite	Core	007_ox1_tp4	0.0152	49.7931	0.1732	43.9161	0.4229	2.3981	0.0765	0.0186	0.0143	0.0406	0.7494	0.0204	97.6385		4.38173	39.9734	98.0774	0.955485
Andesite	Core	007_ox1_tp5	0.0126	49.7697	0.1822	43.9501	0.4322	2.4872	0.0427	0.0042	0.0149	0.0224	0.7306	0.0258	97.6747		4.56736	39.8403	98.1322	0.953603
Andesite	Core	007_ox1_tp6	0.0101	49.6827	0.1818	43.5455	0.4352	2.5651	0.087	0.0213	0	0	0.7516	0	97.2191		4.40681	39.5802	97.7218	0.954982
Andesite	Rim	007_ox2_rim1	0.0196	49.8941	0.1943	43.8006	0.4848	2.5937	0.0327	0.0205	0	0.0364	0.7484	0	97.8041		4.53723	39.718	98.2797	0.953882
Andesite	NA	007_ox4_1	0.0287	49.695	0.1841	43.8539	0.4182	2.3522	0.0311	0.0225	0.0424	0	0.7277	0.0048	97.2613		4.19205	40.0819	97.7806	0.957345
Andesite	NA	007_ox4_1	0.0009	49.5934	0.1744	43.8152	0.4823	2.2517	0.044	0.0131	0.0141	0	0.6672	0.0211	97.0257		4.17898	40.0549	97.4961	0.957417
Andesite	Core	007_ox6_cr1	0.033	48.5735	0.1413	42.4545	0.5022	2.6139	0.1252	0.0258	0.0088	0.0308	0.7801	0	95.2606		4.52949	38.3788	95.7429	0.952596
Andesite	Rim	007_ox6_rm2	0.0285	49.9254	0.1618	43.3931	0.458	2.5872	0.0304	0.0269	0	0.0854	0.7747	0	97.4572		4.04299	39.7552	97.8765	0.958729
Andesite	Core	007_ox8_1	0.0209	49.9387	0.1662	43.3919	0.4639	2.597	0.0831	0.0144	0.0356	0.0546	0.7318	0.0068	97.505		4.10933	39.6943	97.9166	0.958055
Andesite	Rim	007_ox8_3	0.0473	49.5728	0.1715	43.3211	0.4534	2.6403	0.0852	0.0317	0.0036	0.0714	0.708	0.0068	97.1132		4.4548	39.3126	97.5594	0.954319
Andesite	Rim	007_ox8_4	0.0538	49.8851	0.1709	43.2372	0.4617	2.533	0.0448	0.0199	0.0173	0.0294	0.7186	0	97.1633		3.73876	39.873	97.5463	0.961755
Andesite	NA	007_ox10_1	0.0298	49.8128	0.1548	43.311	0.4361	2.7017	0.0871	0.0251	0.0225	0.0587	0.7887	0	97.4264		4.3193	39.4245	97.8611	0.955809
Andesite	NA	007_ox10_2	0.0386	49.8574	0.1596	43.3062	0.4331	2.6538	0.1198	0.0227	0.0259	0.0531	0.7653	0	97.4285		4.20049	39.5266	97.8564	0.957044
Andesite	NA	007_ox10_3	0.0338	49.962	0.1618	43.5314	0.4472	2.67	0.0854	0.0273	0.0166	0.021	0.7862	0	97.7357		4.32006	39.6442	98.1755	0.955982
Andesite	NA	007_ox10_4	0.0606	49.8098	0.1616	43.1158	0.4392	2.7153	0.0582	0.0381	0.0078	0	0.7457	0.0139	97.1535		3.99614	39.52	97.5664	0.959026
Andesite	Core	007_ox10_1	0.0119	50.2089	0.1652	43.4677	0.4868	2.6419	0.0176	0.0134	0.0087	0.0923	0.8056	0	97.9086		3.99385	39.874	98.3202	0.959379
Andesite	Core	007_ox10_2	0.0033	50.1552	0.1827	43.3667	0.4704	2.596	0	0.0133	0.0029	0	0.7756	0	97.5524		3.72173	40.0179	97.939	0.962088
Andesite	Rim	007_ox10_3	0.0524	47.0644	0.1673	45.6526	0.399	2.4343	0.0456	0.0253	0.0227	0.0685	0.7503	0	96.6794		9.0183	37.5379	97.586	0.907625
Andesite	Rim	007_ox10_4	0.146	48.5686	0.1702	44.2624	0.4869	2.6071	0.0505	0.0135	0.0169	0	0.77	0	97.0775		6.22616	38.66	97.7159	0.936191
Andesite	Incl	007_ox14_1	0.0286	49.7986	0.1762	43.5649	0.4426	2.5277	0.0454	0.0093	0.0138	0.0601	0.7891	0	97.4523		4.22188	39.766	97.8793	0.956935
Andesite	Incl	007_ox14_2	0.0396	49.8036	0.1724	43.6106	0.4768	2.5787	0.0489	0.0149	0.0405	0	0.8094	0.001	97.563		4.33861	39.7067	98.0311	0.955767
Andesite	Incl	007_ox14_3	0.0341	49.7522	0.1838	43.514	0.4323	2.5996	0.0281	0.0142	0.0182	0	0.7978	0.003	97.3773		4.25165	39.6883	97.8033	0.956584
Andesite	Rim	007_ox15_1	0.0094	50.0546	0.1705	43.083	0.5011	2.8795	0.0128	0.0202	0.0304	0.0084	0.7675	0.0118	97.5492		4.12155	39.3744	97.9621	0.957819
Andesite	Rim	007_ox15_2	0.0191	50.1054	0.17	43.1396	0.4913	2.8546	0.0181	0.0207	0.0059	0	0.7844	0	97.5863		4.05972	39.4866	98.0158	0.958502
Andesite	Rim	007_ox15_3	0.0125	49.8368	0.1538	43.3637	0.48	2.8616	0.0111	0.0197	0.0064	0.0042	0.7913	0	97.5283		4.58137	39.2413	98.0001	0.95316
Andesite	NA	007_ox17_1	0.0211	49.7793	0.1594	43.361	0.4637	2.6323	0.0358	0.0282	0.1366	0.0251	0.7837	0	97.4194		4.2075	39.5751	97.8478	0.956968
Andesite	NA	007_ox17_2	0.0351	49.7686	0.1703	43.2644	0.4596	2.6106	0.0311	0.0143	0.1517	0.0531	0.7699	0.003	97.3317		4.06541	39.6063	97.739	0.958372
Andesite	NA	007_ox17_3	0.0295	49.6864	0.1602	43.3323	0.4394	2.6389	0.04	0.0418	0.1782	0	0.7963	0.0237	97.3123		4.2244	39.5311	97.7899	0.956741
Andesite	NA	007_ox17_4	0.0292	49.4849	0.1688	43.6311	0.4919	2.582	0.0424	0.0328	0.144	0	0.7552	0	97.3522		4.7081	39.3947	97.834	0.951853
Andesite	Core	007_ox20_1	0.0129	50.156	0.1678	43.6184	0.4299	2.5916	0.0224	0.0118	0.0138	0.0265	0.7646	0	97.7948		3.99148	40.0268	98.2156	0.959456
Andesite	Core	007_ox20_2	0.0041	50.2187	0.1729	43.4344	0.4492	2.6858	0.0159	0.0204	0.0164	0.046	0.7679	0	97.8303		3.95422	39.8764	98.2279	0.959771
Andesite	Core	007_ox20_3	0.0131	50.0826	0.1804	43.3164	0.4259	2.6586	0.0153	0.0025	0.0093	0.1046	0.7812	0	97.5642		3.92371	39.7858	97.983	0.959973
Andesite	Core	007_ox20_4	0	50.8151	0.1692	44.0742	0.4471	2.7302	0.0111	0.0074	0.0148	0.0586	0.7518	0.0014	99.0784		4.16559	40.326	99.4983	0.958175
Andesite	Core	007_ox20_5	0.0017	50.828	0.1717	44.1336	0.4996	2.6436	0.0139	0.0181	0.0037	0.0795	0.7667	0.0044	99.1646		4.12847	40.4188	99.5781	0.958583
Andesite	NA	007_ox21_1	0	50.2389	0.1716	43.5065	0.5007	2.6333	0.0155	0.0159	0.0053	0.0098	0.827	0.0213	97.9434		3.93748	39.9635	98.3403	0.959984
Andesite	NA	007_ox21_2	0.0238	50.1187	0.1688	43.4413	0.4936	2.5629	0.0265	0.0159	0.0162	0.0851	0.7948	0.0118	97.7595		3.89564	39.936	98.1497	0.960334
Andesite	NA	007_ox22_1	0.0416	49.4956	0.1775	43.3414	0.4268	2.7503	0.0434	0.0228	0	0.0907	0.823	0	97.1775		4.7095	39.1037	97.685	0.951675
Andesite	Rim	007_ox23_1	0.02	50.2103	0.1782	43.2964	0.4682	2.5728	0.076	0.0119	0.0234	0.0864	0.798	0.0064	97.748		3.71086	39.9573	98.1198	0.962187
Andesite	Rim	007_ox23_2	0.0171	49.6113	0.1524	43.6711	0.4195	2.5998	0.0723	0.0135	0.0061	0	0.7766	0	97.2876		4.63861	39.4972	97.8044	0.952647
Andesite	Rim	007_ox23_3	0.0296	49.5381	0.1653	43.8397	0.4224	2.6263	0.1245	0.0202	0	0.1575	0.7809	0	97.6941		5.16715	39.1903	98.2222	0.947303
Andesite	Rim	007_ox25_1	0.0448	49.5646	0.1679	43.0946	0.4496	2.7289	0.1598	0.0332	0.0095	0	0.7946	0	97.0238		4.42201	39.1156	97.4905	0.954527
Andesite	Rim	007_ox25_2	0.0247	49.7973	0.1652	43.1049	0.397	2.6921	0.0947	0.0176	0.0205	0.0557	0.806	0	97.169		4.05738	39.454	97.5822	0.958386
Andesite	Incl	007_ox27_1	0.0191	50.0121	0.1749	42.8451	0.4522	2.8214	0.0504	0.0132	0	0	0.8212	0.001	97.1652		3.76191	39.4601	97.5875	0.961382
Andesite	Incl	007_ox27_2	0.0461	49.6136	0.1565	42.7572	0.4026	2.737	0.1347	0.0281	0.025	0.0418	0.8146	0.0108	96.7681		3.96474	39.1897	97.1652	0.959093
Andesite	Rim	007_ox29_1	0.0191	49.9469	0.1685	43.504	0.4458	2.4567	0.0198	0.0279	0.0217	0.039	0.7675	0	97.4052		3.82437	40.0628	97.8001	0.961026
Andesite	Rim	007_ox29_2	0.067	49.6972	0.1867	43.4891	0.4314	2.6319	0.0345	0.0199	0.0152	0.0432	0.7366	0.003	97.3558		4.34971	39.5752	97.7915	0.955543
Andesite	Rim	0202_tp1	0.0048	50.8103	0.194	43.1636	0.4701	3.1933	0.0429	0.0305	0.0716	0.0543	0.8617	0	98.8844		4.13638	39.4417	99.3115	0.95801
Andesite	Rim	0202_tp2	0.0053	50.3448	0.2052	42.4021	0.457	3.2796	0.0512	0.0138	0.061	0.1533	0.9056	0.0084	97.8874		4.01995	38.7849	98.2901	0.958632
Andesite	Rim	0202_tp3	0.015	50.2397	0.1869	42.6995	0.4418	3.1867	0.0617	0.0183	0.0821	0.0641	0.8655	0.001	97.8624		4.16895	38.9482	98.28	0.957207
Andesite	Incl	0202_ox1	0.0036	50.5042	0.1625	42.7473	0.4529	3.1877	0.0104	0.0107	0.0768	0.039	0.8418	0	98.0275		3.8896	39.2474	98.4266	0.960207
Andesite	Incl	0202_ox2	0	50.5562	0.171	42.626	0.4325	3.2367	0.0103	0	0.0525	0.032	0.8087	0.0108	97.9318		3.77469	39.2295	98.3149	0.961348
Andesite	Incl	0202_tp1	0.0275	50.2304	0.1944	42.5655	0.4173	3.2934	0.0496	0.0163	0.1054	0.0557	0.6435	0.0074	97.6065		4.17104	38.8124	98.0243	0.957111
Andesite	Lrg glom	0202_bg_tp1	0.0097	49.6925	0.1608	42.9372	0.5503	3.1058	0.0274	0.0232	0.0578	0.0237	0.7802	0	97.3635		4.86059	38.5636	97.8556	0.949966
Andesite	Lrg glom	0202_bg_tp2	0.0041	49.6728	0.1702	43.2347	0.673	3.1198	0.0333	0.0111	0.0614	0	0.7905	0.004	97.7374		5.36935	38.4033	98.3129	0.944898
Andesite	Sml glom	0202_tp3_1	0.0039	50.5036	0.1866	42.6121	0.4626	3.0253	0.0354	0.0213	0.0569	0	0.8387	0	97.6982		3.42608	39.5293	98.0897	0.964903
Andesite	Sml glom	0202_tp3_2	0.0069	50.6179	0.1947	42.496	0.4453	3.1036	0.0193	0.0156	0.0515	0.0821	0.8622	0	97.8887		3.37206	39.4618	98.233	0.965447
Andesite	Sml glom	0202_tp4_1	0.003	50.4182	0.1862	42.7755	0.4596	3.1785	0.0361	0.0197	0.0305	0	0.8497	0.025	97.9208		3.99536	39.1804	98.3823	0.959103
Andesite	Sml glom	0202_tp4_2	0.0029	50.5274	0.1653	42.8436	0.3965	3.0954	0.0292	0.0183	0.0965	0.0028	0.8225	0.0104	98.0109		3.71928	39.497	98.3834	0.962008
Andesite	Core	015_ox1_cr1	0	50.5955	0.1855	43.2235	0.4173	3.1165	0.0086	0	0.0429	0.0529	0.8233	0	98.4436		4.16228	39.4782	98.883	0.957692
Andesite	Core	015_ox1_cr2	0.0016	50.6533	0.2152	43.3671	0.4272	3.0961	0.0205	0.0128	0.0393	0	0.8111	0	98.6177		4.19774	39.5899	99.0648	0.957427
Andesite	Rim	015_ox1_rm1	0.0166	50.5385	0.1725	42.9843	0.4312	3.1742	0.0395	0.0235	0.0556	0.1275	0.8332	0	98.3783		4.17851	39.2244	98.8153	0.957379
Andesite	Rim	015_ox1_rm2	0.0373	50.3532	0.1702	42.9557	0.4313	3.0946	0.0168	0.0248	0.0519	0.0719	0.8475	0	98.0336		4.06002	39.3025	98.462	0.958504
Andesite	Rim	015_ox1_rm3	0.0195	50.7899	0.1745	43.2036	0.4872	3.0761	0.0185	0.011	0.0599	0	0.8643	0	98.6667		3.88075	39.7117	99.0933	0.960625
Andesite	Core	015_ox2_cr1	0.1214	50.6273	0.2639	43.075	0.4508	3.0041	0.0421	0.0238	0.0298	0.0162	0.8136	0.0274	98.4955		3.63087	39.8079	98.8592	0.963052
Andesite	Core	015_ox2_cr2	0.0012	50.6011	0.192	43.1892	0.5106	3.0725	0.0697	0.014	0.0698	0.0324	0.8147	0	98.5624		4.20171	39.4085	98.9882	0.957274
Andesite	Core	015_ox2_cr3	0.0163	50.8177	0.1974	43.1957	0.4703	2.9566	0.0055	0.0182	0.0625	0.0189	0.8406	0	98.5809		3.59271	39.9629	98.9597	0.963561
Andesite	Rim	015_ox2_rm1	0.0251	50.3509	0.1929	43.163	0.4812	3.1995	0.0284	0.0405	0.0505	0	0.9194	0	98.4422		4.51887	39.0969	98.9042	0.953914
Andesite	Rim	015_ox4_tp1	0.0078	50.743	0.1878	43.1636	0.4324	3.1095	0.0167	0.0177	0.0702	0.0391	0.8438	0	98.6219		3.93901	39.6192	99.0263	0.959995
Andesite	Rim	015_ox4_tp2	0.0026	50.4717	0.1853	43.375	0.411	3.1466	0.0251	0.0176	0.0748	0	0.8205	0.0026	98.5221		4.4751	39.3483	98.9812	0.954532
Andesite	Rim	015_ox4_tp3	0.0045	50.6293	0.179	43.5048	0.4598	2.9388	0.0178	0.024	0.0612	0	0.8631	0	98.6683		4.09215	39.8227	99.0923	0.958561
Andesite	Core	015_ox4_tp9	0.0108	50.6592	0.1938	42.8759	0.4317	3.3603	0.0365	0.0332	0.0352	0	0.8116	0	98.4237		4.18496	39.1102	98.8675	0.957306
Andesite	Core	015_ox4_tp10	0.0218	50.6712	0.2038	42.6465	0.5251	3.3067	0.0336	0.0278	0.0588	0.0067	0.8168	0	98.2962		3.90479	39.1329	98.71	0.960065
Andesite	Core	015_ox4_tp11	0.0276	50.604	0.1981	42.6561	0.4599	3.2669	0.049	0.0341	0.0343	0	0.8019	0	98.0787		3.83805	39.2026	98.5164	0.96073
Andesite	Core	015_ox5_cr1	0	50.8624	0.195	42.9225	0.4414	3.1057	0	0.0147	0.0812	0	0.8561	0.0113	98.4504		3.50253	39.7709	98.8412	0.964375
Andesite	Core	015_ox5_cr2	0.0021	50.7832	0.186	43.001	0.4314	3.1527	0.0189	0.007	0.0514	0.147	0.8664	0.0104	98.6575		3.91913	39.4745	99.0502	0.960134
Andesite	Core	015_ox5_cr3	0.0008	50.8358	0.2765	43.1855	0.4306	3.112	0.0083	0.0101	0.0534	0.0655	0.8668	0	98.8421		3.89674	39.6792	99.2357	0.96047
Andesite	Rim	015_ox5_tp1	0.0233	49.9522	0.1604	43.77	0.4428	3.1127	0.0417	0.0271	0.0771	0.0428	0.837	0.0334	98.5206		5.44019	38.8749	99.0656	0.944679
Andesite	Rim	015_ox5_tp2	0.0026	50.44	0.1965	43.2743	0.4226	3.0696	0.0335	0.0351	0.0799	0	0.8961	0	98.3464		4.26736	39.4345	98.8778	0.956583
Andesite	Incl	015_ox7_1	0.0367	50.6096	0.2293	42.4654	0.4365	3.6969	0.0208	0.0137	0.0971	0	0.8835	0.0062	98.4569		4.39378	38.5118	98.9359	0.954919
Andesite	Incl	015_ox7_2	0.0405	50.5982	0.2159	42.3534	0.4134	3.574	0.0248	0.0192	0.1187	0.0588	0.8919	0.0194	98.3283		4.06957	38.6916	98.7359	0.958195
Andesite	Core	015_ox8_1	0.0214	51.1423	0.1944	42.3526	0.3951	3.5903	0.0298	0.0189	0.0541	0.0267	0.8689	0.0162	98.7107		3.53743	39.1696	99.0651	0.963864
Andesite	Core	015_ox8_2	0.0246	51.1186	0.1949	42.7201	0.454	3.627	0.031	0.0296	0.0672	0	0.8788	0.0084	99.1236		4.0798	39.0491	99.563	0.958482
Andesite	Core	015_ox8_3	0.0255	51.2314	0.1889	42.0627	0.436	3.6061	0.0124	0.0223	0.0922	0.0321	0.8628	0	98.5712		3.17858	39.2026	98.8909	0.967451
Andesite	Rim	015_ox8_rm2	0.0711	50.8702	0.1619	42.4844	0.4589	3.532	0.0481	0.0388	0.0579	0	0.8483	0.0097	98.5787		3.84606	39.0237	98.9666	0.960663
Andesite	Core	015_ox9_cr1	0	50.9858	0.2015	42.8609	0.4502	3.2715	0.0211	0.013	0.0583	0	0.8757	0.0175	98.7377		3.67911	39.5504	99.1241	0.96259
Andesite	Core	015_ox9_cr2	0.0032	51.0546	0.1934	42.7656	0.4646	3.3226	0	0.0123	0.0979	0.0134	0.835	0	98.7516		3.6007	39.5257	99.1234	0.963371
Andesite	Rim	015_ox9_rm1	0.0451	50.45	0.1926	42.2336	0.4814	3.5224	0.0293	0.0282	0.0999	0.0013	0.8347	0	97.916		4.00279	38.6319	98.3195	0.958764
Andesite	Rim	015_ox9_rm2	0.0272	50.6971	0.1987	42.9773	0.4348	3.4913	0.0345	0.0374	0.1049	0	0.8373	0	98.8166		4.49812	38.9299	99.2912	0.954172
Andesite	Rim	015_ox10_tp1	0.0143	51.1049	0.175	43.0022	0.4695	3.0427	0.0173	0.0194	0.0757	0.0508	0.8278	0.0126	98.8123		3.31096	40.023	99.1439	0.966438
Andesite	Rim	015_ox10_tp2	0.0062	51.0116	0.1955	43.3453	0.4161	2.9321	0.0058	0.0005	0.0709	0	0.8354	0.0065	98.7966		3.45089	40.2402	99.1716	0.96513
Andesite	Rim	015_ox10_tp3	0	50.9162	0.1768	42.9736	0.4462	2.9422	0.0222	0.0175	0.0563	0.0013	0.8112	0.0097	98.3699		3.21993	40.0763	98.6958	0.967293
Andesite	Core	015_ox10_tp5	0.0122	50.9164	0.1893	43.093	0.4209	3.0782	0.007	0.0239	0.0767	0.0575	0.8153	0.0016	98.692		3.61064	39.8441	99.0538	0.963367
Andesite	Core	015_ox10_tp6	0.0111	50.8881	0.1904	42.8206	0.4666	3.0653	0.0112	0.0029	0.043	0	0.8289	0.0256	98.3351		3.31312	39.8394	98.6856	0.966273
Andesite	Core	015_ox10_tp7	0.0152	51.0718	0.1879	42.8521	0.431	3.0893	0.0188	0.016	0.0571	0	0.8105	0.0062	98.5038		3.17732	39.9931	98.8742	0.967727
Andesite	Core	015_ox10_tp11	0.0097	50.9137	0.18	43.1646	0.4113	3.1422	0.0008	0.0169	0.0608	0	0.8328	0	98.6949		3.74698	39.793	99.1082	0.962012
Andesite	Core	015_ox10_tp12	0.0111	51.0798	0.182	42.8626	0.4793	3.2362	0.0142	0.0104	0.049	0.0414	0.8425	0	98.7936		3.56589	39.654	99.1658	0.963777
Andesite	Rim	015_ox10_tp15	0	51.0007	0.199	42.8527	0.4213	3.1567	0.0251	0.0223	0.0656	0.0588	0.8253	0.0065	98.6302		3.45853	39.7407	98.9805	0.96484
Andesite	Rim	015_ox10_tp17	0.001	50.8326	0.1945	42.7185	0.492	3.1229	0.0085	0.0112	0.0872	0.0883	0.8506	0.0156	98.423		3.49403	39.5745	98.773	0.964364
Andesite	Rim	015_ox11_tp1	0.0026	50.7647	0.1925	43.3502	0.4684	3.0348	0.0554	0.0132	0.0487	0	0.8303	0	98.6844		4.04089	39.7142	99.1657	0.959058
Andesite	Rim	015_ox11_tp2	0.0181	50.7789	0.1848	42.9356	0.4852	3.0822	0.0492	0.0131	0.0809	0	0.8464	0.013	98.4794		3.64931	39.6519	98.853	0.962855
Andesite	Core	015_ox12_cr1	0.0324	50.5695	0.1838	42.0328	0.4438	3.1861	0.0273	0.0138	0.0757	0	0.8539	0.0195	97.3771		2.96438	39.3654	97.7356	0.969447
Andesite	Core	015_ox12_cr2	0.0102	50.8697	0.2129	42.7362	0.4446	3.1175	0.0259	0	0.0655	0	0.8057	0.0052	98.2048		3.33849	39.7322	98.6279	0.965973
Andesite	Rim	015_ox12_rm1	0.4018	49.4789	0.224	42.2717	0.4534	2.9884	0.101	0.1075	0.0718	0.079	0.79	0	96.9624		3.63089	39.0046	97.3313	0.962273
Andesite	Rim	015_ox12_rm2	0.0789	50.656	0.2014	43.038	0.4888	3.0246	0.0254	0.0131	0.0698	0.0481	0.8076	0.0087	98.4605		3.70843	39.7011	98.832	0.962254
Andesite	Core	0202plug_tp2	0	50.3872	0.202	41.9085	0.4312	3.3641	0.0658	0.0076	0.1268	0	0.8388	0	97.2433		3.4448	38.8088	97.6771	0.964364
Andesite	Rim	0202plug_tp5	0.0099	50.477	0.2063	42.1657	0.4207	3.5759	0.0679	0.0107	0.0529	0	0.8901	0	97.8434		4.03846	38.5319	98.2817	0.958371
Andesite	NA	0202plug2_tp1	0	50.7194	0.1972	42.3731	0.4507	3.3541	0.0138	0.0012	0.0853	0.0589	0.8344	0	98.0856		3.6149	39.1204	98.4503	0.962931
Andesite	Core	0202plug2_cr1	0	50.7399	0.2023	42.453	0.4602	3.3255	0.022	0	0.0752	0	0.8277	0	98.0742		3.59114	39.2217	98.4656	0.963219
Andesite	Rim	0202plug2_rm1	0.0113	50.7752	0.2131	42.1565	0.4475	3.3051	0.0139	0.0098	0.0947	0	0.8171	0	97.8157		3.14507	39.3265	98.1593	0.967692
Andesite	Rim	0202plug2_rm2	0	50.2339	0.1979	42.0715	0.5	3.4888	0.0915	0.01	0.0794	0.0401	0.8362	0.0071	97.5561		4.17961	38.3107	97.9752	0.95676
Andesite	Rim	0202plug3_tp1	0	50.6305	0.1831	42.5431	0.4164	3.2192	0.0185	0.0084	0.0783	0	0.8281	0.0282	97.9113		3.53577	39.3616	98.3081	0.96379
Andesite	Rim	0202plug3_tp2	0.0035	50.7209	0.1984	42.5306	0.4388	3.3467	0	0.0056	0.0902	0	0.8163	0.0143	98.1341		3.67831	39.2208	98.5338	0.962353
Andesite	Core	0202plug3_cr1	0.0139	50.7893	0.1711	42.2295	0.4476	3.4573	0.0109	0.0031	0.0744	0.0535	0.8329	0	98.0739		3.55849	39.0275	98.44	0.963471
Andesite	Core	0202plug3_cr2	0.0005	50.5204	0.1702	42.0058	0.4607	3.2086	0.0728	0.014	0.0945	0	0.8292	0	97.3591		3.15423	39.1676	97.6927	0.967459
Andesite	Core	0202plug4_tp1	0.0194	50.583	0.207	42.5665	0.4632	3.1742	0.0433	0.0186	0.0996	0	0.8465	0.0088	97.9927		3.58233	39.3431	98.389	0.963306
Andesite	Core	0202plug4_tp2	0.1717	48.3892	0.1969	43.452	0.4178	2.7738	0.0901	0.0296	0.0949	0	0.8163	0	96.389		5.77957	38.2515	97.0114	0.940094
Andesite	Rim	0202plug4_rm1	0.0108	50.645	0.1818	42.2001	0.4366	2.9453	0.082	0.0179	0.0875	0	0.8724	0	97.4375		2.69628	39.774	97.7495	0.972292
Andesite	Rim	0202plug4_tp2	0.0032	50.4423	0.2029	42.6208	0.4239	3.2014	0.2142	0.0265	0.0701	0	0.8087	0	97.9404		4.05784	38.9695	98.4206	0.958391
Andesite	Core	0202plug6_cr1	0	50.6515	0.2067	42.0455	0.4471	3.1075	0.0236	0.0215	0.0804	0.0348	0.8728	0.0107	97.5018		2.81645	39.5112	97.7843	0.971002
Andesite	Rim	0202plug6_rm1	0	50.6904	0.2004	42.4799	0.5186	3.3064	0	0.0126	0.09	0.103	0.8675	0	98.254		3.76813	39.0893	98.6463	0.961395
Andesite	Core	0202plug7_cr1	0.0165	50.3987	0.1918	42.1984	0.4798	3.3133	0.0252	0.0078	0.0455	0.0268	0.856	0.0084	97.5683		3.65611	38.9086	97.9345	0.962312
Andesite	Rim	0202plug7_rm1	0	50.7142	0.17	42.3288	0.4509	3.2224	0.0118	0.0148	0.0486	0.1365	0.8404	0.0052	97.9398		3.38347	39.2843	98.2826	0.96529
Andesite	Core	0202plug8_cr1	0	50.5857	0.2029	42.5266	0.4778	3.3536	0.0034	0.0102	0.0946	0	0.8654	0.0006	98.068		3.87608	39.0389	98.5092	0.960269
Andesite	Rim	0202plug8_rm1	0.0082	50.1636	0.1871	42.0576	0.5215	3.2906	0.0157	0.0148	0.0607	0	0.8611	0.0172	97.1874		3.70784	38.7213	97.5696	0.961624
Andesite	NA	0202plug8_tp1	0.1613	49.2539	0.2604	43.3358	0.4239	3.048	0.1877	0.0251	0.0665	0.0214	0.8313	0	97.6115		5.50981	38.378	98.1673	0.943294
Andesite	Rim	0202plug8_rm1	0.0102	50.4859	0.2177	42.2416	0.4508	3.5806	0.0111	0.023	0.0817	0	0.8463	0	97.8832		4.07583	38.5741	98.3573	0.958027
Andesite	Rim	0202plug8_rm2	0.0004	50.3736	0.1882	42.0303	0.4303	3.4561	0.0239	0.0212	0.0808	0.1592	0.8121	0	97.5704		3.87099	38.5472	97.9639	0.959997
Andesite	Core	0202plug10_tp1	0.0441	47.8435	0.2883	42.334	0.3911	4.7907	0.0503	0.0186	0.074	0	0.8813	0	96.6554		9.16101	34.0908	97.6338	0.902852
Andesite	Core	0202plug10_tp2	0	50.8863	0.1913	42.4827	0.4714	3.3959	0.0632	0.0075	0.0773	0.004	0.8249	0.0178	98.419		3.69244	39.1602	98.7923	0.962245
Andesite	Rim	0202plug10_rm1	0	50.7176	0.1937	42.2125	0.4673	3.5297	0.0117	0.0247	0.0689	0.0509	0.8029	0.0003	98.0759		3.79394	38.7987	98.4603	0.961012
Andesite	Core	0202plug11_cr1	0.0035	50.6026	0.19	43.0479	0.4931	3.0054	0.0102	0.0154	0.0385	0	0.8529	0	98.2206		3.77099	39.6547	98.6373	0.961601
Andesite	Rim	0202plug11_rm1	0.0162	50.4437	0.1839	42.8313	0.4475	3.0513	0.0232	0.0154	0.0649	0.0094	0.8467	0.0182	97.9518		3.73959	39.4664	98.3264	0.961763
Andesite	Rim	0202plug12_tp1	0.0119	50.7807	0.1979	42.6173	0.407	3.1487	0.0084	0.022	0.0708	0	0.889	0	98.1012		3.28764	39.6591	98.4831	0.966416
Andesite	NA	0202plug12_tp3	0	50.2333	0.197	42.2614	0.4261	3.4099	0.0055	0.007	0.0784	0.0602	0.8239	0	97.4855		4.04904	38.618	97.9084	0.958214
Andesite	Core	0202plug12_cr1	0.0104	50.6211	0.1946	42.5665	0.5519	3.32	0.0076	0.0134	0.0727	0	0.8682	0.0101	98.1616		3.89404	39.0626	98.6266	0.960118
Andesite	Core	0202plug13_cr1	0.0038	50.5987	0.1997	42.6751	0.4304	3.1782	0.007	0.0242	0.0728	0.079	0.8642	0	98.1282		3.70487	39.3414	98.5043	0.962103
Andesite	Rim	0202plug13_rm1	0.0167	50.5703	0.2003	42.0851	0.4287	3.5603	0.0197	0.0181	0.0711	0.0187	0.8618	0	97.8243		3.77439	38.6889	98.229	0.961097
Andesite	Core	0202plug14_cr1	0.0059	50.8215	0.2046	42.406	0.475	3.392	0.0164	0.01	0.0589	0.0549	0.8796	0	98.3083		3.64376	39.1273	98.6899	0.962686
Andesite	NA	0202plug14_tp1	0.0015	50.6423	0.1933	42.359	0.4781	3.2629	0.0077	0.0286	0.0569	0	0.8623	0	97.8575		3.45802	39.2474	98.2391	0.964512
Andesite	Core	0202plug14_cr1	0.0168	51.1282	0.2282	42.4195	0.4303	3.1613	0	0.0211	0.0771	0.1365	0.8502	0.0156	98.4837		2.88703	39.8217	98.7741	0.970544
Andesite	Rim	0202plug14_rm1	0.0078	51.0667	0.2101	41.9748	0.42	3.2327	0.0288	0.0075	0.0697	0	0.8449	0	97.8432		2.50321	39.7224	98.1138	0.974313
Andesite	Core	0202plug16_tp1	0	50.7911	0.1814	42.6152	0.4565	3.3426	0.0274	0	0.0422	0	0.8383	0	98.2607		3.75761	39.2341	98.6712	0.961604
Andesite	Core	0202plug16_tp3	0.001	50.767	0.1969	42.6689	0.4654	3.1446	0.0292	0.0088	0.0786	0.0308	0.8432	0.0036	98.2381		3.49061	39.528	98.5877	0.964355
Andesite	Core	0202plug16_tp6	0.0019	50.634	0.1913	42.7662	0.443	3.0026	0.0289	0	0.0737	0	0.8358	0.0039	97.9464		3.39335	39.7128	98.3213	0.965348
Andesite	NA	0201plug1_tp1	0	50.4259	0.1821	42.4981	0.476	3.2244	0.0846	0.0102	0.0717	0.087	0.8597	0	97.8863		3.94715	38.9464	98.3152	0.959463
Andesite	Core	0201plug1_cr1	0.0104	50.115	0.3001	42.2562	0.4577	3.4365	0.0349	0.0172	0.0194	0.0442	0.8725	0	97.5477		4.26214	38.4211	97.9911	0.955955
Andesite	Core	0201plug2_cr1	0.0038	50.7044	0.1994	42.5495	0.4275	3.2376	0.0466	0.0076	0.0731	0.158	0.8576	0.0013	98.2664		3.70791	39.2131	98.6379	0.962052
Andesite	Rim	0201plug2_rm1	0	50.4036	0.185	42.4888	0.4479	3.3597	0.0211	0.0095	0.0631	0.0469	0.8689	0	97.8867		4.06576	38.8304	98.3019	0.958227
Andesite	Core	0201plug2_cr1	0	50.5803	0.1992	42.4575	0.4159	3.2272	0.0282	0.0122	0.088	0.0254	0.8925	0	97.9221		3.54484	39.2678	98.2816	0.963641
Andesite	Core	0201plug2_cr2	0.0066	50.7348	0.2228	42.5937	0.4276	3.3074	0.0074	0.0237	0.0602	0	0.8374	0.0178	98.2315		3.65049	39.309	98.6051	0.962672
Andesite	Rim	0201plug2_rm1	0	50.5157	0.1974	42.2694	0.4849	3.2119	0.0595	0.0322	0.0747	0.0375	0.8458	0.0188	97.7467		3.50417	39.1163	98.0989	0.963954
Andesite	Rim	0201plug2_rm2	0.0004	50.7767	0.1976	42.5931	0.4237	3.4574	0.0086	0.0046	0.0632	0.004	0.887	0.011	98.4274		3.91457	39.0707	98.8195	0.959979
Andesite	Core	0201plug4_cr1	0.007	50.6636	0.2039	42.4441	0.4249	3.3893	0.0272	0.02	0.0862	0.0455	0.8942	0	98.2015		3.78692	39.0366	98.5853	0.961175
Andesite	Rim	0201plug4_rm1	0.006	50.6292	0.1974	42.4339	0.4521	3.352	0.0151	0.0225	0.1035	0.0254	0.9144	0	98.1493		3.73108	39.0766	98.5253	0.961732
Phase 2	Core	021plug1_cr1	0.0076	49.1768	0.0923	47.2625	0.5167	0.5137	0.0015	0.0145	0	0.0013	0.2078	0	97.7561		4.95417	42.8047	98.2911	0.951275
Phase 2	Core	021plug1_cr2	0	49.1223	0.078	46.9052	0.5255	0.5093	0.0015	0.0193	0	0.0281	0.2066	0.012	97.4003		4.64915	42.7219	97.8736	0.95407
Phase 2	Core	021plug1_cr3	0.0015	49.1738	0.0806	47.3472	0.4746	0.4956	0.0165	0.0072	0	0	0.204	0.0133	97.7984		4.99624	42.8515	98.3149	0.950905
Phase 2	Rim	021plug1_rm1	0	49.3627	0.0849	47.1621	0.4815	0.5148	0.0072	0.0144	0	0.0548	0.2428	0	97.91		4.69	42.942	98.3951	0.953906
Phase 2	Rim	021plug1_rm2	0.003	49.5137	0.0851	47.2788	0.5125	0.4743	0.0054	0.017	0	0	0.2778	0.001	98.1282		4.56308	43.1729	98.6258	0.955278
Phase 2	Rim	021plug1_rm3	0	49.5043	0.0739	47.0342	0.5203	0.4558	0.0056	0.022	0.0129	0	0.226	0	97.6708		4.27705	43.1857	98.2835	0.957965
Phase 2	NA	021plug1_tp1	0.0024	49.0437	0.0684	47.5062	0.5202	0.5076	0.051	0.017	0	0.0361	0.2377	0	97.9827		5.46145	42.5919	98.5375	0.946357
Phase 2	NA	021plug1_tp2	0.0026	48.8848	0.0805	46.9899	0.5102	0.5605	0.0392	0.0164	0	0	0.2326	0.0042	97.224		5.08758	42.4121	97.8306	0.949667
Phase 2	Rim	021plug1_rm1	0.007	48.6557	0.087	47.1717	0.5229	0.5576	0.0058	0.0097	0	0.008	0.2882	0.0205	97.3231		5.48165	42.2393	97.8833	0.945754
Phase 2	Rim	021plug1_rm3	0.0054	49.7179	0.0709	47.2872	0.5376	0.5086	0.007	0.029	0.0136	0.099	0.3107	0.0039	98.5909		4.56068	43.1835	99.0477	0.955393
Phase 2	Core	021plug3_cr1	0	49.2025	0.0823	47.0519	0.5508	0.505	0	0.0105	0.0002	0.0281	0.2679	0.0032	97.6927		4.74983	42.778	98.1783	0.953188
Phase 2	Core	021plug3_cr2	0.0012	49.2638	0.087	47.5794	0.5287	0.5493	0.0002	0.0118	0.015	0.0909	0.2412	0	98.3378		5.39796	42.7223	98.9093	0.947137
Phase 2	Rim	021plug3_rm1	0.0247	48.5838	0.089	47.1775	0.5616	0.5554	0.0178	0.0207	0.0209	0	0.3613	0	97.209		5.5849	42.1522	97.9723	0.944696
Phase 2	Rim	021plug3_rm2	0.0189	48.3355	0.0796	46.9481	0.5132	0.5444	0.0073	0.0237	0	0.0321	0.3876	0	96.8791		5.52617	41.9756	97.4441	0.945004
Phase 2	Rim	021plug3_rm3	0.0131	48.8228	0.0808	46.8993	0.4941	0.539	0.0081	0.0072	0	0	0.4495	0	97.3042		4.92992	42.4633	97.8078	0.951149
Phase 2	Core	021plug3_cr1	0	49.2092	0.0829	47.2358	0.4851	0.5034	0.0042	0.0147	0.0324	0	0.2294	0.0153	97.7588		4.8488	42.8728	98.2982	0.952313
Phase 2	Core	021plug4_cr1	0	49.0441	0.0788	46.9078	0.5024	0.4922	0.0172	0.0173	0	0.1604	0.2569	0.0081	97.4598		4.82248	42.5685	97.9684	0.952322
Phase 2	Core	021plug4_cr2	0.0113	49.2011	0.079	47.3406	0.5092	0.4909	0	0.0104	0	0.0441	0.2625	0	97.9307		4.998	42.8434	98.4499	0.950897
Phase 2	Core	021plug4_cr3	0.0085	49.0642	0.0856	46.952	0.5759	0.5225	0.014	0.0084	0.0054	0.0588	0.2424	0.0036	97.5414		4.87874	42.5621	98.0301	0.951798
Phase 2	Rim	021plug4_rm2	0	48.776	0.08	46.5708	0.5316	0.5875	0.0086	0.0125	0.0224	0.0254	0.4595	0	97.0486		4.79296	42.2581	97.5545	0.95231
Phase 2	Core	021plug6_cr1	0.0062	49.1882	0.0692	47.1126	0.508	0.5109	0.0062	0.0144	0	0.0762	0.2137	0	97.6722		4.84287	42.7549	98.1908	0.952296
Phase 2	Core	021plug6_cr2	0.0006	49.3151	0.0875	47.3282	0.5498	0.5304	0.01	0.0183	0	0	0.2196	0.0308	98.0394		4.97939	42.8477	98.5892	0.951127
Phase 2	Rim	021plug6_rm1	0.0197	48.8588	0.108	46.6237	0.5467	0.4981	0.0107	0.0162	0	0.02	0.2414	0	96.9373		4.58038	42.5022	97.4022	0.954491
Phase 2	Rim	021plug6_rm2	0.0067	49.3759	0.0835	46.9605	0.4628	0.4816	0.0368	0.0208	0	0	0.2474	0.0295	97.6435		4.34542	43.0505	98.1409	0.957205
Phase 2	Rim	021plug6_rm3	0.4843	48.8578	0.107	46.4183	0.5192	0.5819	0.0315	0.0186	0	0.115	0.2985	0	97.4179		3.99358	42.8248	97.8322	0.960232
Phase 2	Core	021plug9_cr1	0	49.1826	0.0936	47.5543	0.4956	0.4984	0.0118	0.0154	0	0.0174	0.2209	0.0049	98.0855		5.25916	42.8221	98.6218	0.948442
Phase 2	Core	021plug9_cr2	0	49.1153	0.0848	47.6407	0.538	0.5096	0.0002	0.0106	0.0112	0	0.2405	0.001	98.1378		5.45879	42.7288	98.6988	0.9465
Phase 2	Rim	021plug9_rm2	0	48.3279	0.093	46.8589	0.5668	0.6178	0.0158	0.0146	0	0	0.3689	0	96.8318		5.6461	41.7785	97.4294	0.943749
Magnetite
Rock Type	Spot	Comment	SiO2	TiO2	Al2O3	FeO	MnO	MgO	CaO	K2O	Cr2O3	ZnO	V2O3	NiO	Total		Fe2O3*	FeO*	Total*	%Usp*
Plinian	NA	009plug1_tp1	0.0344	4.9798	2.8302	82.3684	0.9358	1.2585	0.0035	0.0196	0	0.2462	0.0508	0	92.704		55.3608	32.5543	98.2739	0.144791
Plinian	Core	009plug1_cr1	0.0422	5.3385	3.0993	82.5318	0.8777	1.2995	0	0.0096	0	0.2369	0.0617	0.0043	93.4607		54.8467	33.1803	98.9967	0.155581
Plinian	Core	009plug2_cr1	0.02	4.4567	2.387	83.7955	0.822	1.1519	0.0011	0.0079	0.0066	0.087	0.1767	0.0324	92.9449		56.9927	32.513	98.655	0.12882
Plinian	Rim	009plug2_rm2	0.0195	4.3777	2.0416	83.0729	0.8315	0.9362	0.0011	0.0183	0.0218	0.3089	0.1408	0.0095	91.7798		56.6186	32.127	97.4525	0.127606
Plinian	Rim	009plug2_rm3	0.0243	4.4318	2.0186	82.5501	0.9209	0.9788	0	0.0247	0.0303	0.2382	0.1673	0.0304	91.4118		56.2264	31.9571	97.0488	0.129312
Plinian	Core	009plug2_cr2	0.0317	4.4385	2.4241	83.5842	0.8678	1.2331	0	0.0001	0	0.1835	0.1748	0	92.9125		57.027	32.2709	98.6514	0.127502
Plinian	Core	009plug3_1	0.0259	3.7005	2.4502	83.2662	0.8116	1.2377	0.0025	0.0248	0.8124	0.2262	0.1059	0.0095	92.6735		57.5059	31.5219	98.435	0.108282
Plinian	Core	009plug4_tp1	0.0429	6.8745	3.7262	79.5116	0.6997	1.9553	0.005	0.0191	0	0.1957	0.0884	0.0334	93.1432		50.9339	33.6808	98.2549	0.201483
Plinian	Rim	009plug4_rm1	0.0524	6.8597	4.1915	77.8751	0.6805	2.2193	0.0117	0.0376	0.0002	0.0724	0.1323	0	92.1285		49.7257	33.1315	97.1148	0.20467
Plinian	Rim	009plug4_rm2	0.0409	7.0641	4.1758	78.5801	0.6313	2.2498	0	0.0293	0.0308	0	0.1493	0	92.8862		49.9323	33.6506	97.9542	0.209414
Plinian	Core	009plug5_cr2	0.0393	5.8173	2.94	81.6962	0.8063	1.4005	0	0.0196	0	0.2105	0.0956	0.0452	93.0351		53.7282	33.3511	98.4536	0.169495
Plinian	Rim	009plug5_rm1	0.0431	5.7936	3.1695	80.152	0.7565	1.5776	0.0005	0.0246	0.0186	0.1112	0.1226	0.016	91.7859		52.6051	32.8175	97.0564	0.171714
Rhyolite	NA	021plug5_tp4	0.085	16.6758	1.9465	74.4594	0.3109	0.2472	0	0.0114	0.0126	0.1537	1.394	0.0258	95.3178		31.9325	45.7263	98.5217	0.517543
Rhyolite	NA	021plug5_tp5	0.0874	16.6633	1.9738	74.2295	0.3386	0.2575	0.0162	0.0143	0	0.2244	1.3676	0.0209	95.1647		31.8701	45.5525	98.3866	0.517288
Rhyolite	NA	021plug5_tp6	0.0826	16.4839	1.9591	74.6653	0.3619	0.2424	0.007	0.014	0.019	0.3581	1.3422	0	95.5322		32.5269	45.3973	98.7944	0.508779
*Recalculatiof Stormer (1983)
Standards
	No.	CaO	K2O	Al2O3	MgO	SiO2	MnO	ZnO	FeO	Cr2O3	NiO	TiO2	V2O3	Total
MAGT	1	0.0041	0.0025	0.0389	0.0939	0.0625	0.1094	0.0379	90.8082	0.2281	0.0331	0.1092	0.2688	91.7966
MAGT	2	0.0119	0.0172	0.0264	0.104	0.0451	0.1067	0.0122	91.1371	0.2043	0.0265	0.1227	0.2661	92.0803
MAGT	3	0.0265	0.0158	0.0293	0.0718	0.0398	0.0976	0.0866	91.1107	0.2314	0.0332	0.1329	0.2681	92.1438
MAGT1_1	89	-0.0043	0.0061	0.0147	0.0754	0.043	0.1225	0.044	91.4514	0.1892	0.0324	0.2012	0.2708	92.4465
MAGT1_2	90	0.0019	0.0075	0.0207	0.0863	0.0645	0.0979	-0.0427	90.4917	0.241	0.0288	0.1214	0.2561	91.3752
MAGT1_3	91	0.0047	0.0066	0.0143	0.0971	0.0403	0.0789	-0.096	90.6753	0.1873	0.0114	0.1324	0.2798	91.4322
MAGT2_1	170	0.015	0.0064	0.0383	0.0712	0.0594	0.1153	-0.028	90.6163	0.2125	0.0282	0.0902	0.268	91.4929
MAGT2_3	172	0.0261	0.0162	0.037	0.0868	0.0496	0.0881	-0.016	90.8522	0.2308	0.0259	0.1157	0.2555	91.768
MAGT3_3	245	0.0071	0.022	0.0353	0.077	0.079	0.1343	-0.0561	90.8708	0.2107	0.0121	0.1012	0.2605	91.7539
MAGT3_4	246	0.011	0.0075	0.0301	0.0794	0.0575	0.1062	0.0988	90.7147	0.1958	-0.0007	0.1232	0.259	91.6826
MAGT3_5	247	0.0304	0.0032	0.0182	0.0726	0.053	0.1171	0.0467	90.4465	0.1689	0.0157	0.1324	0.2552	91.36
	Average	0.0122182	0.0100909	0.0275636	0.0832273	0.0539727	0.106727	0.00794545	90.8341	0.209091	0.0224182	0.125682	0.264355	91.7575
	2 Sigma	0.0224901	0.0130008	0.0187581	0.0224761	0.0241562	0.0314967	0.122467	0.602031	0.0449361	0.0222744	0.0569504	0.0155449
ILMN	10	0.0219	0.0079	0.0024	0.2596	0.0072	4.433	0.0582	45.469	-0.0035	0.0007	45.8456	0.1614	96.2635
ILMN	11	0.0147	0.0103	-0.0031	0.2885	0.0032	4.2918	0.0393	45.9303	-0.0199	-0.0253	45.7991	0.1328	96.4618
ILMN	12	0.0197	0.0205	0.0104	0.2811	0.0097	4.6086	0.0609	46.0319	-0.01	0.0016	45.9445	0.1428	97.1217
ILMN_1_1	92	0.0181	0.0104	0.0156	0.3032	0.0023	4.5947	0.1281	45.9478	0.0008	-0.022	45.7469	0.0987	96.8447
ILMN_1_2	93	0.0171	0.0178	0.0172	0.2872	0.0097	4.3581	0.1347	46.7427	0.0019	-0.0146	44.8021	0.1242	96.4982
ILMN2_1	173	0.0127	0.0134	0.0198	0.3176	0.0099	4.6251	-0.0347	46.1343	0.0164	-0.0156	45.9101	0.1267	97.1358
ILMN2_2	174	0.0133	0.0229	0.0145	0.2721	0.0094	4.4413	0.0695	47.1857	0.0367	-0.0003	44.2744	0.1344	96.4739
ILMN2_3	175	0.0118	0.0077	0.0077	0.3075	0.0048	4.5398	-0.0468	45.7462	0.0208	0.0062	45.9409	0.1458	96.6925
ILMN3_1	248	0.0089	0.0139	0.0137	0.3007	0.0138	4.6079	0.1121	45.5673	0.016	-0.0211	45.7835	0.1792	96.596
ILMN3_2	249	0.0042	0.017	0.0053	0.285	0.0029	4.6169	-0.0614	45.4996	0.0118	-0.0149	45.9123	0.2166	96.4954
ILMN3_3	250	0.0245	0.0058	0.0108	0.2942	-0.0002	4.5961	0.1094	45.6935	0.0038	-0.0026	45.8739	0.1248	96.7341
	Average	0.0151727	0.0134182	0.0103909	0.290609	0.00660909	4.51939	0.0517545	45.9953	0.0068	-0.00980909	45.6212	0.144309	96.6652
	2 Sigma	0.0117644	0.0111774	0.0136974	0.0330404	0.00856432	0.236492	0.141788	1.06992	0.0313818	0.022251	1.10413	0.0637051

## Sheet: S6. Fayalite
Raw Analyses														Ol. Components
No.	Comment	CaO	TiO2	SiO2	Al2O3	MgO	P2O5	FeO	NiO	Cr2O3	MnO	Total		Fo	Fa	Tp
53	83070fay1_core2	0.0718	-0.0201	30.0953	-0.0026	3.5857	0.0432	64.5809	-0.0345	-0.0052	1.3757	99.6903		0.0883394	0.892407	0.0192539
54	83070fay1_core2	0.0513	-0.0139	30.0309	-0.0038	3.5308	0.0371	65.1217	-0.016	-0.017	1.3063	100.027		0.0865412	0.89527	0.0181889
55	83070fay1_core3	0.059	0.0298	30.0749	0.0063	3.5175	-0.0147	65.0893	-0.0628	-0.0266	1.3554	100.028		0.0862228	0.894903	0.0188742
56	83070fay1_core4	0.0673	0.0333	30.1824	-0.0045	3.4994	0.0622	64.4746	-0.0566	0	1.3241	99.5822		0.0865871	0.894801	0.018612
57	83070fay1_core5	0.0888	0.0104	30.0321	-0.0127	3.5745	0.0604	64.8997	-0.0086	-0.0141	1.2734	99.904		0.0878265	0.894399	0.0177742
58	83070fay1_rim1	0.0535	-0.0145	29.891	-0.0037	3.5292	-0.1062	64.6693	0.0332	0.0052	1.4321	99.4892		0.0868936	0.893076	0.0200308
59	83070fay1_rim2	0.0913	0.0535	31.1419	-0.0219	3.7359	-0.0312	62.0837	0.0123	0.0052	1.3419	98.4127		0.0950118	0.885601	0.0193873
61	83070fay1_rim4	0.0752	0.0076	31.111	0.182	3.4638	-0.0139	62.7729	0.0493	0.0015	1.2092	98.8587		0.0880042	0.894543	0.0174527
62	83070fay1_rim5	0.1028	0.0646	30.2481	0.0084	3.5795	-0.019	62.9907	-0.0062	-0.0201	1.335	98.2838		0.0902347	0.890647	0.0191182
63	83070fay2_core1	0.0723	0.0139	29.9601	-0.0138	3.576	-0.025	64.9949	-0.0369	-0.0377	1.3388	99.8427		0.0876651	0.89369	0.0186449
65	83070fay2_core3	0.0768	0.0333	30.3901	-0.0225	3.4453	-0.0398	64.0305	0.0246	-0.0111	1.3137	99.241		0.0859055	0.895486	0.0186082
66	83070fay2_core4	0.0635	0.0437	29.9247	0.0055	3.5551	-0.0277	64.2852	-0.0086	-0.0074	1.3518	99.1859		0.0880411	0.892941	0.0190178
69	83070fay2_rim2	0.0829	-0.0139	30.0387	-0.0053	3.8027	-0.0139	64.1248	-0.0765	-0.0141	1.3602	99.2857		0.0937956	0.887145	0.0190593
70	83070fay2_rim3	0.0846	0.0403	30.0313	-0.0052	3.8148	-0.0571	63.8575	0.037	0.0097	1.3909	99.2039		0.0943743	0.886078	0.0195475
71	83070fay2_rim4	0.0934	0.0368	29.8325	0.0031	3.6603	0.0311	64.2446	0.0123	-0.0163	1.314	99.2119		0.0905097	0.891032	0.0184581
73	CH12021fay1_core1	0.0785	0.0049	30.1354	0.0041	3.5518	-0.0035	64.4701	-0.0629	-0.0141	1.3121	99.4765		0.0877901	0.893786	0.0184237
74	CH12021fay1_core2	0.0846	0.016	30.3278	-0.0056	3.5671	0.0675	63.7838	-0.0185	-0.0134	1.3041	99.1135		0.0889913	0.892526	0.0184823
75	CH12021fay1_core3	0.0935	0.0341	30.3836	0.0107	3.515	-0.052	64.1993	0.0568	0.0067	1.3576	99.6054		0.0872316	0.893629	0.0191397
76	CH12021fay1_core4	0.1488	0.0132	30.4325	-0.0005	3.5575	0.0502	64.4057	-0.0481	0.0186	1.2847	99.8627		0.088031	0.893909	0.0180595
77	CH12021fay1_core5	0.0774	0.0264	30.1738	-0.0114	3.5138	0.0355	64.3406	0.0259	-0.0267	1.3746	99.53		0.0870124	0.89365	0.0193372
78	CH12021fay1_rim1	0.0903	0.0132	31.7036	0.0222	3.9266	0.0382	64.3887	0.0173	0.006	1.3594	101.565		0.0962075	0.884871	0.0189214
81	CH12021fay1_rim4	0.0934	0.0167	30.3583	-0.011	3.5348	0.0571	63.7616	-0.0123	-0.0156	1.2649	99.048		0.0883332	0.89371	0.0179568
82	CH12021fay1_rim5	0.1002	-0.0174	30.8303	0.1302	3.5148	-0.0156	63.8103	-0.0321	-0.0067	1.3119	99.626		0.0877588	0.893633	0.0186082
Standards
Fo83.	-0.013	0.0198	39.0424	-0.0023	42.7812	0.0261	16.3953	0.0536	0.007	0.3104	98.6206
Fo83.	0.0199	0.0091	39.3809	-0.008	42.9161	0.0482	16.8523	0.0634	0.0226	0.3461	99.6507
Fo83.	-0.0211	-0.0151	39.2748	0.0125	43.0531	-0.0982	16.5512	-0.0431	0.0191	0.363	99.0963
Fo83.	-0.013	0.0198	39.0583	-0.0023	43.024	0.0261	16.3872	0.0535	0.007	0.3108	98.8715
Fo83.	0.0199	0.0091	39.3969	-0.008	43.1596	0.0481	16.8441	0.0633	0.0225	0.3465	99.9021
Fo83.	-0.0211	-0.0151	39.2909	0.0126	43.2975	-0.0982	16.543	-0.043	0.0191	0.3634	99.3492
Fo83.	-0.0082	0.0136	39.5105	-0.0002	43.5375	0.0556	16.403	0.0076	0.0365	0.3603	99.9163
Fo83.	-0.0035	0.0333	39.2694	0.0044	43.3245	0.0648	16.5446	-0.0431	0.0591	0.3058	99.5593
Fo83.	0.0059	0.0061	39.5078	0.0032	43.6478	0.0538	16.7191	0.0178	0.0417	0.3115	100.315
Avg	-0.0038	0.00895556	39.3035	0.00132222	43.1935	0.0140333	16.5822	0.0144444	0.0260667	0.335311	99.4756
2 SD	0.0316605	0.0317408	0.338927	0.0152888	0.569752	0.129804	0.366925	0.0944	0.0338625	0.050403
Monitored
Fayalite_1.1	0.036	0.0519	29.1077	-0.0195	0.0437	-0.0051	68.3575	-0.0928	0.0073	2.0162	99.503
Fayalite_1.2	0.0371	0.0725	29.1724	-0.0042	0.0821	-0.029	68.7329	-0.0684	-0.0189	2.0658	100.042
Fayalite_1.3	0.0415	0.0424	28.9591	-0.0162	0.0431	0.0256	69.0101	0	0.0058	2.1097	100.221
Fayalite_2.1	0.0426	0.0055	28.9988	-0.0044	0.0439	0.0393	68.9714	-0.1002	-0.0668	2.0177	99.9479
Fayalite_2.2	0.0207	0.0533	28.7614	-0.0141	0.0308	-0.1008	67.8649	-0.0244	-0.0015	2.0874	98.6777
Fayalite_2.3	0.0415	-0.0082	28.8063	-0.0116	0.0693	-0.0068	68.2113	0.0171	-0.0145	2.0808	99.1853
Fayalite_3.1	0.0492	0.0287	29.0591	-0.005	0.078	0.0017	67.7173	-0.0293	0.0116	2.2224	99.1338
Fayalite_3.2	0.0863	0.0205	29.2013	-0.0044	0.0747	0.0598	68.32	0.0269	0.0073	2.0712	99.8636
Fayalite_3.3	0.047	0.015	28.8999	0.0142	0.092	0.1041	68.4254	-0.0122	0.0116	2.2243	99.8213

## Sheet: S7. Biotite
Raw Analyses
No.	CaO	K2O	SiO2	Al2O3	MgO	Na2O	FeO	MnO	Cr2O3	TiO2	Cl	Total	Comment
4	-0.0096	9.0166	33.4191	14.2886	4.2256	0.5466	29.2194	0.1866	-0.0039	5.288	0.2655	96.3827	CH12021_bio1.1	core
5	0.0182	9.0696	33.43	14.2118	4.2862	0.5701	29.4414	0.1625	-0.001	5.2854	0.265	96.6795	CH12021_bio1.2	core
6	0.0153	9.1184	33.7218	14.2612	4.2367	0.6276	29.5018	0.1466	0.0512	5.2721	0.2696	97.1616	CH12021_bio1.3	core
7	0.0078	9.1459	33.7961	14.4242	4.1994	0.5778	29.2818	0.1577	-0.0059	5.2606	0.257	97.0445	CH12021_bio1.4	rim
8	0.0181	9.0709	33.3948	14.3378	4.2721	0.5445	29.0793	0.1321	0.0413	5.2388	0.2448	96.3194	CH12021_bio1.5	rim
9	0.0242	8.9789	33.9092	14.165	4.1831	0.5646	29.2123	0.2199	0.0393	5.337	0.2622	96.8366	CH12021_bio2.1	core
10	0.0452	9.0065	33.6434	14.1329	4.1666	0.5431	29.5068	0.1515	0.0373	5.3233	0.2495	96.7498	CH12021_bio2.2	rim
11	0.0185	8.9559	33.4388	14.2352	4.2996	0.6015	29.372	0.1605	-0.0255	5.2836	0.2615	96.5427	CH12021_bio2.3	core
12	0.0437	8.915	33.6031	14.2363	4.173	0.588	29.7929	0.1439	-0.001	5.3481	0.2554	97.0409	CH12021_bio2.4	rim
13	0.0515	8.9031	33.6305	14.148	4.279	0.603	29.8135	0.1432	0.0216	5.3363	0.2574	97.1291	CH12021_bio3.1	core
14	0.0053	8.9835	33.8381	14.2861	4.2881	0.6234	29.7588	0.1365	0.0069	5.3559	0.2556	97.4805	CH12021_bio3.2	core
15	0.0396	8.9816	33.6347	14.1583	4.2122	0.5345	29.348	0.1537	0.0108	5.2566	0.2428	96.5181	CH12021_bio3.3	rim
16	0.0424	8.9169	33.3728	14.1374	4.2525	0.5871	29.2442	0.141	0.001	5.3202	0.249	96.2084	CH12021_bio3.4	rim
17	0.0117	9.1985	33.4235	14.0507	4.2706	0.5688	29.4244	0.1569	-0.0098	5.2542	0.2554	96.5473	CH12021_bio3.5	rim
18	-0.0029	9.0525	33.6615	14.154	4.1969	0.5606	29.5598	0.1695	-0.0187	5.3076	0.2443	96.8301	CH12021_bio5.1	core
19	0.0443	9.1422	33.4138	14.2467	4.2196	0.5445	30.0534	0.1575	0.0157	5.2691	0.2582	97.3068	CH12021_bio5.2	core
20	0.0658	8.9056	33.3991	13.9765	4.1688	0.5552	28.4106	0.1554	0.001	5.2516	0.2469	95.0809	CH12021_bio5.3	rim
21	0.0519	8.9742	33.6244	14.118	4.268	0.58	28.988	0.1794	0.0256	5.2915	0.2536	96.2975	CH12021_bio5.4	rim
22	0.0307	8.9999	33.9255	14.4784	4.261	0.5301	29.1639	0.1411	0.0138	5.2491	0.2548	96.9909	CH12021_bio5.5	rim
23	0.0243	9.0179	33.6469	14.1125	4.2208	0.5406	29.2927	0.1291	0.0108	5.3382	0.2467	96.5248	CH12021_bio5.6	core
24	0.0256	9.0556	33.7483	14.3455	4.2493	0.4923	29.2666	0.1568	0.0088	5.2266	0.2484	96.7677	CH12021_bio6.1	core
25	0.0371	9.0438	33.6181	14.2088	4.1679	0.5744	29.427	0.1531	0.0305	5.2593	0.2698	96.729	CH12021_bio6.2	core
26	0.027	9.132	33.6467	14.17	4.1897	0.5397	29.3416	0.1299	-0.0108	5.2758	0.265	96.6469	CH12021_bio6.3	core
27	0.0147	9.0865	33.8167	14.2375	4.1363	0.5972	29.6863	0.1577	-0.0078	5.314	0.2577	97.2387	CH12021_bio8.1	core
28	0.0179	9.051	33.847	14.2904	4.2366	0.5954	29.5842	0.1297	0.0078	5.3084	0.2402	97.2544	CH12021_bio8.2	core
29	-0.003	9.0619	33.5422	14.1763	4.0935	0.5743	29.7156	0.1884	-0.0088	5.2956	0.257	96.8351	CH12021_bio8.3	core
30	0.1105	8.8834	33.4151	14.1431	4.1437	0.5511	28.9219	0.1675	-0.0049	5.2129	0.2788	95.7603	CH12021_bio8.4	rim
31	0.0143	9.0636	34.0295	14.4625	4.5042	0.5239	29.7913	0.174	0.0399	4.5527	0.2631	97.3596	CH12021_bio8.5	rim
32	0.0466	9.1586	33.7927	14.1754	4.3403	0.5898	29.6292	0.1204	-0.0156	5.1503	0.3005	97.2205	CH12021_bio8.6	rim
33	0.025	9.0237	33.9447	14.2078	4.2087	0.5698	29.3849	0.162	-0.0107	5.2212	0.2518	96.9322	83070_bio1.1	core
34	0.0385	8.8904	33.5324	14.2507	4.1853	0.5609	29.5214	0.1434	0.0195	5.3243	0.2498	96.6603	83070_bio1.2	core
35	0.0254	9.0742	33.783	14.2994	4.2626	0.5593	29.2502	0.1604	-0.0019	5.2616	0.2513	96.8688	83070_bio1.3	rim
36	0.0338	9.0796	33.8649	14.2678	4.2142	0.5376	29.3114	0.127	-0.001	5.2917	0.2561	96.9254	83070_bio1.4	rim
37	0.0284	9.0091	33.6569	14.3018	4.1487	0.6294	29.5919	0.1583	0.0312	5.3502	0.2507	97.1	83070_bio2.1	core
38	0.0187	9.1371	33.8058	14.4819	4.2658	0.5727	29.6383	0.1569	-0.0019	5.3211	0.2388	97.5814	83070_bio2.2	core
39	0.0104	9.1508	33.7144	14.3872	4.1782	0.5831	29.4776	0.1457	-0.0302	5.3564	0.2558	97.1718	83070_bio2.3	core
40	-0.0048	8.9125	33.6391	14.4001	4.2388	0.6036	29.5371	0.162	0.0409	5.3528	0.2621	97.0852	83070_bio2.4	rim
41	0.0436	9.0734	33.3083	14.1737	4.1898	0.572	29.3125	0.1478	0.0409	5.2722	0.2545	96.3313	83070_bio2.5	rim
42	0.0277	9.1162	32.7702	13.8019	4.0737	0.6127	28.8565	0.1746	-0.001	5.3311	0.2624	94.9669	83070_bio2.6	rim
43	0.0627	9.091	33.2263	14.1791	4.1906	0.5858	29.0895	0.1537	0.0273	5.3214	0.2541	96.1243	83070_bio2.7	rim
Standard
No.	CaO	K2O	SiO2	Al2O3	MgO	Na2O	FeO	MnO	Cr2O3	TiO2	Cl	Total	Comment
1	9.27	2.1488	40.76	14.776	13.3009	3.547	10.6325	0.0308	0.0334	4.8309	0.0273	99.3514	KHOR
2	10.0831	2.1802	40.6263	14.5429	13.3935	3.5593	10.6233	0.0092	0.0042	4.8465	0.0195	99.8837	KHOR
3	9.9412	2.1474	40.7012	14.6648	13.4667	3.6454	10.6736	0.0523	0.0418	4.827	0.0258	100.181	KHOR
Avg	9.76477	2.1588	40.6958	14.6612	13.387	3.5839	10.6431	0.0307667	0.0264667	4.8348	0.0242	99.8055
2 Sigma	0.86863	0.0370923	0.134023	0.233182	0.166178	0.107229	0.0535658	0.0431	0.0394712	0.0206369	0.00827768	0.840979

## Sheet: S8. Isotopic Models
Fig. 7 Model
	Sample	87Sr/86Sr	143Nd/144Nd	[Sr]	[Nd]			F	87/86 result^	143/144 result^	1/Sr
Sierra de Moreno*		0.719532	0.512087	115.53	36.63			1	0.7033	0.513	0.00190808
Mantle Values'		0.7033	0.513	711	13			0.9	0.703739	0.512706	0.00207006
								0.8	0.704285	0.512524	0.00226209
								0.7	0.704974	0.512402	0.00249339
			r	0.6				0.6	0.705859	0.512314	0.00277737
			zsr	-1.5				0.5	0.707018	0.512248	0.00313437
			Dsr	1				0.4	0.708563	0.512198	0.00359667
			Dnd	0.9				0.3	0.710645	0.512158	0.00421894
			znd	-1.25				0.2	0.713416	0.512127	0.00510159
								0.1	0.716816	0.512103	0.00645125
								0	0.719532	0.512087	0.00877193
*Compositions for Sierra de Moreno taken from Lucassen et al. (2001)
^Equation 15b of DePaolo (1981)
'Sr compositions from van Alderwerelt et al. (2021). Nd compositions from Mamani et al. (2010)
Supplementary Figure
	Sample	87Sr/86Sr	[Sr]					F	87Sr/86Sr result^	[Sr] mix
Sierra de Moreno*		0.713811	114		r	0.05		1	0.711168	524.087
Caspana	CH19C006	0.711168	524.087		zsr	-1.42105		0.9	0.711171	483.078
					Dsr	2.3		0.8	0.711176	442.07
								0.7	0.711182	401.061
								0.6	0.711191	360.052
								0.5	0.711203	319.044
								0.4	0.711224	278.035
								0.3	0.711261	237.026
								0.2	0.711344	196.017
								0.1	0.711616	155.009
								0	0.713811	114
*Compositions for Sierra de Moreno taken from Lucassen et al. (2001)
^Equation 15b of DePaolo (1981)
Aitcheson and Forrest Models
All models below from Aitcheson and Forrest (1994)
		Sample	87Sr/86Sr	143Nd/144Nd	206Pb/204Pb	[Sr]	[Nd]	[Pb]
Assimilant	Sierra de Moreno*		0.719532	0.512128	19.781	115.53	36.63	12.3
Parent^			0.7033	0.513	18.221	711	13	4
Daughter	Caspana	CH19C006	0.711168	0.51214	18.745	524.087	23.8	14
Sr				r
				0.1	0.2	0.3	0.4	0.5	0.6	0.7	0.8	0.9
			Eqn 5	0.111111	0.249882	0.423661	0.628981	0.852709	1.08165	1.30655	1.52198	1.72526
	lambda	0.940698
	gamma	0.162489
	Dsr	1
			Eqn 6	0.107367	0.1946	0.250631	0.28779	0.313891	0.333137	0.347881	0.359524	0.368944
			Eqn 7	0.111093	0.244797	0.383797	0.510613	0.620182	0.713301	0.79236	0.859824	0.917816
Nd				r
				0.1	0.2	0.3	0.4	0.5	0.6	0.7	0.8	0.9
			Eqn 5	#NUM!	0.25	0.428569	0.665913	0.984877	1.39573	1.88978	2.44742	3.04693
	lambda	71.6667
	gamma	2.81769
	D Nd	0.85
		.
			Eqn 6	0.0978187	0.18516	0.258065	0.318137	0.367855	0.40941	0.444531	0.474535	0.500427
			Eqn 7	-6.64335e+27	0.25	0.428571	0.66657	0.994798	1.44311	2.02004	2.7113	3.49088
206 Pb				r
				0.1	0.2	0.3	0.4	0.5	0.6	0.7	0.8	0.9
			Eqn 5	0.101169	0.132561	0.143158	0.148474	#DIV/0!	0.153802	0.155326	0.156469	0.157359
	lambda	0.505792
	gamma	3.075
	D Pb	0.5
		.
			Eqn 6	0.0958062	0.199345	0.310531	0.429488	#DIV/0!	0.691883	0.836186	0.989974	1.15394
			Eqn 7	0.0944549	0.223629	0.406186	0.662439	#DIV/0!	-42.2829	-5.93526	-3.01879	-2.11267
*Compositions for Sierra de Moreno taken from Lucassen et al. (2001)
'Sr compositions from van Alderwerelt et al. (2021). Nd and Pb compositions from Mamani et al. (2010)

## Sheet: S9. MCS Models
D Values
	Opx	Spinel	Feldspar	Rhm-Oxide	Cpx	Qtz	Ol
Sc	4.3/1110/26/740	2.5/1110/10.65/740	0.01/1110/0.466/740	10/1110/18.5/740	17/1110/17/740	1e-06	8.65
V	1.335/1110/5.8/740	31.35/1110/63/740	0.27/1110/0.281/740	72/1110/72/725	3.15/1110/8.25/725	1e-06	1e-07
Rb	0.01/1110/0.005/740	0.15/1110/0.05/740	0.16/1110/0.02/740	0.01/1110/0.05/740	0.07/1110/0.01/740	1e-06	1e-07
Sr	0.01/1110/0.008/740	0.11/1110/0.01/740	2.2/1110/6/740	0.01/1110/0.415/740	0.28/1110/0.25/740	1e-06	1e-07
Y	0.46/1110/0.4/740	0.64/1110/0.09/740	0.066/1110/0.07/740	0.00045/1110/0.09/740	2.4/1110/4.8/740	1e-06	1e-07
Nb	0.78/1110/0.005/740	0.11/1110/1.2/740	0.0265/1110/0.01/740	4.6/1110/1.2/740	2.1/1110/0.009/740	1e-06	1e-07
Ba	0.1/1110/0.005/740	0.26/1110/0.005/740	0.27/1110/0.5/740	0.01/1110/0.005/740	0.1/1110/0.01/740	1e-06	1e-07
La	0.26/1110/10.8/740	0.335/1110/21.5/740	0.2171/1110/0.3/740	0.01/1110/1.31/740	0.28/1110/0.2/740	1e-06	12.19
Ce	0.31/1110/12.3/740	0.27/1110/17.85/740	0.1785/1110/0.2/740	0.01/1110/1.19/740	0.47/1110/0.5/740	1e-06	10.665
Nd	0.049/1110/14/740	0.4/1110/12.5/740	0.09/1110/0.15/740	0.01/1110/0.96/740	0.86/1110/2/740	1e-06	7.385
Sm	0.46/1110/8.985/740	0.42/1110/8.315/740	0.1145/1110/0.1/740	0.01/1110/0.684/740	0.6/1110/4/740	1e-06	4.448
Eu	0.245/1110/3.9/740	0.32/1110/4.05/740	1.12545/1110/4.685/740	0.01/1110/0.4/740	1.1/1110/4.8/740	1e-06	2.945
Dy	0.5485/1110/6.8/740	0.51/1110/0.09/740	0.1515/1110/0.02/740	0.01/1110/0.37/740	1.5/1110/5/740	1e-06	2.1
Yb	0.77/1110/2.1/740	0.49/1110/0.09/740	0.16/1110/0.01/740	0.01/1110/0.55/740	2/1110/3.8/740	1e-06	1.425
Pb	0.29/1110/0.009/740	2.9/1110/0.1/740	0.61/1110/0.4/740	0.1/1110/0.1/740	0.515/1110/0.03/740	1e-06	1e-07
Format for D values: DAnd / High Temp / DRhy / Low Temp. D values are interpolated at each temperature step between
Mineral/Fluid partition coefficients set to 10000 in appropriate models where fluid exsolved
Apatite and Kspar on the liquidus at the last few temperature steps in the MCS models. Their effect on the liquid composition is negligible and they are ignored
Garnet is set as an excluded phase for all models
Sources - End Temp									Sources - Start Temp
	Opx	Spinel	Feldspar	Rhm-Oxide	Cpx	Qtz	Ol		Opx	Spinel	Feldspar	Rhm-Oxide	Cpx
Sc	Sisson (1991)	Mahood and Hildreth (1983)	Padilla and Guala (2016)	Mahood and Hildreth (1983)	Bacon and Druitt (1988)	Assumed	Michael 1988		Bacon and Druitt (1988)	Luhr and Carmichael (1980)	Bacon and Druitt (1988)	Bacon and Druitt (1988)	Bacon and Druitt (1988)
V	Sisson (1991)	Reid (1983)	Padilla and Guala (2016)	Microprobe / LA-ICPMS	Sisson (1991)	Assumed	Luhr and Carmichael (1980)		Luhr and Carmichael (1980)	Luhr and Carmichael (1980)	Luhr and Carmichael (1980)	Microprobe / LA-ICPMS	Luhr and Carmichael (1980)
Rb	Streck (unpublished)	Streck (unpublished)	Streck (unpublished)	Streck (unpublished)	Streck (unpublished)	Assumed	Assumed		Bacon and Druitt (1988)	Ewart and Griffin (1994)	Ewart and Griffin (1994)	Bacon and Druitt (1988)	Philpotts and Schnetzler (1970)
Sr	Streck (unpublished)	Bacon and Druitt (1988)	Streck (unpublished)	Bacon and Druitt (1988)	Streck (unpublished)	Assumed	Assumed		Bacon and Druitt (1988)	Ewart and Griffin (1994)	Nagasawa (1973)	Bacon and Druitt (1988)	Ewart and Griffin (1994)
Y	Streck (unpublished)	Streck (unpublished)	Streck (unpublished)	Streck (unpublished)	Streck (unpublished)	Assumed	Assumed		Ewart and Griffin (1994)	Ewart and Griffin (1994)	Ewart and Griffin (1994)	Nielsen et al. (1992)	Ewart and Griffin (1994)
Nb	Streck (unpublished)	Streck (unpublished)	Streck (unpublished)	Streck (unpublished)	Streck (unpublished)	Assumed	Assumed		Ewart and Griffin (1994)	Nielsen and Beard (2000)	Dunn and Sen (1994)	Green and Pearson (1987)	Ewart and Griffin (1994)
Ba	Streck (unpublished)	Streck (unpublished)	Streck (unpublished)	Streck (unpublished)	Streck (unpublished)	Assumed	Assumed		Bacon and Druitt (1988)	Luhr and Carmichael (1980)	Bacon and Druitt (1988)	Bacon and Druitt (1988)	Bacon and Druitt (1988)
La	Mahood and Hildreth (1983)	Mahood and Hildreth (1983)	Streck (unpublished)	Mahood and Hildreth (1983)	Streck (unpublished)	Assumed	Mahood and Hildreth (1983)		Bacon and Druitt (1988)	Luhr and Carmichael (1980)	Fujimaki et al. (1984)	Bacon and Druitt (1988)	Bacon and Druitt (1988)
Ce	Mahood and Hildreth (1983)	Mahood and Hildreth (1983)	Streck (unpublished)	Mahood and Hildreth (1983)	Streck (unpublished)	Assumed	Mahood and Hildreth (1983)		Bacon and Druitt (1988)	Luhr and Carmichael (1980)	Fujimaki et al. (1984)	Bacon and Druitt (1988)	Bacon and Druitt (1988)
Nd	Mahood and Hildreth (1983)	Mahood and Hildreth (1983)	Streck (unpublished)	Mahood and Hildreth (1983)	Streck (unpublished)	Assumed	Mahood and Hildreth (1983)		Schnetzler and Philpotts (197)	Luhr and Carmichael (1980)	Fujimaki et al. (1984)	Bacon and Druitt (1988)	Nicholls and Harris (1980)
Sm	Mahood and Hildreth (1983)	Mahood and Hildreth (1983)	Streck (unpublished)	Mahood and Hildreth (1983)	Streck (unpublished)	Assumed	Mahood and Hildreth (1983)		Bacon and Druitt (1988)	Luhr and Carmichael (1980)	Schnetzler and Philpotts (197)	Bacon and Druitt (1988)	Bacon and Druitt (1988)
Eu	Mahood and Hildreth (1983)	Mahood and Hildreth (1983)	Streck and Grunder (1997)	Mahood and Hildreth (1983)	Streck (unpublished)	Assumed	Mahood and Hildreth (1983)		Luhr and Carmichael (1980)	Luhr and Carmichael (1980)	Fujimaki et al. (1984)	Bacon and Druitt (1988)	Bacon and Druitt (1988)
Dy	Mahood and Hildreth (1983)	Streck (unpublished)	Bachman et al. (2005)	Mahood and Hildreth (1983)	Streck (unpublished)	Assumed	Mahood and Hildreth (1983)		Schnetzler and Philpotts (197)	Luhr and Carmichael (1980)	Schnetzler and Philpotts (197)	Bacon and Druitt (1988)	Luhr and Carmichael (1980)
Yb	Mahood and Hildreth (1983)	Streck (unpublished)	Bachman et al. (2005)	Mahood and Hildreth (1983)	Streck (unpublished)	Assumed	Mahood and Hildreth (1983)		Bacon and Druitt (1988)	Luhr and Carmichael (1980)	Reid (1983)	Bacon and Druitt (1988)	Luhr and Carmichael (1980)
Pb	Streck (unpublished)	Streck (unpublished)	Streck (unpublished)	Streck (unpublished)	Streck (unpublished)	Assumed	Assumed		Dunn and Senn (1994)	Luhr and Carmichael (1980)	Ewart and Griffin (1994)	Streck (unpublished)	Ewart and Griffin (1994)
Inputs for Models in Figure 13
	2 wt% H2O			3 wt%			4 wt%			5 wt%			2 wt% H2O			5 wt%
r-MELTS version	1.2	1.2	1.1	1.2	1.2	1.1	1.2	1.2	1.1	1.2	1.2	1.1	1.2	1.2	1.1	1.2	1.2	1.1
P (MPa)	400	300	200	400	300	200	400	300	200	400	300	200	400	300	200	400	300	200
T start	1100	950	875	1100	950	856	1100	980	846	1100	950	846	1160	950	860	1050	950	860
T End	760	750	740	760	750	740	760	748	740	760	748	740	800	800	740	800	800	740
T increment	2	2	2	2	2	2	2	2	2	2	2	2	5	5	5	5	5	5
T stop*	930.43	830.41	-	930.15	830.22	-	929.92	830.92	-	930.77	831.04	-	931.83	832.5	-	929.73	829.23	-
ƒO2	ΔFMQ (-1)	ΔFMQ (-1)	ΔFMQ (-1)	ΔFMQ (-1)	ΔFMQ (-1)	ΔFMQ (-1)	ΔFMQ (-1)	ΔFMQ (-1)	ΔFMQ (-1)	ΔFMQ (-1)	ΔFMQ (-1)	ΔFMQ (-1)	NNO	NNO	NNO	NNO	NNO	NNO
SiO2	57.871	66.4487	70.2449	57.31	64.09	68.02	56.76	62.13	66.51	56.2179	60.6526	66.0458	59.2386	67.5868	71.5361	57.546	61.7354	66.1359
TiO2	0.764556	0.647406	0.308921	0.76	0.56	0.25	0.75	0.5	0.2	0.742716	0.399043	0.187034	0.61728	0.710482	0.334841	0.599642	0.376728	0.213873
Al2O3	20.2117	14.387	12.4335	20.02	15.38	13.28	19.82	16.27	13.86	19.6344	16.7428	14.0143	19.8643	13.6885	11.5065	19.2967	16.0085	13.4656
Fe2O3	0.568516	0.450404	0.299136	0.56	0.47	0.33	0.56	0.49	0.34	0.552276	0.506419	0.340034	0.720946	0.639673	0.367103	0.723355	0.722145	0.440615
Cr2O3	0	0	0	0	0	0	0	0	0	0	0	0	0	0	0	0	0	0
FeO	3.84238	2.92547	1.74832	3.81	3.11	1.9	3.77	3.28	1.92	3.73262	3.38193	1.92721	2.98413	2.10235	0.987581	2.87816	2.46794	1.28339
MnO	0.068614	0.131082	0.157194	0.07	0.12	0.14	0.07	0.1	0.13	0.066654	0.0935718	0.130533	0.0597041	0.111192	0.131374	0.0579982	0.0790774	0.103679
MgO	2.17604	0.604379	0.235369	2.15	0.87	0.37	2.13	1.13	0.44	2.11388	1.36046	0.468091	1.79112	0.68631	0.346167	1.73994	1.39426	0.689094
NiO	0	0	0	0	0	0	0	0	0	0	0	0	0	0	0	0	0	0
CoO	0	0	0	0	0	0	0	0	0	0	0	0	0	0	0	0	0	0
CaO	7.80239	4.02653	3.03686	7.73	4.25	3	7.65	4.51	2.89	7.57951	4.84069	2.84476	7.6907	4.02581	3.04932	7.47095	4.74317	3.0064
Na2O	2.51911	2.28243	1.83367	2.49	2.63	2.32	2.47	2.77	2.58	2.44715	2.77737	2.7041	2.73222	2.39342	1.89448	2.65415	2.90426	2.82877
K2O	1.98	3.84841	4.68515	1.96	3.33	4.17	1.94	2.93	3.86	1.92344	2.68217	3.74365	2.15542	3.97205	4.8243	2.09383	2.83408	3.70392
P2O5	0.235248	0.471296	0.580225	0.23	0.4	0.51	0.23	0.35	0.47	0.228528	0.320818	0.451947	0.186196	0.35437	0.43584	0.180876	0.246614	0.324866
H2O	1.9604	3.77687	4.43678	2.91	4.78	5.7	3.85	5.53	6.81	4.761	6.2421	7.14247	1.95937	3.72909	4.58641	4.75845	6.4879	7.80383
Modal Percentages from r-MELTS outputs
Plag	80	78	32	78	78	35	75	77	43	73	76	55	84	80	18	80	77	39
Mag	17	4	1	2	4	1	2	3	1	2	3	1	2	5	<1	3	5	1
Opx	2	15	2	17	16	3	16	18	6	14	20	8	13	11	-	10	16	3
Cpx	1	3	5	3	-	1	7	-	-	11	-	-	<1	-	5	7	2	3
Ilm	-	-	1	1	3	0	-	2	0	-	1	<1	<1	4	<1	-	<1	<1
Fay	-	-	1	-	-	1	-	-	1	-	-	<1	-	-	<1	-		-
Qtz	-	-	38	-	-	32	-	-	28	-	-	24	-	-	39	-	-	28
San	-	-	19	-	-	26	-	-	21	-	-	12	-	-	36	-	-	24
Apa	-	-	-	-	-	0	-	-	-	-	-	-	-	-	<1	-	-	-
*Temperature at which the output was taken for the next step. Modal percentages correspond to this temperature

## Sheet: S10. IDM Model
LSQ Model Inputs and Results
	Sample	SiO2	TiO2	Al2O3	FeO	MnO	MgO	CaO	Na2O	K2O	P2O5	NiO	Cr2O3
Parent	BOL12017A	69.89	0.39	15.2	2.51	0.05	1.01	2.48	3.24	5.13	0.1	0	0
Daughter	CH19C009	73.6	0.2	15.78	1.33	0.09	0.3	1.42	3.18	4.05	0.05	0	0
	Quartz	100	0	0	0	0	0	0	0	0	0	0	0
	Magnetite	0	0	0	100	0	0	0	0	0	0	0	0
	Kspar	64.51	0	19.55	0.06	0	0	0.17	2.2	13.15	0	0	0
	Plag	58.88	0	26.64	0	0.17	0	0	7.51	6.66	0.69	0	0
	Biotite	37.05	4.05	13.81	0	17.58	0.26	13.2	0.04	0.33	9.25	0	0
	Hornblende	44.92	1.23	8.63	0	16.64	0.64	11.89	11.97	1.36	1.1	0	0
Default wt. was used for the igpet model. NiO and Cr2O3 are ignored
		SiO2	TiO2	Al2O3	FeO	MnO	MgO	CaO	Na2O	K2O	P2O5	NiO	Cr2O3
	Calc	70	0.23	15.69	2.53	0.07	1.05	2.47	2.88	5.05	0.02	0	0
	Diff*wt	0.04	0.17	0.24	0.02	0.02	0.04	0.01	0.36	0.07	0.08	0	0
	ΣR2	0.236
	F	0.353
	Mineral	Mode from LSQ	Mode in source (Kaiser, 2014)	Mode Obeying Products
	Quartz	23	11	34.96
	Magnetite	1.1	2	1.672
	Kspar	38	36	57.76
	Plag	26.4	36	40.128
	Biotite	3.3	10	5.016
	Hornblende	8.3	5	12.616
		100	100	152.152
Input Trace Elements and D Values and IDM Setup
Example for Rb
Assuming the Reaction: Modal minerals -> 1.0 melt + 0.02 titanite + 0.5 Cpx (Assumptions 3-5)
Steps	6	7	8				9	10		11		12
	pi	Σalpha^	tliq	tttn	tcpx	D values	Σbeta ti*Ki	Di	D0	pi* Ki	Σ (pitheta + pialpha) * Ki	Q0
Quartz	0.23	0.621	1.61031	0.0322061	0.805153	1e-10	0.00853462	1.1e-11	1.0396	2.3e-11	0.56557	0.406287
Magnetite	0.011					0.05		0.001		0.00055
Kspar	0.38					0.7		0.252		0.266
Plag	0.264					0.235		0.0846		0.06204
Biotite	0.033					6.98		0.698		0.23034
Hornblende	0.083					0.08		0.004		0.00664
Titanite						0.015				0
Cpx						0.01
	13		14		15
	Φ	Source [Rb]	F	X	[Rb] liq
	0.001	163	1	1	114.854
			0.9	0.8999	118.773
			0.8	0.7998	122.756
			0.7	0.6997	126.8
			0.6	0.5996	130.906
			0.5	0.499499	135.07
			0.4	0.399399	139.293
			0.3	0.299299	143.573
			0.2	0.199199	147.909
			0.1	0.0990991	152.301
^Minerals thought to be taking place in reaction
														Rb	Y	La	Sr	Ba	Eu	Dy	Yb	Sm	V
D values													Quartz	Assumed	Assumed	Assumed	Assumed	Assumed	Assumed	Assumed	Assumed	Assumed	Assumed
		Rb	Y	La	Sr	Ba	Eu	Dy	Yb	Sm	V		Magnetite	Streck (unpublished)	Bachman et al. (2005)	Streck and Grunder (1997)	Bacon and Druitt (1988)	Streck (unpublished)	Streck and Grunder (1997)	Streck (unpublished)	Streck (unpublished)	Bachman et al. (2005)	Reid (1983)
	Quartz	1e-10	1e-10	1e-10	1e-10	1e-10	1e-10	1e-10	1e-10	1e-10	1e-10		Kspar	Bachman et al. (2005)	Streck (unpublished)	Streck (unpublished)	Bea et al. (1994)	Mahood and Hildreth 1983	Padilla and Gualda (2016)	Bea et al. (1994)	Bea et al. (1994)	Bea et al. (1994)	Bea et al. (1994)
	Magnetite	0.05	0.03	0.22	0.01	0.005	0.13	0.09	0.09	0.1	130		Plag	Streck and Grunder (1997)	Bachman et al. (2005)	Padilla and Gualda (2016)	Bea et al. (1994)	Bea et al. (1994)	Assumed	Streck (unpublished)	Streck (unpublished)	Bachman et al. (2005)	Padilla and Gualda (2016)
	Kspar	0.7	0.05	0.138	0.77	1	2.33	0.77	0.64	0.42	0.22		Biotite	Bea et al. (1994)	Streck unpub	Padilla and Gualda (2016)	Streck (unpublished)	Bea et al. (1994)	Bea et al. (1994)	Streck (unpublished)	Bea et al. (1994)	Bachman et al. (2005)	Bea et al. (1994)
	Plag	0.235	0.02	0.307	1.25	0.19	2	0.07	0.07	0.1	0.281		Hornblende	Streck (unpublished)	Streck (unpublished)	Padilla and Gualda (2016)	Padilla and Gualda (2016)	Bachman et al. (2005)	Streck (unpublished)	Padilla and Gualda (2016)	Streck (unpublished)	Padilla and Gualda (2016)	Padilla and Gualda (2016)
	Biotite	6.98	0.03	0.021	0.6	0.59	0.05	0.02	0.12	0.01	79.5		Titanite	Padilla and Gualda (2016)	Padilla and Gualda (2016)	Padilla and Gualda (2016)	Padilla and Gualda (2016)	Bachman et al. (2005)	Tiepolo et al. (2002)	Tiepolo et al. (2002)	Padilla and Gualda (2016)	Prowatke and Klemme (2004)	Padilla and Gualda (2016)
	Hornblende	0.08	4	1.04	0.442	0.08	4.8	11	3.3	8.1	31		Cpx	Streck (unpublished)	Streck (unpublished)	Streck (unpublished)	Sisson (1991)	Streck (unpublished)	Streck (unpublished)	Streck (unpublished)	Streck (unpublished)	Sisson (1991)	Sisson (1991)
	Titanite	0.015	344	75	0.904	0.01	6.85	5.33	183	20.4	214
	Cpx	0.01	4.8	0.2	3.285	0.01	4.8	5	3.8	3.6	14
Source Concentrations
		Rb	Y	La	Sr	Ba	Eu	Dy	Yb	Sm	V
	[]	163	29.12	34.36	273	613	0.83	5.08	2.49	5.68	85
	Sample^	CC9317a	JFKBOL12-017B	JFKBOL12-017B	JFKBOL12-017A	CC9317	JFKBOL12-024B	CC9317	CC9317	CC9317	CC9317
^All samples are plutonic clasts analyzed by Kaiser (2014), Kaiser et al. (2017), or Watts et al. (1999)
				Σalpha^	tliq	tttn	tcpx	D values	Σbeta ti*Ki	Di	D0	pi* Ki	Σ (pitheta + pialpha) * Ki = P0	Q0
Quartz	34.96		0.23	0.621	1.61031	0.0322061	0.805153	1e-10	0.00853462	1.1e-11	1.0396	2.3e-11	0.56557	0.406287
Magnetite	1.672		0.011					0.05		0.001		0.00055
Kspar	57.76		0.38				0.7	0.7		0.252		0.266
Plag	40.128		0.264					0.235		0.0846		0.06204
Biotite	5.016		0.033				6.98	6.98		0.698		0.23034
Hornblende	12.616		0.083					0.08		0.004		0.00664
Titanite	152.152		100.1					0.015
Cpx								0.01
	13		14		15
	Φ	Source [Rb]	F	X	[Rb] liq
	0.001	163	1	1	114.854
			0.9	0.8999	118.773
			0.8	0.7998	122.756
			0.7	0.6997	126.8
			0.6	0.5996	130.906
			0.5	0.499499	135.07
			0.4	0.399399	139.293
			0.3	0.299299	143.573
			0.2	0.199199	147.909
			0.1	0.0990991	152.301
																																	jfkbol12017a
																									Quartz	1e-10
																									Magnetite	0.01
																									Kspar	0.77
																									Plag	1.25
																									Biotite	0.6
																									Hornblende	2
																									Titanite	0.904
																									Cpx	0.25

[truncated: 2 more sheets: S11. Melt-Mix Model, S12. Locations]
